# Supplementary material for: Transcriptomic responses of Biomphalaria pfeifferi to Schistosoma mansoni: Investigation of a neglected African snail that supports more S. mansoni transmission than any other snail species
Source: PLoS Negl Trop Dis. 2017 Oct 18;11(10):e0005984. doi: 10.1371/journal.pntd.0005984 (PMC5685644; doi:10.1371/journal.pntd.0005984)
Supplement: S4 File — (XLSX) [file pntd.0005984.s012.xlsx]

## Sheet: 1d
CATEGORY		B. PFEIFFERI CDS	GENE OF INTEREST	NORMALIZED READ COUNTS						LOG2 FOLD CHANGE
				Control			1d			3v3 All 3 Reps	3v2 R2, R3	3v1 R1 only
				R1	R2	R3	R1	R2	R3
IMMUNE, STRESS, DEFENSE	Cell adhesion	evgTRINITY_DN89350_c16_g1_i1	protocadherin Fat 4-like	125.474	55.8293	141.431	181.785	207.272	229.308	0.935588	1.01809
		evgTRINITY_DN92014_c2_g1_i1	protocadherin-15-like isoform X1	18.9206	16.2835	6.60894	0	5.09685	1.85674	-2.40148
		evgTRINITY_DN87865_c0_g2_i1	carbonyl reductase	0	1.16311	392.571	0	0	0	-8.38101	-7.88849	-7.96505
		evgTRINITY_GG_10644_c0_g1_i1	caveolin 1-like (Bp v1)	791.987	1007.49	840.472	577.712	545.729	495.853	-0.704736	-0.756232	-0.589277
		evgTRINITY_DN99929_c0_g1_i1	caveolin 1-like (Bp v2)	1440.95	1500.41	1571.61	988.166	733.947	886.595	-0.790466	-0.891272	-0.587265
		evglcl|G0WVJSS01BPTNZ	Dermatopontin 2	44.802	60.0398	0	92.8658	290.368	322.173		3.11336
		evgTRINITY_GG_9019_c0_g1_i1	Dermatopontin 2	0.995822	2.31459	17.712	200.08	52.608	170.969			4.79082
		evglcl|G0WVJSS01ANSJ0	Dermatopontin 2	0	2.33785	6.31815	70.0805	6.03977	46.4279			4.49169
		evglcl|G0WVJSS01C59OH	Dermatopontin 2	2.98747	0	5.55151	33.2418	3.89909	31.3697			3.44201
		evgTRINITY_DN93533_c21_g1_i1	strain EAF Dermatopontin 2	0	6.97866	10.5743	146.78	29.7316	135.7	4.06398	3.58778	4.60608
		evgTRINITY_DN94484_c0_g1_i1	strain EAF Dermatopontin 2	1825.65	1770.32	25.8674	2821.49	10630.6	8680.81		2.99194
		evglcl|G0WVJSS01D4G0J	strain EAF Dermatopontin 2	242.184	105.215	2.92115	332.333	856.696	810.849		2.82783
		evgTRINITY_GG_22084_c2_g1_i1	Dermatopontin 3 (Bp v1)	0	2.58211	15.5971	146.492	36.1027	279.18		4.41114	4.54513
		evgTRINITY_GG_454Uninf_9505_c0_g22_i1	Dermatopontin 3 (Bp v1)	58.634	28.566	0	102.864	395.304	236.187		3.39522
		evglcl|G0WVJSS02H57GM	Dermatopontin 3 (Bp v1)	87.9211	56.155	0	145.498	594.582	399.766		3.34303
		evglcl|G0WVJSS02GMWIL	Dermatopontin 3 (Bp v1)	13.344	21.0756	0	14.9079	41.3015	61.3283		2.11153
		evglcl|G0WVJSS01ED7H4	Dermatopontin 3 (Bp v2)	8.69353	5.43173	0	22.863	64.9424	32.5302		3.2236	2.25089
		evgTRINITY_DN74690_c0_g1_i1	mammalian ependymin-related protein 1-like	0	6.97866	19.8268	18.6446	25.4843	33.4214		1.67526
		evgTRINITY_DN23074_c0_g1_i1	ficolin 2-like	53.7744	6.97866	9.21286	1093.82	884.304	1893.88	5.7665	5.80797	5.53937
		evgTRINITY_DN90820_c12_g1_i1	ficolin 2-like isoform X1	32.0256	8.14177	6.55607	556.154	413.066	672.308	5.09967	5.0582	5.14241
		evgTRINITY_GG_8561_c37_g1_i1	ficolin-2-like isoform X1	4.77995	0	2.69645	80.0632	50.0851	98.0546	4.72711	4.63223	4.85824
		evglcl|G0WVJSS01CV8ZS	ficolin-1-like, partial	0.248956	11.003	10.3893	28.2078	10.474	13.1736			1.94306
		evgTRINITY_GG_2582_c6_g2_i2	ficolin-1-like	15.724	33.4278	34.7762	70.2204	42.3294	39.5579			1.34097
		evglcl|G0WVJSS01B1FCE	ficolin-1-like	48.0683	59.9002	66.7371	138.592	58.6053	58.1068			1.27173
		evgTRINITY_DN74702_c1_g1_i1	galectin-6-like	113.524	127.942	91.2033	73.0248	49.2696	42.7051	-1.00643	-1.25522
		evgTRINITY_DN90738_c16_g1_i1	granulins-like isoform X3	239.515	297.745	290.952	414.96	552.72	471.399	0.796199	0.890549	0.607881
	Cellular defense	evgTRINITY_DN87102_c4_g1_i1	ADAM family mig-17-like, partial	172.277	68.6235	130.857	230.727	286.273	282.225	1.10179	1.19496
		evgTRINITY_DN85819_c3_g1_i1	ADAM family mig-17-like isoform X1 (Bp v1)	1665.01	1236.39	1010.73	426.496	733.098	465.114	-1.26716	-1.12688	-1.62696
		evgTRINITY_DN84431_c0_g1_i2	ADAM family mig-17-like isoform X1 (Bp v2)	47.4011	36.1611	10.8387	3.60463	4.28985	0	-3.39617	-3.54701
		evglcl|G0WVJSS02JSCWL	C3 and PZP-like alpha-2-macroglobulin domain-containing protein 8	495.441	0	0.462626	4.69223	0	0	-6.40232
		evglcl|G0WVJSS01C9U3Z	cytidine deaminase mRNA	43.1788	44.9542	103.245	136.378	133.096	157.953	1.15434	1.18321
		evglcl|G0WVJSS01BO5WT	cytidine deaminase mRNA	256.992	188.703	188.17	68.6899	152.991	65.3295	-1.13982		-1.60531
		evglcl|G0WVJSS01AUR8H	cytidine deaminase mRNA	617.908	567.935	432.198	139.027	313.397	126.407	-1.48114	-1.29765	-1.94303
		evglcl|G0WVJSS01B43Z2	cytidine deaminase mRNA	171.082	153.682	150.723	42.1446	50.4843	64.7168	-1.58824	-1.44713	-1.86513
		evglcl|G0WVJSS02HDBUG	cytidine deaminase mRNA	1342.08	1006.11	640.446	266.3	419.327	236.085	-1.69582	-1.61349
		evgTRINITY_GG_4941_c6_g1_i1	cytidine deaminase mRNA	1475.09	1492.59	1208.62	314.418	668.801	296.782	-1.70515	-1.52975	-2.12868
		evglcl|G0WVJSS01BJACA	cytidine deaminase mRNA	278.312	262.037	151.847	51.5058	94.861	61.2168	-1.73175	-1.56186	-2.16016
		evglcl|G0WVJSS01BMBAP	cytidine deaminase-like	275.444	264.131	215.623	68.2394	154.137	60.3906	-1.41347	-1.22976	-1.85176
		evgTRINITY_GG_2525_c0_g1_i1	GTPase IMAP family member 7-like (Bp v5)	50.7869	30.2409	30.4011	94	40.7748	88.1953			1.34736
		evgTRINITY_DN90270_c20_g1_i1	GTPase IMAP family member 4-like	42.8203	131.432	142.383	79.2397	260.611	276.358		1.34083
		evgTRINITY_DN90451_c3_g1_i1	GTPase IMAP family member 7-like (Bp v1)	56.9511	129.105	186.372	171.686	259.09	296.151		1.15482
		evgTRINITY_DN17902_c0_g1_i1	GTPase IMAP family member 7-like (Bp v2)	28.1021	41.7906	32.1855	43.4575	57.4246	74.344		0.948953
		evgTRINITY_BU_DN80112_c3_g1_i1	GTPase IMAP family member 7-like (Bp v4)	0	2.45416	8.08934	0	33.979	70.8069		3.70215
		evglcl|G0WVJSS02F32RU	Histone H3.3	84.8241	157.718	135.325	296.201	122.299	339.236			1.24396
		evgTRINITY_DN92599_c10_g2_i1	Macrophage expressed gene-1 (MPEG1)	41.8245	15.1204	50.2279	177.901	46.7212	132.757			2.30684
		evgTRINITY_GG_16068_c11_g1_i1	multidrug resistance-associated protein 1-like isoform X2	0	24.4253	40.9754	162.364	67.1086	0			2.87154
		evgTRINITY_DN93345_c2_g1_i1	multidrug resistance-associated protein 1-like (Bp v1)	64.7284	253.558	166.545	480.099	681.28	270.156			1.54849
		evgTRINITY_DN92479_c6_g3_i1	multidrug resistance-associated protein 1-like (Bp v2)	35.272	28.787	50.1222	87.6376	39.8149	70.7419			1.21743
		evgTRINITY_DN87672_c0_g1_i1	multidrug resistance-associated protein 1-like (Bp v3)	594.506	604.818	787.785	250.926	598.031	244.162			-1.39066
		evgTRINITY_DN92637_c6_g1_i1	multidrug resistance-associated protein 1-like (Bp v4)	54.7702	41.872	48.9061	525.157	298.166	407.555	3.06981	2.84512	3.44581
		evgTRINITY_GG_4472_c3_g1_i1	multiple epidermal growth factor-like domains protein 11 (Bp v1)	172.277	296.593	219.417	446.694	413.695	791.901			0.9717
		evgTRINITY_DN93448_c4_g1_i2	multiple epidermal growth factor-like domains protein 11 (Bp v1)	29.1178	41.651	47.8091	98.8865	75.8667	158.38			1.34448
		evgTRINITY_DN93524_c10_g1_i2	multiple epidermal growth factor-like domains protein 11 (Bp v2)	84.0474	28.8219	173.247	260.87	347.07	483.942	1.92775	2.10976
		evgTRINITY_GG_13339_c0_g1_i1	multiple epidermal growth factor-like domains protein 11 (Bp v3)	33.3302	2.54721	18.5976	52.1195	42.5502	49.0459	1.38036
		evgTRINITY_DN105096_c0_g1_i1	multiple epidermal growth factor-like domains protein 11 (Bp v4)	255.926	18.6098	30.4011	965.637	680.43	1458.47	3.34275
		evgTRINITY_DN50119_c0_g1_i1	Tumor necrosis factor, alpha-induced protein 380	152.361	130.268	175.798	89.3389	80.7002	104.906	-0.735069	-0.712996
		evgTRINITY_DN61848_c1_g1_i1	Zinc carboxypeptidase A 1-like	63.7326	42.8955	27.7575	542.248	1363.41	482.753	4.13965		3.6065
		evgTRINITY_DN61923_c0_g1_i1	zinc carboxypeptidase A 1-like or B-like	16.929	13.969	14.381	224.512	626.31	185.674	4.48112		3.8886
	Metal binding and transport	evgTRINITY_DN64265_c2_g1_i1	CDK5RAP1-like protein variant X2	0	1.16311	56.8369	0	0	0	-5.64274
		evglcl|G0WVJSS01BIZ36	Cysteine-rich motor neuron 1 protein-like	10.9939	0	1.32179	43.2089	219.53	168.509			3.29739
		evglcl|G0WVJSS01CP1EJ	Cysteine-rich motor neuron 1 protein-like	5.05878	1.20964	0	30.3675	156.575	96.2165	5.25367	5.62886	3.71619
		evgTRINITY_DN97294_c0_g1_i1	Cysteine-rich motor neuron 1 protein-like	4.6007	1.80282	0	19.8721	121.288	54.1798		5.04036
		evgTRINITY_GG_454Uninf_8644_c1_g2_i1	Cysteine-rich motor neuron 1 protein-like	4.38162	1.26779	0	8.28133	69.2917	44.3669		4.61643
		evglcl|G0WVJSS01DG1PS	Cysteine-rich motor neuron 1 protein-like	9.60968	4.65244	0	8.54546	39.9339	41.7953		3.00096
		evgTRINITY_DN92011_c14_g1_i1	Cytochrome P450	277.834	340.547	422.972	651.785	1342.1	930.052		1.70155	0.91945
		evgTRINITY_BU_DN82356_c9_g1_i7	cytochrome P450 2J1-like (Bp v1)	122.456	302.479	27.5461	779.198	75.8582	348.037			2.34088
		evgTRINITY_DN93348_c10_g1_i5	cytochrome P450 2J1-like (Bp v2)	42.5415	106.471	51.5365	249.131	72.9785	95.4738			1.89877
		evgTRINITY_DN91369_c15_g1_i1	ytochrome P450 3A19-like	66.7201	38.3827	37.0101	154.595	60.3128	125.33			1.70867
		evgTRINITY_DN86874_c0_g2_i1	cytochrome P450 2B4-like	14.9373	32.5671	11.8961	62.1488	43.3233	14.854			1.6544
		evgTRINITY_GG_24107_c5_g1_i1	cytochrome P450 4F22-like	14.9373	4.65244	13.2179	31.8513	23.7853	16.7107			1.54677
		evgTRINITY_DN93348_c10_g1_i1	cytochrome P450 2J1-like	60.8945	102.61	68.4818	200.034	81.1929	84.4447			1.38775
		evgTRINITY_DN92887_c11_g3_i1	cytochrome P450 3A24-like isoform X1	371.442	435.003	429.581	275.008	363.576	227.451			-0.561125
		evgTRINITY_GG_24768_c0_g2_i1	cytochrome P450 3A24-like	108.953	141.748	109.166	52.205	57.8918	157.081			-1.1611
		evgTRINITY_GG_454Uninf_399_c1_g2_i1	cytochrome P450 2E1-like	128.69	162.114	104.21	56.501	114.348	18.1404			-1.19232
		evgTRINITY_DN92655_c17_g1_i1	cytochrome P450 2E1-like	1472.59	1683.74	1454.18	636.458	1257.55	420.98			-1.25181
		evglcl|G0WVJSS01A3HCS	cytochrome P450 3A41-like	14.8577	26.4491	21.1883	5.23604	15.3076	16.8128			-1.76256
		evgTRINITY_DN91076_c26_g1_i1	cytochrome P450 10-like	62.7368	43.0351	34.3665	18.6446	6.79581	18.5674	-1.64484	-1.829
		evgTRINITY_GG_5633_c1_g1_i1	Cytochrome P450 1A1-like	1758.62	750.206	2083.14	86.2314	460.416	92.8372	-2.84183	-2.48564	-4.238
		evgTRINITY_DN91076_c14_g1_i1	cytochrome P450 27C1-like isoform X1	820.557	457.102	495.67	2330.58	1484.03	1746.27	1.6482	1.44752	1.97919
		evgTRINITY_DN38280_c1_g1_i1	cytochrome P450 3A-like	236.01	289.615	195.625	111.868	180.089	103.049			-1.08371
		evgTRINITY_DN91008_c2_g2_i1	cytochrome P450 4F22-like	38.8371	34.1373	50.2279	120.413	85.797	71.4846	1.16481		1.5681
		evgTRINITY_GG_10034_c0_g1_i1	cytochrome p450 2u1	35.8596	60.4818	42.3104	157.011	38.2009	142.811			1.78492
		evgTRINITY_GG_454Inf_483_c0_g1_i1	DBH-like monooxygenase protein 1	9.22131	16.2254	0	72.349	34.064	84.0177	2.84702		3.07989
		evgTRINITY_GG_375_c0_g1_i1	DBH-like monooxygenase protein 1 homolog	23.1927	19.3425	17.5798	60.8204	41.5903	42.6587	1.25453
		evgTRINITY_DN73816_c0_g1_i1	DBH-like monooxygenase protein 1 isoform X2 [	139.415	125.616	81.9508	14.7603	68.799	10.2121	-1.87445		-2.89766
		evgTRINITY_DN93675_c0_g1_i1	Monoxygenase DBH-like 1	14.6784	17.5048	59.4804	177.023	38.1415	60.8084			2.50485
		evgTRINITY_DN91512_c3_g1_i1	Myoglobin-like	433.183	441.982	528.715	748.116	599.73	688.852	0.536435		0.69301
	Oxidative/antioxidative response	evgTRINITY_DN69852_c1_g1_i1	Chorion peroxidase-like	271.859	125.616	31.7229	2553.54	728.85	3146.25	3.90109		4.16169
		evgTRINITY_DN102349_c0_g1_i1	peroxidase-like	550.849	145.238	3.67457	678.976	3205.51	2007.14		3.45519
		evglcl|G0WVJSS02FNI16	superoxide dismutase [Cu-Zn]-like	3.59492	3.69869	0	16.3374	26.75	45.5181	3.40472	3.66082
		evgTRINITY_DN64919_c2_g1_i1	superoxide dismutase [Cu-Zn]-like	12817.7	3316.56	88.5598	12317.5	42032.8	42023.4		2.95368
		evgTRINITY_GG_454Uninf_294_c0_g1_i1	deglycase DJ-1zDJ-1-like	426.501	559.642	413.006	288.596	263.049	248.655	-0.805025	-0.865304
		evglcl|G0WVJSS01BV1DA	NADH dehydrogenase subunit 2	3.00738	4.66407	5.28715	33.405	2.54843	1.85674			2.91007
		evglcl|HJ4YRIA01DQPH2	NADH dehydrogenase subunit 1	14.5988	11.2705	0	56.4466	15.9192	22.7915			2.68772
		evglcl|HJ4YRIA02ICFA6	NADH dehydrogenase subunit 2	51.7827	50.0138	19.8268	219.851	18.6885	30.6363			2.44818
		evglcl|HJ4YRIA01EC2UO	NADH dehydrogenase subunit 5	193.488	289.766	110.528	34.7567	33.9875	39.8364	-2.43839	-2.41983	-2.53862
		evgTRINITY_DN15101_c0_g1_i1	peroxiredoxin 6 protein	0.995822	63.9711	0	0	0	0	-5.8033		-5.34838
		evgTRINITY_DN103351_c0_g1_i1	monomeric sarcosine oxidase-like	113.524	4.65244	35.6883	292.099	141.862	272.013	2.18931		2.42447
		evgTRINITY_DN78281_c1_g1_i1	Peroxisomal sarcosine oxidase-like, partial	37.8412	40.7089	58.1587	88.562	66.2591	65.9144			0.978421
		evgTRINITY_DN93655_c0_g1_i1	Peroxisomal sarcosine oxidase-like, partial	715	714.15	571.012	995.934	800.206	883.81			0.595979
		evgTRINITY_DN92232_c3_g1_i1	laccase-15-like	168.294	174.467	263.036	566.331	690.624	555.166	1.5789	1.62143	1.49563
		evgTRINITY_DN90772_c8_g1_i2	laccase-1-like	202.152	257.047	206.199	560.893	547.912	797.472	1.5168	1.59116	1.35888
		evgTRINITY_GG_18179_c0_g1_i1	laccase-2-like	10.954	1.16311	6.60894	23.3058	11.0432	12.0688			1.86804
		evgTRINITY_DN12476_c0_g1_i1	tyrosinase-1	146.535	69.7866	13.8391	438.708	1868.54	1546.07	4.05843	4.46413	2.47702
		evgTRINITY_DN25074_c0_g1_i1	tyrosinase-1	451.107	52.34	0	624.253	2595.01	2487.14		3.91612
		evgTRINITY_BU_DN81243_c14_g1_i1utrorf	spermine oxidase-like	35.8496	25.5884	27.7575	100.215	50.1191	64.986			1.76723
		evgTRINITY_DN94618_c0_g1_i1	superoxide dismutase [Cu-Zn], chloroplastic-like	61.741	29.0778	3.96536	79.2397	278.628	223.738		2.96911
		evgTRINITY_GG_16681_c6_g1_i1	thioredoxin domain-containing protein-like	461.643	529.215	539.289	785.18	531.772	822.538			0.641645
	Pattern recognition, carbohydrate binding, adhesion	evglcl|HJ4YRIA02IT8CR	annexin	11.9001	8.58376	22.5233	43.6751	0	20.4428			1.60991
		evgTRINITY_DN65632_c0_g1_i1	beta-1,3-glucan-binding protein-like precursor	368.434	45.1054	0	754.144	3471.94	2428.5		4.40046
		evglcl|G0WVJSS02GRNA4	beta-1,3-glucan-binding protein-like precursor	1.01574	3.74522	0	11.0625	156.805	79.0323	5.38287	5.82193
		evgTRINITY_DN93345_c1_g1_i2	C-type lectin domain family 4 member E-like	7.96658	61.6449	27.7575	118.86	106.184	94.6939	1.70324	1.61038	1.8294
		evgTRINITY_DN75025_c0_g1_i1	C-type lectin domain family 6 member A-like	32.8621	4.65244	2.64358	97.8843	69.657	59.4158	2.46422	2.22971	2.7892
		evgTRINITY_GG_443_c0_g2_i1	C1q complement C1q-like protein 4	0	29.0778	5.28715	605.345	2450.87	2278.93	7.22987	7.63337	5.72842
		evgTRINITY_GG_23963_c26_g1_i1	chitinase-3-like protein 1-like (Bp v2)	405.3	4.65244	68.733	1.55372	0.849476	1.85674	-6.46169	-6.49711	-6.68373
		evgTRINITY_BU_DN81934_c6_g1_i1	chitinase-3-like protein 1-like (Bp v3)	45.8078	63.9711	29.0793	12.4298	33.979	9.28372			-1.82639
		evgTRINITY_DN90770_c3_g1_i1	fibrillin-1	25.8914	34.8933	19.8268	6.99174	12.7421	35.2781			-1.76624
		evgTRINITY_DN93524_c10_g1_i6	fibrillin-1-like (Bp v1)	0	4.1872	11.4467	18.6602	24.8981	23.8592	2.0282
		evgTRINITY_DN93524_c9_g1_i3	fibrillin-1-like (Bp v2)	251.634	222.782	303.112	416.195	346.416	449.146	0.639346		0.696348
		evgTRINITY_GG_454Uninf_8510_c0_g10_i1	FREP 12.1 precursor	214.112	148.215	132.826	76.1245	92.9241	71.2804	-1.03922	-1.00369
		evgTRINITY_GG_454Uninf_7855_c4_g7_i1	FREP 12.1 precursor	241.796	187.075	110.264	83.8543	74.5415	60.4649	-1.29601	-1.41218
		evgTRINITY_GG_26552_c8_g1_i3	FREP 121-as1 precursor	187.643	231.157	165.567	189.562	131.856	115.22		-0.653381
		evgTRINITY_GG_5016_c3_g1_i1	FREP 12 variant 4	139.983	124.906	128.584	87.8162	94.793	55.8137	-0.719927	-0.793718
		evgTRINITY_BU_DN82396_c9_g3_i1	FREP 2.13 or 2.25	0	110.1	22.8669	134.443	308.241	2538.95		4.78156
		evglcl|G0WVJSS02I5PGR	FREP 2.27	4.47124	28.4729	7.82498	45.524	116.531	764.644	4.46707	4.78309
		evglcl|G0WVJSS02JSGF1	FREP 2.28	0.209123	5.81555	22.1003	30.4063	136.553	1060.52	5.38957	5.72632
		evglcl|G0WVJSS02IZYTO	FREP 2.29	2.29039	0	0	2.34612	2.438	293.913	6.43124
		evgTRINITY_GG_25704_c1_g1_i1	FREP 2.30	4.63057	73.8226	40.9225	167.281	269.556	1898.33		4.55747	2.02909
		evglcl|G0WVJSS01C6OZY	FREP 2.13 or 2.28	5.49694	1.07006	1.33501	6.71207	12.6317	123.529		4.27498
		evgTRINITY_GG_454Uninf_1186_c2_g3_i1utrorf	FREP 3	551.556	550.977	578.361	875.195	727.483	1355.69			0.662268
		evgTRINITY_GG_27635_c0_g1_i1	FREP 7-1 precursor	34.8139	41.8604	58.5023	60.3465	115.401	84.2498		1.14039
		evgTRINITY_DN92590_c9_g1_i1	hemocytin-like	55.7063	29.0778	34.3665	2139.79	347.996	864.658	4.80059		5.75503
		evgTRINITY_DN103478_c0_g1_i1	macrophage mannose receptor 1-like isoform X1	0.995822	3.48933	0	87.7852	126.572	66.8428	5.63823	5.612	5.654
		evgTRINITY_DN46513_c1_g1_i1	mucin-17-like	105.557	207.034	107.065	509.62	87.496	243.233			1.87324
		evgTRINITY_DN18340_c0_g1_i1	mucin-22-like (Bp v1)	494.924	540.846	498.314	825.025	716.108	1321.07			0.710023
		evgTRINITY_GG_16393_c4_g1_i1	mucin-22-like (Bp v2)	109.501	163.999	108.849	42.7351	99.3887	25.9944			-1.5471
		evgTRINITY_DN57642_c0_g1_i1	mucin-12-like	173.273	309.387	215.451	74.5785	164.798	66.8428			-1.64035
		evglcl|G0WVJSS02GE393	mucin-5AC-like	13.9714	6.2808	13.1386	1.29736	3.3979	3.62993			-2.37939
		evgTRINITY_GG_19441_c2_g1_i1	mucin-2-like (Bp v1)	18.3231	9.2351	20.7388	36.0774	59.6502	34.9346	1.4139
		evgTRINITY_DN89211_c3_g1_i3	mucin-2-like (Bp v1)	24.6466	32.6834	59.9695	76.0934	111.647	82.9686	1.19835	1.30458
		evglcl|G0WVJSS01BJBT4	mucin-2-like (Bp v2)	328.97	119.382	64.794	17.6036	4.96943	7.297	-4.04981	-4.73531
		evgTRINITY_DN65461_c0_g1_i1	mucin-2-like (Bp v2)	124.478	5.81555	18.505	2.33058	1.69895	0.928372	-4.60983	-4.83767
		evgTRINITY_DN90607_c3_g1_i2	mucin-3A-like	175.384	4.95485	180.371	316.151	283.232	301.433	1.31756
		evgTRINITY_DN90607_c3_g1_i1	mucin-3A-like	45.2999	5.51314	36.3624	72.0382	68.7736	65.9701	1.23488
		evgTRINITY_DN80969_c0_g1_i2	mucin-5AC-like	149.483	203.684	101.315	39.5732	68.6461	65.3017	-1.38305	-1.17503	-1.92795
		evglcl|G0WVJSS02JD4VW	mucin-5AC-like	62.8961	55.9573	24.1755	20.2294	17.7625	12.2638	-1.48723	-1.63099
		evglcl|G0WVJSS01D03WP	mucin-5AC-like	44.0253	48.6878	23.2502	7.69868	15.9022	12.7651	-1.64142	-1.38789	-2.19416
		evgTRINITY_BU_DN79997_c5_g2_i1	mucin-5AC-like	84.864	123.65	48.536	25.9937	30.819	21.3618	-1.70222	-1.70197
		evglcl|G0WVJSS01BU4RS	mucin-5AC-like	93.6073	170.977	66.0894	17.8678	31.4306	16.7107	-2.30417	-2.18484	-2.63633
		evgTRINITY_DN97442_c0_g1_i1	TLR 4	125.474	118.637	181.085	161.587	204.724	204.242		0.529641
		evgTRINITY_GG_454Uninf_9282_c1_g1_i1	TLR 8 (Bp v1)	42.5017	40.8601	23.7393	12.8881	8.18895	15.4945	-1.52006	-1.5349
		evgTRINITY_DN90786_c12_g1_i1	TLR 5	82.6532	43.0118	144.075	149.934	187.717	264.976		1.32102
		evgTRINITY_DN93274_c7_g1_i8	TLR 8 (Bp v2)	38.0404	56.2829	3.59526	0	0.475706	0.72413	-5.37721	-4.79419
	Stress response, detoxification, chaperones	evglcl|HJ4YRIA01ERORD	alpha-crystallin B chain-like (Bp v1)	193.189	205.871	263.036	110.314	134.217	118.832	-0.863512	-0.79803	-0.982761
		evglcl|G0WVJSS01ASEYP	alpha-crystallin B chain-like (Bp v2)	28.1917	92.5255	20.1705	5.52347	3.03263	2.07027		-3.96193
		evgTRINITY_DN88119_c2_g1_i1	alpha-crystallin B chain-like (Bp v2)	5543.63	7319.56	2393.65	112.901	625.053	140.435	-4.11662	-3.75652	-5.5758
		evglcl|HJ4YRIA02JQMCN	alpha-crystallin B chain-like (Bp v2)	690.951	1191.86	467.331	29.746	80.0376	5.36599	-4.33713	-4.20294	-4.7597
		evgTRINITY_DN64857_c1_g1_i1	amine oxidase [copper-containing] (Bp v3)	2364.07	2368.09	2060.67	1508.66	1693.84	1072.26	-0.668022		-0.567981
		evgTRINITY_DN89032_c5_g1_i1	amine oxidase [copper-containing] (Bp v1)	33.8579	5.81555	37.0101	47.3885	96.8402	63.1293		1.62204
		evgTRINITY_BU_DN80986_c6_g1_i1	amine oxidase [copper-containing] (Bp v1)	92.4023	0	100.205	133.006	177.532	181.311		1.47141
		evgTRINITY_GG_115_c1_g1_i1	amine oxidase [copper-containing] (Bp v2)	67.3674	64.4247	51.629	70.0805	133.011	98.0361		0.913913
		evgTRINITY_BU_DN85312_c0_g1_i1	glutathione transferase subfamily protein	1.49373	60.726	0	0	0	0	-5.7421
		evgTRINITY_DN99899_c0_g1_i1	glutathione S-transferase 7 (Bp v1)	228.063	434.585	393.734	1598.44	187.887	1260.24			2.19588
		evglcl|G0WVJSS01ERVHV	glutathione S-transferase 7 (Bp v2)	4.26212	19.296	9.38469	49.7268	3.77167	27.6469			2.17728
		evglcl|G0WVJSS01A5WRN	glutathione S-transferase 7 (Bp v2)	2.23064	13.9224	20.6728	50.7756	12.1815	49.5751			2.02374
		evgTRINITY_DN92288_c24_g1_i1	glutathione S-transferase C-terminal domain-containing protein-like	96.1167	130.036	101.223	185.934	99.6605	182.991			0.792011
		evgTRINITY_DN91941_c15_g1_i4	glutathione S-transferase omega-1-like (Bp v1)	296.038	248.022	277.39	396.199	206.847	458.439			0.550353
		evgTRINITY_BU_DN79159_c0_g1_i2	glutathione S-transferase omega-1-like (Bp v2)	156.543	154.717	97.1117	60.6572	54.4259	105.203			-1.14857
		evgTRINITY_DN41740_c0_g1_i1	60 kDa heat shock protein, mitochondrial-like	1810.4	2373.91	1740.79	2996.35	1519.71	2829.68			0.616568
		evgTRINITY_GG_25613_c6_g1_i1	heat shock protein 70 A1-like	420.237	750.206	508.888	111.868	174.143	150.396	-1.94125	-1.79044	-2.33243
		evgTRINITY_DN85267_c1_g1_i1	heat shock 70 kDa protein cognate 3	0	1.16311	277.496	0	0	0	-7.88407	-7.39092	-7.46575
		evgTRINITY_GG_21286_c7_g1_i1	stress-70 protein, mitochondrial-like [	1346.74	1694.88	1297.8	2226.35	1137.53	1757.91			0.639129
		evgTRINITY_DN89688_c2_g1_i2	Major vault protein	12.3781	214.443	0	0	0.849476	0		-6.36069
		evglcl|G0WVJSS01A9G85	Soma ferritin (Bp v1)	715.369	893.432	694.441	457.881	573.931	516.147	-0.572936		-0.728209
		evglcl|HJ4YRIA02GP3FD	Soma ferritin (Bp v1)	8681.36	9319.05	6798.87	3495.68	3789.63	3730.28	-1.17067	-1.13773	-1.23083
		evglcl|HJ4YRIA01CJRD3	Soma ferritin (Bp v1)	69.5681	70.3217	62.9567	23.2436	13.77	26.1151	-1.6656
		evglcl|HJ4YRIA02H5KOX	Soma ferritin (Bp v1)	27.644	42.6513	28.7357	0	12.7591	11.8275	-1.95928
		evglcl|G0WVJSS01BVOQE	Soma ferritin (Bp v1)	8.49436	31.3924	21.6244	2.87438	2.30208	5.44026	-2.40942
		evglcl|G0WVJSS01CGQQU	Soma ferritin (Bp v1)	17.5165	20.2265	7.8382	8.26579	1.49508	2.64586		-2.52635
		evglcl|HJ4YRIA02JS5J3	Soma ferritin (Bp v2)	247.492	63.0988	243.407	0.27967	0	1.98672		-6.85331
		evglcl|HJ4YRIA01DCBF8	Soma ferritin (Bp v1)	0	7.15313	13.6276	28.9536	2.21713	9.46011			2.01084
		evglcl|G0WVJSS01CAH0T	Soma ferritin (Bp v1)	1359.44	1647.58	1429.91	965.777	1281.41	1097.11			-0.596267
		evglcl|G0WVJSS01EAWII	Soma ferritin-like	0	3.03572	12.0547	23.096	15.0952	36.4572	2.22017		2.10633
CELL AND TISSUE STRUCTURE, SHAPE, MOBILITY	Cytoskeleton, biomineralization, tissue growth	evgTRINITY_DN91247_c14_g1_i3	beta-actin	1.99164	55.8293	13.2179	0.77686	0.849476	0.928372	-4.27162	-4.10931
		evgTRINITY_DN70999_c0_g2_i1	collagen alpha-3(VI) chain-like	58.8332	108.588	51.4704	21.6666	19.0962	15.476	-1.93829	-2.04774
		evgTRINITY_BU_DN80783_c2_g2_i1	collagen alpha-3(VI) chain-like isoform X3	4.42145	0	9.25251	21.8764	32.0507	8.36463			2.21251
		evglcl|G0WVJSS01CVX53	collagen alpha-4(VI) chain-like	1.99164	13.5153	3.96536	31.1987	22.7659	64.4754			2.2417
		evgTRINITY_DN74222_c0_g1_i1	collagen alpha-6(VI) chain-like (Bp v1)	25.3835	4.65244	0	123.521	513.856	244.004	4.82114	5.12455	3.57086
		evgTRINITY_DN81321_c0_g1_i1	collagen alpha-6(VI) chain-like (Bp v2)	842.904	960.776	397.739	164.096	231.142	148.363	-2.01545	-1.96207
		evgTRINITY_GG_454Uninf_549_c1_g4_i1	collagen alpha-1(XII) chain-like (Bp v1)	12.8561	4.46634	0	47.202	212.768	159.012	4.50482	4.90106	2.97512
		evgTRINITY_DN91993_c9_g1_i1	collagen alpha-1(XII) chain-like (Bp v1)	530.285	149.564	0	689.603	2835.35	2575.12		3.57238
		evgTRINITY_DN105071_c0_g1_i1	collagen alpha-1(XII) chain-like (Bp v2)	41.3266	99.5739	62.732	35.4015	22.732	16.0051		-1.78656
		evgTRINITY_DN71246_c1_g1_i1	collagen alpha-1(XII) chain-like, partial	26.459	9.53751	2.47174	57.0914	56.5071	96.2722	2.41212	2.51507	2.08718
		evgTRINITY_DN93113_c17_g1_i1	collagen alpha-1(XIV) chain-like (Bp v1)	1564.84	2221.39	1245.12	311.521	643.053	414.778	-1.87655	-1.67184	-2.44072
		evgTRINITY_DN18335_c0_g1_i1	collagen alpha-1(XIV) chain-like (Bp v2)	84.7843	94.6656	155.971	236.942	167.347	110.476			1.08169
		evgTRINITY_BU_DN79644_c4_g1_i1	collagen alpha-1(XXI) chain-like (Bp v1)	0	1.16311	0	6.21488	473.506	0	7.67835
		evglcl|G0WVJSS02JAEZU	profilin-4-like isoform X2	0	7.73469	10.0059	30.9889	13.8125	34.3498	2.08573		2.36472
		evgTRINITY_DN79465_c0_g1_i1	beta-tubulin	1.99164	138.41	0	0.77686	0	0	-6.17361	-6.41989
		evgTRINITY_BU_DN80594_c0_g1_i1	tubulin alpha-1A chain-like	238.33	259.013	203.066	178.375	109.965	166.838		-0.751761
		evgTRINITY_DN93267_c1_g2_i1	dentin sialophospho isoform	142.403	1.16311	1.32179	0	0	0	-6.94613	-6.46928	-6.56845
ENERGY, METABOLISM, AND HYDROLYTIC ENZYMES	ATP biosynthesis	evglcl|HJ4YRIA01EX5T1	ATP synthase F0 subunit 6	32.1252	93.8165	50.1618	236.398	32.2291	48.461			2.00982
		evglcl|HJ4YRIA01AJEAV	ATP synthase F0 subunit 6	108.106	71.636	97.3232	225.67	33.7836	79.6172			1.30042
		evglcl|G0WVJSS01DTDSW	ATP synthase subunit g, mitochondrial-like	1.2149	4.74549	0	11.4198	21.2114	19.2916	2.89391
		evgTRINITY_BU_DN25792_c0_g1_i1	synthase of mitochondrial ATP synthase	13.9415	147.715	6.60894	1.55372	0	0.928372	-5.53024	-5.84842
		evglcl|HJ4YRIA01BGX0K	cytochrome b-like	2.11114	9.96786	5.40611	22.8708	17.7455	36.2065	2.06291
		evglcl|G0WVJSS02GZGXQ	cytochrome b5-like	198.318	211.5	178.428	330.748	234.09	323.528			0.775389
		evglcl|G0WVJSS01EY1WE	cytochrome c oxidase subunit 5A	34.7442	47.7806	62.8907	160.53	93.5613	109.529	1.31524	1.06369	1.74145
		evglcl|HJ4YRIA01DUK57	cytochrome c oxidase subunit I	51.8325	67.6698	42.3633	7.40347	3.34693	8.10469	-3.02438	-3.09483	-2.69541
		evglcl|HJ4YRIA02IORYQ	cytochrome c oxidase subunit III	93.9857	104.878	63.5912	239.413	23.7174	50.03			1.4701
		evgTRINITY_DN45158_c0_g2_i1	cytochrome c oxidase subunit XV assembly protein	0	1.16311	452.051	0	0	0	-8.58341	-8.0911	-8.16821
		evgTRINITY_BU_DN56876_c0_g1_i1	phosphoglycerate kinase	19.9164	103.517	7.93073	0.77686	0	0.928372	-5.51939	-5.45084	-5.19318
	Carbohydrate metabolism	evgTRINITY_DN78292_c0_g1_i1	acidic mammalian chitinase-like (Bp v1)	22.9039	3.48933	1.32179	166.077	157.943	114.96	3.92892	3.8161	4.12616
		evgTRINITY_DN102324_c0_g1_i1	acidic mammalian chitinase-like (Bp v2)	128.461	6.97866	17.1832	540.694	369.522	883.81	3.54496		3.35607
		evgTRINITY_DN92909_c10_g1_i1utrorf	chitinase domain-containing protein 1-like	381.4	323.345	252.461	586.529	322.801	517.103			0.888948
		evgTRINITY_DN90418_c1_g1_i2	chitinase-3-like protein 1-like (Bp v1)	2.98747	0	1.32179	78.4628	107.034	80.7684	5.6053	5.65724	5.51279
		evgTRINITY_DN80537_c0_g3_i1	chitinase-like protein PB1E7.04c	156.713	75.2416	109.47	15.2498	60.678	26.9785	-1.71872		-2.88074
		evglcl|G0WVJSS02IAGJC	endoglucanase-like (Bp v1)	14.3199	2.32622	0	19.0408	68.6376	57.262		3.41026
		evglcl|G0WVJSS02GJB65	endoglucanase-like (Bp v1)	17.1082	2.32622	0	16.4539	35.0833	44.042		2.5346
		evgTRINITY_DN45529_c0_g1_i1	endoglucanase-like (Bp v2)	445.212	69.6122	3.96536	547.585	1572.51	1570.95		3.17734
		evgTRINITY_BU_DN81737_c2_g1_i1	maltase-glucoamylase, intestinal-like	259.272	305.817	348.754	383.979	444.802	429.483		0.5219
	Transport	evglcl|G0WVJSS01ALWK9	ADP,ATP carrier protein-like	6.99067	13.7014	8.78989	85.9362	162.53	109.817	3.55112	3.72257	3.12306
		evgTRINITY_DN83909_c4_g1_i1	haemoglobin type 1	16484.1	26644.5	34874.4	12578.2	9588.08	4681.22		-1.87792
		evgTRINITY_DN83909_c2_g1_i1	haemoglobin type 1	581.391	740.506	1223.91	462.705	247.75	124.337		-2.19908
		evgTRINITY_DN83909_c1_g1_i1	haemoglobin type 2	1207.15	147.203	5422.03	413.833	102.685	21.7146		-5.30119
		evglcl|G0WVJSS02H1ED4	hemoglobin, partial	346.008	583.114	603.845	308.996	218.069	100.756		-1.68468
		evglcl|G0WVJSS02IIU1G	hemoglobin, partial	1111.2	1864.65	2285.79	919.173	621.12	360.431		-1.84677
		evgTRINITY_DN90083_c1_g1_i1	hemoglobin type 1	0	9.30489	23.7922	57.4876	4.24738	6.4986			2.31604
		evgTRINITY_DN90083_c2_g1_i1	hemoglobin type 1	12.4976	145.389	153.195	394.948	33.979	69.6279			1.88761
		evgTRINITY_DN91496_c1_g1_i1	proton myo-inositol co-transporter-like isoform	186.039	221.235	305.478	305.384	500.341	427.979		0.964635
TRANSCRIPTION/TRANSLATION REGULATION, CELL SIGNALING	Apoptosis	evgTRINITY_DN90441_c3_g1_i2	Glyceraldehyde-3-phosphate dehydrogenase	38.2196	130.28	10.7065	0	0.849476	0		-5.92212
		evgTRINITY_BU_DN16132_c0_g1_i1	Glyceraldehyde-3-phosphate dehydrogenase	61.741	176.793	14.5397	0	0.849476	0		-6.40702
		evgTRINITY_DN82953_c3_g1_i1	Glyceraldehyde-3-phosphate dehydrogenase	74.6867	642.037	14.5397	1.55372	0	0			-7.25632
		evgTRINITY_DN66708_c0_g1_i1	Glyceraldehyde-3-phosphate dehydrogenase-like	67.7159	126.779	56.8369	6.21488	11.8927	38.0633	-2.13838		-3.62545
		evgTRINITY_DN89686_c7_g1_i1	WD repeat and HMG-box DNA-binding protein 1-like isoform X1	75.6825	69.7866	39.6536	153.041	46.7212	166.179			1.32173
		evgTRINITY_DN93353_c12_g1_i1	WD repeat-containing protein 43-like	277.834	296.593	232.635	396.975	321.102	361.137			0.581533
		evgTRINITY_DN14883_c0_g1_i1	Calreticulin	48.7953	502.464	2.64358	0.77686	1.69895	2.78512	-6.42827		-7.44145
		evglcl|G0WVJSS02HAATA	Calreticulin-like	56.6921	48.1179	23.1577	123.808	40.9702	71.9395			1.54117
		evglcl|G0WVJSS01DIBSR	Calreticulin-like	268.972	373.033	237.486	602.688	183.801	578.97			1.05392
		evgTRINITY_GG_14633_c22_g1_i1	Calreticulin-like	6965.87	9536.77	5457.54	15033.9	4208.91	11904.8			1.04689
		evgTRINITY_BU_DN6973_c0_g1_i1	zinc carboxypeptidase A 1-like	8.91261	0	17.1832	38.843	129.12	34.2848			2.09481
		evgTRINITY_BU_DN25201_c0_g1_i1	carboxypeptidase Ylike protein	8.9624	79.8708	0	0	0.849476	0		-4.99586
		evgTRINITY_DN18455_c0_g1_i1	glutamate carboxypeptidase 2-like	910.181	557.13	712.444	281.223	412.845	223.738	-1.24683	-1.19465
		evgTRINITY_DN76199_c1_g1_i1	lysosomal Pro-X carboxypeptidase-like isoform X1	266.88	303.572	393.893	410.959	717.807	540.312		0.96506
		evgTRINITY_DN79814_c0_g2_i1	probable serine carboxypeptidase CPVL	563.834	740.273	632.145	548.999	423.939	342.755		-0.751199
		evgTRINITY_DN94571_c0_g1_i1	Cathepsin L-like	80.6616	111.659	387.284	1003.7	148.658	227.451			2.33369
		evgTRINITY_DN102317_c0_g1_i1	Cathepsin L	11.9499	124.453	0	0.77686	0	0			-5.42702
		evgTRINITY_DN77781_c0_g2_i1	Cathepsin L1	5.96497	11.6311	24.7703	12.2355	39.0759	30.6363		1.28395
		evgTRINITY_DN61331_c0_g1_i1	Cathepsin Z-like	87.6323	97.7013	50.2279	178.678	163.057	132.757	1.00664	0.909191	1.19783
	Cell proliferation, migration, differentiation, cell cycle regulation	evgTRINITY_DN93448_c4_g1_i2	Epidermal growth factor-related protein	29.1178	41.651	47.8091	98.8865	75.8667	158.38			1.34448
		evgTRINITY_GG_4472_c3_g1_i1	Epidermal growth factor-related protein	172.277	296.593	219.417	446.694	413.695	791.901			0.9717
		evgTRINITY_GG_6717_c17_g2_i2	Epidermal growth factor-related protein	183.869	230.296	252.342	66.6701	169.436	84.9089			-1.70879
		evgTRINITY_GG_454Uninf_10175_c2_g2_i1	multiple epidermal growth factor-like domains protein 11 (Bp v1)	10.735	6.85072	4.74522	22.6688	32.7303	50.9026	2.19247	2.4215
		evgTRINITY_BU_DN81377_c4_g1_i2utrorf	multiple epidermal growth factor-like domains protein 11 (Bp v1)	28.2017	23.8321	16.8528	56.4699	83.3845	127.623	1.9389	2.17078
		evgTRINITY_DN93524_c10_g1_i2	multiple epidermal growth factor-like domains protein 11 (Bp v2)	84.0474	28.8219	173.247	260.87	347.07	483.942	1.92775	2.10976
		evgTRINITY_GG_13339_c0_g1_i1	multiple epidermal growth factor-like domains protein 11 (Bp v3)	33.3302	2.54721	18.5976	52.1195	42.5502	49.0459	1.38036
		evgTRINITY_GG_20466_c12_g3_i1	inhibitor of apoptosis	82.4142	59.9235	94.7061	117.718	111.366	135.849	0.61996
		evgTRINITY_DN78330_c1_g1_i1	peptide chain release factor	1282.62	1355.02	1065.36	1775.12	1203.71	1695.21			0.541385
		evglcl|G0WVJSS01CRM7G	Translationally-controlled tumor protein homolog	3.03726	4.73386	4.01823	33.1486	47.5112	44.469	3.28332	3.41901	3.02763
	Cell-to-cell signaling	evgTRINITY_DN94998_c0_g1_i1	Guanylate kinase associated protein	0.995822	0	222.06	0	0	0	-7.5645	-7.07096	-7.14481
		evgTRINITY_DN91985_c11_g1_i8	A disintegrin and metalloproteinase with thrombospondin motifs 2-like isoform X3	75.4734	48.4668	70.6363	66.8566	37.0626	6.53574		-1.54935
		evgTRINITY_DN91754_c3_g1_i1	integrin alpha-4-like	568.107	642.037	512.854	878.628	843.529	1036.99	0.678931	0.70986	0.632635
		evgTRINITY_DN20647_c0_g1_i1	zinc metalloproteinase/disintegrin-like	663.217	529.215	157.293	80.7934	67.9581	114.19	-2.35463
	Nucleic acid biosynthesis, metabolism, and repair	evgTRINITY_GG_454Uninf_8141_c0_g1_i1	deoxyribonuclease-1-like	286.757	380.128	57.6564	10.7595	12.7336	39.3351	-3.50299	-3.2276	-4.56124
		evgTRINITY_GG_19027_c4_g1_i1	DNA annealing helicase and endonuclease ZRANB3-like	618.405	775.795	561.76	420.281	447.674	317.503	-0.721865	-0.770214
		evglcl|G0WVJSS01AMZOG	DNA annealing helicase and endonuclease ZRANB3-like	131.449	186.098	141.431	114.198	68.8075	82.6251		-1.00796
		evgTRINITY_DN90139_c15_g1_i1	general transcription factor IIH subunit 3-like	307.709	293.104	334.412	202.76	376.318	202.385			-0.598358
		evglcl|G0WVJSS02IMG9C	ribonuclease UK114-like	47.7995	35.0096	21.7302	109.537	22.0864	85.4102			1.65945
		evgTRINITY_DN74969_c0_g1_i1	ATP-dependent RNA helicase DDX56	0	1.16311	589.517	0	0	0		-8.47272
		evgTRINITY_DN67655_c0_g1_i1	ATP-dependent RNA helicase DDX58	265.884	272.435	297.402	421.058	311.758	431.693			0.615605
		evgTRINITY_DN92857_c14_g1_i1	ATP-dependent RNA helicase dbp2-like	473.015	376.848	416.363	600.513	478.255	584.874			0.522682
	Protease	evgTRINITY_GG_454Uninf_1376_c0_g4_i1	chymotrypsin-like elastase family member 1	4.37166	0	5.53829	66.1807	158.206	58.3946	4.6778	4.77783	4.22048
		evgTRINITY_DN89061_c3_g1_i1utrorf	dipeptidase 1-like	60.7451	10.468	66.0894	284.401	280.123	307.625	2.65678	2.67359	2.61423
		evgTRINITY_DN92814_c7_g1_i1	putative N-acetylated-alpha-linked acidic dipeptidase	222.875	216.339	68.733	357.045	1213.81	883.077		2.61735
		evgTRINITY_BU_DN82229_c0_g1_i1	heparanase-like isoform X1	287.793	2.32622	58.1587	830.463	302.413	1114.97			2.74772
		evglcl|G0WVJSS01EKDHJ	BPTI/Kunitz domain-containing protein 4-like, transcript variant X2	8.9624	16.2835	11.8961	23.5155	66.7603	39.2144		2.04969
		evgTRINITY_GG_21300_c2_g1_i1	kunitz-type serine protease inhibitor 2-like	11276.3	1075.81	12739.4	137.955	550.231	1697.96			-6.18996
		evgTRINITY_BU_DN80352_c10_g1_i1	disintegrin and metalloproteinase domain-containing protein 17-like	77.6741	54.6662	129.535	11.6529	35.678	13.9256	-2.07483		-2.87849
		evgTRINITY_DN54206_c0_g1_i1	serine protease 56-like	8240.43	11470.6	2455.88	1082.94	770.474	929.3	-2.9933	-3.1577
		evgTRINITY_DN97272_c0_g1_i1	serine protease K12H4.7	388.371	359.401	306.655	519.719	531.772	531.029	0.585225	0.597041	0.581683
		evgTRINITY_DN102331_c0_g1_i1	serpin B6-like	483.352	137.235	7.28305	941.888	5526.58	3506.99		4.40483
		evgTRINITY_DN12476_c0_g1_i1	tyrosinase-like protein tyr-1	146.535	69.7866	13.8391	438.708	1868.54	1546.07	4.05843	4.46413	2.47702
		evgTRINITY_BU_DN75459_c0_g1_i1	tyrosinase-like protein tyr-3 isoform X1	558.656	73.276	25.114	13.2066	13.5916	2.78512		-4.80492
	Protease inhibitor	evglcl|G0WVJSS02G429N	Serine proteinase inhibitors Serpin B3-like	50.7969	24.6812	0	323.927	3311.7	1471.12	6.05807	6.47394	3.67276
		evgTRINITY_DN99755_c0_g1_i1	serpin B3-like	31.8663	11.6311	11.8961	34.9587	316.854	149.468		3.5772
		evgTRINITY_DN73989_c0_g1_i1	cyclin-dependent kinase 8 or 19	0.995822	0	477.165	0	0	0		-8.16835	-8.24588
	Protein modification, biosynthesis	evglcl|G0WVJSS02GMBGM	arginine kinase	224.329	411.195	363.637	706.974	368.808	313.697			1.09247
		evgTRINITY_BU_DN79863_c0_g2_i1	bifunctional glutamate proline-tRNA synthetase	1286.18	827.193	1092.21	2128.57	955.703	1839.38			0.997375
		evgTRINITY_DN92972_c14_g1_i1	E3 ubiquitin-protein ligase XIAP-like	21.8782	31.625	22.5629	36.9475	65.3502	45.8152		1.12199
		evgTRINITY_DN90727_c11_g2_i1	translation elongation factor, EF-1, alpha subunit	18.9206	151.204	11.8961	0.77686	0.849476	0.928372	-5.61455	-5.47126	-5.72855
		evgTRINITY_DN89772_c3_g1_i1	17-beta-hydroxysteroid dehydrogenase type 6-like	683.134	710.661	762.671	484.761	942.629	525.459			-0.548483
		evgTRINITY_DN94652_c0_g1_i1	betaine--homocysteine S-methyltransferase 1-like	80.2234	13.9573	113.264	355.747	295.312	524.094	2.49529	2.53419	2.32965
		evglcl|G0WVJSS01BBXHH	betaine--homocysteine S-methyltransferase 1-like	7.46867	2.98919	14.6983	29.3575	21.908	39.7343	1.80723		1.79247
		evgTRINITY_GG_16258_c9_g1_i1	phosphoethanolamine N-methyltransferase 3-like	26.8872	31.404	27.7575	109.537	40.7748	57.5591			1.94938
		evgTRINITY_DN93212_c12_g2_i1	histone-lysine N-methyltransferase SUV39H2-like, partial	52.7786	39.5458	34.3665	92.4152	30.5811	98.4167			1.1498
		evgTRINITY_DN91871_c9_g1_i1	protein-L-isoaspartate O-methyltransferase domain-containing protein 1-like	872.728	628.65	967.549	314.628	744.956	449.332			-1.3914
		evgTRINITY_DN84195_c0_g2_i1	Ornithine decarboxylase-like	3.98329	3.48933	3.96536	38.843	41.6243	19.1245	2.99708	2.82899	3.28698
		evgTRINITY_DN16091_c0_g1_i1	peptidyl-prolyl CIS-trans isomerase c	9828.06	8938.42	7620.48	14080.3	5490.48	12580			0.692979
		evgTRINITY_GG_2379_c8_g1_i1	basic phospholipase A2 CM-III-like	0	3.48933	1.32179	4.66116	0.849476	102.919		4.41895
		evgTRINITY_DN90039_c20_g1_i1	group XV phospholipase A2-like	53.7744	48.8506	79.3073	73.8017	119.776	92.8372		0.807401
		evgTRINITY_DN91766_c9_g1_i1	N-acyl-phosphatidylethanolamine-hydrolyzing phospholipase D-like	160.327	129.105	199.59	75.3554	106.184	82.6251	-0.885497
		evgTRINITY_DN74667_c0_g1_i1	phospholipase A2-like, partial	33.8579	15.1204	23.7922	66.0331	44.1727	25.9944			1.44723
		evgTRINITY_BU_DN80498_c7_g2_i1	secretory phospholipase A2 receptor-like	189.873	173.78	57.7357	411.013	972.098	1455.6		3.09098	1.53496
		evgTRINITY_DN86546_c0_g1_i1	threo-3-hydroxyaspartate ammonia-lyase	16.929	24.4253	6.60894	53.6033	13.5916	33.4214			1.75375
	Signal transduction	evgTRINITY_GG_24251_c6_g1_i1	ankyrin-3-like (Bp v1)	92.6114	71.3685	60.8022	163.141	60.3128	121.58			1.13741
		evglcl|G0WVJSS01B1MBQ	ankyrin-1-like	99.7017	1.11659	0	0	0	0	-6.42806	-5.95343	-6.0547
		evgTRINITY_DN64922_c0_g1_i1	ankyrin-3-like (Bp v2)	131.648	90.9785	67.3583	6.66546	26.7245	5.31029	-2.86794	-2.55436	-3.72188
		evgTRINITY_DN91005_c3_g1_i1	F-box-like/WD repeat protein repeat are of protein	211.114	236.111	252.435	155.372	259.09	182.889			-0.561077
		evgTRINITY_DN93193_c19_g1_i1	Frizzled	28.8788	45.3613	46.2626	90.8926	56.0654	81.6967			1.20165
		evglcl|G0WVJSS01CRU3P	Guanine nucleotide-binding protein Rho	43.7664	95.1541	83.0347	8.92612	22.1119	42.7887			-2.95664
		evglcl|G0WVJSS01A3Y42	Guanine nucleotide-binding protein Rho	21.5695	0.0348933	75.8838	47.0699	158.945	117.708		2.06526
		evgTRINITY_DN80560_c0_g1_i1	Guanine nucleotide-binding protein-like 3 homolog	3.98329	1.16311	1.32179	121.05	143.035	276.822	6.14641	6.29761	5.64038
		evgTRINITY_BU_DN81400_c11_g1_i1	guanylate cyclase soluble subunit alpha-2-like	47.8592	27.1354	29.0793	14.9312	8.07002	0	-2.1217	-2.9151
		evglcl|G0WVJSS02I63F8	poly-ubiquitin	84.7046	115.276	114.665	51.0086	52.0134	73.4249	-0.830261		-1.00404
		evgTRINITY_DN92923_c4_g1_i1	E3 ubiquitin-protein ligase XIAP-like	184.227	129.105	158.615	254.81	238.703	195.886			0.706964
		evgTRINITY_DN92245_c0_g1_i1	E3 ubiquitin-protein ligase Smurf1-like (LOC106074649), transcript variant X7	649.276	650.179	749.454	442.81	778.969	587.659			-0.607397
		evgTRINITY_DN85164_c0_g2_i1	E3 ubiquitin-protein ligase FANCL-like	183.231	239.601	185.05	117.306	246.348	152.253			-0.76363
		evgTRINITY_DN66729_c0_g2_i1	E3 ubiquitin-protein ligase TRIM9	0	0.581555	259.52	0	0	0		-7.29266	-7.36875
REPRODUCTION, NEUROPEPTIDES, HORMONES, MONOAMINES		evgTRINITY_DN89437_c16_g1_i1	Sodium- and chloride-dependent glycine transporter 2-like (Bp v1)	103.565	5.81555	208.842	461.455	247.197	482.753	1.90063		2.04522
		evgTRINITY_GG_5765_c0_g2_i1	Tyramine beta-hydroxylase-like/dopamine beta-hydroxylase-like (Bp v2) (fragmented with evgTRINITY_DN91984_c20_g1_i1)	267.876	212.849	220.739	356.579	473.158	430.765	0.844478	0.950907	0.623999
		evgTRINITY_DN93032_c13_g1_i3	Neuropeptide Y receptor type 5-like	32.8621	54.6662	48.9061	73.0248	68.782	90.0521	0.759919
		evgTRINITY_DN91171_c7_g1_i1	Tyramine beta-hydroxylase-like/dopamine beta-hydroxylase-like (Bp v3)	372.437	217.502	301.368	475.438	448.523	503.178	0.678413
		evgTRINITY_GG_454Uninf_5136_c1_g1_i1	FMRF-amide receptor-like	27.883	33.7302	56.8369	43.5042	82.3991	86.3386		1.09194
		evgTRINITY_DN97070_c0_g1_i1	Insulin-like peptide 7	85.1527	76.6257	50.2147	39.6199	34.6756	39.2516	-0.893794	-0.920104
		evgTRINITY_DN82526_c2_g1_i1	Pedal peptide 2	140.64	116.695	95.2348	82.2306	55.1904	34.3498	-1.03235	-1.37887
		evglcl|G0WVJSS02ISYXO	Ovipostatin 2	21.4102	23.6111	9.25251	4.66116	6.17569	5.05963	-1.69901
		evgTRINITY_DN82212_c0_g1_i1	pheromone Alb-1-like (maybe; %ID low)	132.444	46.5244	109.708	30.2975	22.0864	32.493	-1.75192	-1.80669
		evgTRINITY_GG_26904_c0_g1_i1	sodium-dependent nutrient amino acid transporter 1-like	18.9206	16.2835	7.93073	2.33835	3.44038	1.85674	-2.32908		-2.18742
		evgTRINITY_DN90255_c11_g1_i1	Tyramine beta-hydroxylase-like/dopamine beta-hydroxylase-like (Bp v1)	7313.04	7443.92	3176.76	452.132	2435.92	340.239	-2.4734		-3.78376
		evglcl|HJ4YRIA02HU27T	Schistosomin	25.0549	42.9769	11.2748	2.25289	2.03025	0	-3.87981	-4.04699	-3.19408
		evgTRINITY_DN91984_c8_g2_i1	Tyramine beta-hydroxylase-like/dopamine beta-hydroxylase-like (Bp v2)	9673.42	7556.73	2186.24	571.769	197.078	517.103	-3.91513	-4.21705
		evglcl|G0WVJSS01DLW51	Temptin-like isoform 1	4.42145	4.83854	0	45.0889	9.32724	11.419			3.78472
		evgTRINITY_BU_DN82444_c14_g1_i1	Tyramine beta-hydroxylase-like/dopamine beta-hydroxylase-like (Bp v2)	28.4208	16.1672	42.0196	81.2984	45.7782	57.2805			1.48934
		evgTRINITY_DN93358_c13_g1_i1	Tyramine beta-hydroxylase-like/dopamine beta-hydroxylase-like	71.8685	85.4654	63.3268	183.386	94.1814	166.504			1.33973
		evglcl|G0WVJSS01AOFRL	Bursicon alpha	12.0694	25.2977	8.67093	1.01769	17.2868	10.9084			-3.10622
		evgTRINITY_DN90548_c21_g1_i1	FMRF-amide isoform X2 (fragmented with evgTRINITY_DN90548_c16_g1_i1)	122.486	105.843	107.065	97.8843	53.517	77.9832		-0.756536
		evgTRINITY_DN90548_c16_g1_i1	FMRF-amide isoform X2 (fragmented with evgTRINITY_DN90548_c21_g1_i1)	428.203	402.436	292.115	279.67	200.476	230.236		-0.796221
		evglcl|G0WVJSS01AMMU4	PTSP-like	98.2378	138.561	100.628	84.1805	67.4824	50.7077		-0.920056
		evgTRINITY_DN92173_c7_g1_i1	Type 1 serotonin receptor 5HT-1Hel	60.7451	83.744	55.5151	55.157	35.678	20.4242		-1.22812
		evglcl|G0WVJSS01DVLY2	B. pfefferi Enterin	71.4303	40.9531	45.0333	36.66	16.5563	17.5184		-1.58488

## Sheet: 3d
CATEGORY		B. PFEIFFERI CDS	GENE OF INTEREST	NORMALIZED READ COUNTS						LOG2 FOLD CHANGE
				Control			3d			3v3 All 3	3v2 R1,R3	3v1 R2 only
				R1	R2	R3	R1	R2	R3
IMMUNE, STRESS, DEFENSE	Cell adhesion	evgTRINITY_GG_21077_c17_g1_i1	cadherin-23-like	0	0	0	3.08	175.61	0	7.15
		evgTRINITY_DN89350_c16_g1_i1	protocadherin Fat 4-like (Bp v2)	76.53	34.13	88.68	142.69	1474.74	128.26		1.01	4.44
		evgTRINITY_DN93251_c15_g1_i1	protocadherin Fat 4-like (Bp v1)	3738.47	3286.71	2725.07	790.43	1283.79	840.67	-1.74	-2.01
		evgTRINITY_DN86761_c0_g2_i1	protocadherin Fat 3-like	4.86	0	8.29	3.08	30.69	3.09			2.7
		evgTRINITY_DN86761_c1_g2_i1	protocadherin Fat 3-like	12.76	5.69	19.06	21.56	73.31	13.91			2.5
		evgTRINITY_DN88337_c1_g1_i1	cadherin-related tumor suppressor-like isoform X2	127.55	100.98	144.21	55.43	63.08	60.27	-1.05	-1.11
		evgTRINITY_DN72929_c1_g1_i1	arbonyl reductase [NADPH] 1-like (Bp v1)	34.01	49.34	50.44	195.92	418.43	112.5	2.43	1.76	3.2
		evgTRINITY_DN83767_c2_g1_i1	arbonyl reductase [NADPH] 1-like (Bp v2)	19.44	12.8	24.86	65	64.14	71.19	1.79	1.81	1.72
		evgTRINITY_DN87865_c0_g2_i1	putative carbonyl reductase	0	0.71	246.15	0	0	0	-7.61	-7.48
		evgTRINITY_DN83441_c2_g1_i1	catalase-like	317.42	235.14	396.57	430.42	738.22	525.42			1.18
		evgTRINITY_GG_10644_c0_g1_i1	caveolin-1-like (Bp v1)	483.06	615.96	527	276.92	246.27	212.16	-1.14	-1.16	-1.17
		evgTRINITY_GG_13848_c0_g2_i2	caveolin-1-like (Bp v1)	349.13	284.77	271.54	82.42	79.33	69.25	-1.96	-2	-1.95
		evglcl|HJ4YRIA01DSB7G	caveolin-1-like (Bp v2)	435.61	308.99	296.19	97.22	70.7	72.92	-2.11	-2.04
		evgTRINITY_DN99929_c0_g1_i1	caveolin-1-like (Bp v3)	878.89	917.32	985.44	789.4	189.24	808.21			-2.31
		evgTRINITY_DN94484_c0_g1_i1	dermatopontin 2 (Bp v2)	1113.53	1082.34	16.22	21326.4	28.98	22521.6	4.31	4.88
		evglcl|G0WVJSS01D4G0J	dermatopontin 2 (Bp v2)	147.72	64.33	1.83	1579.57	0	1712.53	3.94	4.51
		evglcl|G0WVJSS01CHX23	dermatopontin 2 (Bp v1)	3.53	7.32	0	91.1	0	61.8	3.67	4.25
		evgTRINITY_DN93533_c21_g1_i1	dermatopontin 2 (Bp v2)	0	4.27	6.63	6.16	20.46	9.7			2.38
		evgTRINITY_GG_454Uninf_9505_c0_g22_i1	dermatopontin 3 (Bp v1)	35.76	17.46	0	751.65	0	766.83	4.8	5.38
		evglcl|G0WVJSS02H57GM	dermatopontin 3 (Bp v1)	53.63	34.33	0	905.42	0	888.06	4.33	4.91
		evglcl|G0WVJSS01ED7H4	dermatopontin 3 (Bp v2)	5.3	3.32	0	79.93	0	57.67	3.81	4.4
		evglcl|G0WVJSS02GMWIL	dermatopontin 3 (Bp v1)	8.14	12.89	0	163.01	0	92.78	3.53	4.09
		evgTRINITY_GG_22084_c2_g1_i1	dermatopontin 3 (Bp v1)	0	1.58	9.78	15.61	23.37	20.65	2.27	2.14
		evglcl|G0WVJSS01BPTNZ	dermatopontin 2 or 3	27.33	36.71	0	868	0	779.3	4.66	5.24
		evgTRINITY_DN93699_c0_g1_i1	dermatopontin-like	12.15	59.73	9.95	100.6	9.92	185.44		2.34
		evgTRINITY_DN97280_c0_g1_i1	hemagglutinin/amebocyte aggregation factor-like isoform X1	2.43	14.93	5.8	2.05	218.23	9.27			4.74
		evglcl|G0WVJSS02H4Y5V	mammalian ependymin-related protein 1-like (Bp v2)	1.21	0	0	7.8	2090.84	3.82	9.73
		evglcl|G0WVJSS01D9LJ7	mammalian ependymin-related protein 1-like (Bp v2)	0	0	0	2.84	611.7	1.07	8.93
		evglcl|G0WVJSS02HW3ME	mammalian ependymin-related protein 1-like (Bp v2)	0	0	0	2.84	392.21	1.07	8.29
		evgTRINITY_DN102517_c0_g1_i1	mammalian ependymin-related protein 1-like (Bp v2)	1.21	3.07	4.52	21.42	6953.93	12.58		2.4	11.02
		evglcl|G0WVJSS01AXTJF	ependymin-related protein 1-like	286.44	271.95	344.72	508.26	286.41	475.83		0.7
		evgTRINITY_GG_454Uninf_12265_c0_g1_i1	mammalian ependymin-related protein 1-like (Bp v3)	7.34	13.61	2.69	9.17	2675.18	11.23			8.32
		evglcl|HJ4YRIA01D9WCK	mammalian ependymin-related protein 1-like (Bp v1)	1.99	11.45	2.74	1.94	1439.71	0			7.95
		evgTRINITY_DN66357_c0_g1_i1	fatty acid-binding protein-like	2.43	3.56	0.83	8.21	136.39	13.91			5.68
		evgTRINITY_DN23074_c0_g1_i1	ficolin-2-like (Bp v1)	32.8	4.27	5.78	1668.11	1.7	2698.16	6.63	7.18
		evgTRINITY_DN90820_c12_g1_i1	ficolin-2-like isoform X1	19.53	4.98	4.11	663.45	0	1029.75	5.83	6.39
		evgTRINITY_GG_8561_c37_g1_i1	ficolin-2-like isoform X1	2.92	0	1.69	85.69	1.7	164.16	5.43	5.99
		evglcl|G0WVJSS01AS054	ficolin-1-like	4.11	20	17.95	49.12	22.18	35.34		1.55
		evglcl|G0WVJSS01B1FCE	ficolin-1-like	29.32	36.62	41.85	114.7	67.57	70.17	1.22	1.34
		evglcl|G0WVJSS01EQ2V7	ficolin-2-like (Bp v2)	0.63	0	1.66	8.44	0	16.09		3.47
		evgTRINITY_DN90820_c32_g1_i1	ficolin-2-like isoform X1	2.43	0	4.97	15.4	0	38.63		3.22
		evgTRINITY_DN91788_c11_g1_i1	galectin-4-like	440.24	519.2	624.26	996.18	1979	1089.77	1.36	0.97	1.87
		evglcl|G0WVJSS01BX361	galectin-4-like	21.43	23.79	26.32	48.2	88.02	48.89	1.36
		evglcl|G0WVJSS02HYCA4	galectin-4-like	12.32	10.01	23.25	39.15	0	31.63		1.19
	Cellular defense	evgTRINITY_DN61915_c0_g1_i1	ADAMTS-like protein 3	48.59	45.51	33.15	100.6	93.77	137.54	1.37	1.47	1.12
		evgTRINITY_GG_454Uninf_5315_c0_g1_i1	ADAM family mig-17-like	62.65	66.42	75.48	46.88	24.86	31.46	-0.98
		evgTRINITY_DN85819_c3_g1_i1	ADAM family mig-17-like isoform X1	1015.55	755.9	633.75	163.22	189.24	262.71	-1.96	-1.93
		evgTRINITY_BU_DN80352_c10_g1_i1	Disintegrin and metalloproteinase domain-containing protein 17-like	47.38	33.42	81.22	7.19	11.93	10.82	-2.39	-2.55
		evgTRINITY_GG_3496_c0_g2_i1	ADAM 17-like protease isoform X3	343.98	282.09	335.39	206.33	407.47	208.85		-0.64
		evgTRINITY_DN94852_c0_g1_i1	alkaline phosphatase-like	10.33	6.4	0.83	61.59	6163.23	84.99		3.55	9.93
		evglcl|G0WVJSS02GDG09	C3 and PZP-like alpha-2-macroglobulin domain-containing protein 8	147.06	274.09	50.8	717.27	359.55	399.97	1.64
		evgTRINITY_DN91401_c14_g1_i1	alpha-2-macroglobulin receptor-associated protein-like	98.4	111.64	141.72	219.68	160.26	213.26	0.75	0.87
		evgTRINITY_DN97358_c0_g1_i1	aplysianin-A-like	769.91	1181.09	843.6	5138.73	584.51	3296		2.16
		evglcl|G0WVJSS01DD8KC	aplysianin-A-like	20.61	54.01	29.07	159.17	13.72	90.76		1.82
		evgTRINITY_DN90738_c24_g1_i1	granulin-like protein	2.56	1.1	8.26	11.1	38.79	16.35	2.36
		evglcl|G0WVJSS02I95X0	granulin-like protein	2.3	3.88	6.66	12.63	60.1	3.74			3.7
		evgTRINITY_GG_454Uninf_10064_c1_g1_i1	granulins-like isoform X3	7.63	4.56	14.98	17.29	34.52	2.41			1.87
		evgTRINITY_DN90738_c9_g1_i1	granulins-like isoform X4	166.69	114.91	223.72	206.38	676.42	183.03			1.96
		evgTRINITY_DN90738_c16_g1_i1	granulins-like isoform X3	146.09	182.03	182.43	264.79	616.95	355.6		0.85	1.83
		evgTRINITY_GG_6223_c0_g2_i1	granulins-like isoform X3	234.29	184.64	273.43	329.18	905.27	291.91			1.94
		evgTRINITY_GG_9877_c0_g1_i1	granulins-like isoform X3	22.1	29.66	62.49	38.59	203.38	43.56			2.36
		evgTRINITY_GG_454Uninf_2542_c0_g1_i1	granulins-like isoform X3	213.53	147.7	194.97	301.65	710.23	309.13		0.71	1.9
		evgTRINITY_GG_11393_c0_g1_i1	granulins-like isoform X3	89.01	63.83	81.48	132.46	277.71	111.31		0.63	1.8
		evgTRINITY_DN100090_c0_g1_i1	G-type lysozyme	0	13.89	0	0	5064.18	2.3	8.38
		evglcl|G0WVJSS01B1Z1U	G-type lysozyme	1.82	2.84	0	1.54	1005.81	0			9.02
		evgTRINITY_DN105254_c0_g1_i1	G-type lysozyme	1.21	0	0.83	1.03	513.69	0			8.93
		evgTRINITY_DN81364_c1_g2_i1	GTPase IMAP family member 7-like isoform X1	0.61	11.38	0	4.11	514.88	12.36	5.33
		evgTRINITY_BU_DN80112_c3_g1_i1	GTPase IMAP family member 7-like (Bp v5)	0	1.5	5.07	30.54	18.75	21.71	3.2	3.36
		evgTRINITY_DN92953_c2_g2_i1	GTPase IMAP family member 1-like	3.81	42.67	96.97	139.61	279.6	129.81	1.93		2.43
		evgTRINITY_DN91832_c20_g1_i1	GTPase IMAP family member 7-like (Bp v6)	159.14	168.53	150.7	315.15	400.65	299.8	1.08	0.93	1.3
		evgTRINITY_DN90270_c20_g1_i1	GTPase IMAP family member 4-like (Bp v1)	26.12	80.35	89.28	253.39	1362.95	190.08		1.74	4.35
		evgTRINITY_DN90451_c3_g1_i1	GTPase IMAP family member 7-like (Bp v4)	34.74	78.93	116.86	184.78	583.08	167.51		1.17	2.88
		evgTRINITY_BU_DN81665_c0_g1_i1	GTPase IMAP family member 8-like	0.61	0	99.59	0	0.85	0	-5.58	-6.19
		evgTRINITY_DN100178_c0_g1_i1	GTPase IMAP family member 4-like (Bp v2)	5.47	3.56	4.97	24.64	2366.41	21.63			8.85
		evgTRINITY_DN35869_c0_g1_i1	GTPase IMAP family member 7-like (Bp v2)	1.21	1.42	0.83	2.05	204.59	0			7.07
		evgTRINITY_DN81364_c1_g1_i1	GTPase IMAP family member 7-like isoform X2	3.64	20.62	4.14	6.16	484.19	4.64			5.6
		evglcl|G0WVJSS01DHZ7G	GTPase IMAP family member 8-like	10.33	11.7	9.96	18.2	127.53	2.89			3.52
		evgTRINITY_DN93643_c0_g1_i1	GTPase IMAP family member 7-like (Bp v3)	174.32	265.95	230.4	235.08	1476.45	199.35			2.69
		evgTRINITY_DN17902_c0_g1_i1	GTPase IMAP family member 7-like (Bp v1)	17.14	25.55	20.18	37.24	109.93	38.14			2.35
		evgTRINITY_DN92374_c15_g1_i1	GTPase IMAP family member 4-like isoform X2	70.46	85.05	92.46	96.84	156.14	117.45			0.89
		evgTRINITY_DN92201_c0_g1_i1	histone H4 transcription factor	0	0	0	0	257.37	1.55	7.68
		evgTRINITY_DN84392_c2_g2_i1	histone H1-delta-like	2.87	4.33	0	13.91	9.6	39.42	2.92	3.23
		evgTRINITY_DN14564_c0_g1_i1	histone H1	66.21	170.66	184.82	7.19	1.7	0	-5.38	-5.13
		evgTRINITY_DN45865_c0_g1_i1	histone H2A	4.86	19.91	6.63	30.8	11.93	34		1.59
		evgTRINITY_DN88065_c2_g1_i1	lipase member K-like	43.08	54.46	38.79	69.92	149.98	90.9		0.81	1.69
		evgTRINITY_DN92599_c10_g2_i1	macrophage-expressed gene 1 protein-like	25.51	9.24	31.49	69.8	168.79	89.63	2.29	1.82	2.88
		evgTRINITY_DN92637_c6_g1_i1	multidrug resistance-associated protein 1-like (Bp v4)	33.41	25.6	30.67	436.28	85.25	397.15	3.34	3.77
		evgTRINITY_DN84362_c0_g2_i1	multidrug resistance-associated protein 1-like isoform X1 (Bp v1)	23.69	22.95	28.15	151.93	127.87	55.63	2.15		2.32
		evgTRINITY_DN87388_c2_g1_i1	multidrug resistance-associated protein 1-like (Bp v5)	2.43	2.84	1.66	12.17	3.41	17.71	2.08
		evgTRINITY_GG_16068_c11_g1_i1	multidrug resistance-associated protein 1-like isoform X2	0	14.93	25.69	49.1	37.51	47.38	1.69	1.79
		evgTRINITY_DN91832_c11_g1_i3	multidrug resistance-associated protein 4-like	221.7	191.89	182.33	124.36	98.88	112.81	-0.82	-0.75	-1.03
		evgTRINITY_BU_DN81217_c7_g4_i1	multidrug resistance protein 1-like (Bp v2)	145.73	321.6	335.2	45.49	83.76	48.83		-2.52
		evgTRINITY_DN87672_c0_g1_i1	multidrug resistance protein 1-like (Bp v1)	362.61	369.77	493.96	214.55	1411.66	199.35			1.76
		evgTRINITY_DN92479_c6_g3_i3	multidrug resistance-associated protein 1-like (Bp v3)	65.34	89.78	99.52	98.1	1340.21	86.93			3.95
		evgTRINITY_DN92479_c6_g3_i1	multidrug resistance-associated protein 1-like (Bp v3)	21.51	17.6	31.43	32.27	120.89	28.98			2.33
		evgTRINITY_DN1870_c0_g1_i1	multidrug resistance-associated protein 1-like (Bp v2)	439.54	269.51	449.21	326.44	1817.43	265.8			2.2
		evgTRINITY_DN92297_c3_g1_i1	multidrug resistance-associated protein 5-like	80.78	33.42	77.08	54.41	209.7	111.26			1.66
		evgTRINITY_DN93096_c1_g1_i1	multidrug resistance-associated protein 1-like isoform X1 (Bp v2)	313.23	179.27	311.28	253.64	714.24	312.16			1.37
		evgTRINITY_DN72262_c0_g1_i1	multiple epidermal growth factor-like domains protein 11 (Bp v3)	3.64	0.71	1.66	17.45	1.7	18.54	2.42
		evgTRINITY_BU_DN81026_c1_g1_i4	multiple epidermal growth factor-like domains protein 10 (Bp v1)	27.34	41.59	34.3	15.99	10.67	19.67	-1.13
		evgTRINITY_DN90923_c9_g2_i1	multiple epidermal growth factor-like domains protein 10 (Bp v3)	162.34	124.08	158.45	52.65	47.87	57.9	-1.48	-1.43	-1.64
		evgTRINITY_DN89914_c27_g1_i1	multiple epidermal growth factor-like domains protein 11 (Bp v2)	69.39	52.64	52.63	8.2	7.91	12.18	-2.57	-2.46	-2.75
		evgTRINITY_DN89944_c0_g1_i1	multiple epidermal growth factor-like domains protein 11 (Bp v1)	9.72	6.05	1.9	3.08	65.62	9.27			3.39
		evgTRINITY_DN89944_c3_g1_i1	multiple epidermal growth factor-like domains protein 10 (Bp v2)	9.72	14.22	14.09	6.16	88.65	6.18			2.76
		evgTRINITY_DN88974_c7_g1_i1	multiple epidermal growth factor-like domains protein 10 (Bp v4)	6.68	0.71	4.97	7.19	23.87	0			2.44
		evgTRINITY_DN62954_c0_g2_i1	piwi-like protein 1	242.96	241.06	291.74	189.91	286.42	157.62		-0.58
		evgTRINITY_DN91410_c3_g1_i2	sialate O-acetylesterase-like (Bp v3)	0	0	0	7.19	833.32	3.09	9.38
		evgTRINITY_GG_7218_c0_g1_i1	sialate O-acetylesterase-like (Bp v3)	1.21	0	0	0	308.67	3.09	6.98
		evgTRINITY_GG_3499_c0_g1_i1	sialate O-acetylesterase-like (Bp v4)	0	0	0	2.05	115.59	0	6.55
		evgTRINITY_DN91410_c0_g2_i1	sialate O-acetylesterase-like (Bp v3)	1.21	0	0	1.03	188.2	0	6.26
		evgTRINITY_GG_454Uninf_3886_c0_g2_i1	sialate O-acetylesterase-like (Bp v2)	135.47	88.45	125.61	238.83	231.24	218.68	0.98	0.96
		evgTRINITY_BU_DN80701_c8_g1_i1	sialate O-acetylesterase-like (Bp v1)	1.82	0	0.83	1.03	208.92	0			7.38
		evgTRINITY_DN92732_c4_g1_i1	TNF receptor-associated factor 4-like isoform X1	34.62	21.15	12.37	181.14	37.8	122.19	2.3	2.7
		evgTRINITY_DN50119_c0_g1_i1	tumor necrosis factor receptor superfamily member 10C-like	92.93	79.64	110.23	63.64	59.67	32.45	-0.86
		evgTRINITY_DN61848_c1_g1_i1	zinc carboxypeptidase A 1-like	38.87	26.23	17.4	440.38	22369.6	237.98		3.57	9.62
	Metal binding and transport	evgTRINITY_DN93642_c0_g1_i1	CDK5RAP1-like protein	399.05	448.05	548.66	718.57	509.77	649.04		0.54
		evgTRINITY_DN89957_c15_g1_i1	copper-transporting ATPase 1-like isoform X4	59.81	43.55	50.71	55.28	106.28	54.94			1.02
		evglcl|G0WVJSS01CP1EJ	cysteine-rich motor neuron 1 protein-like	3.09	0.74	0	231.09	0	203.91	6.42	7.03
		evgTRINITY_DN97294_c0_g1_i1	cysteine-rich motor neuron 1 protein-like	2.81	1.1	0	187.95	0	166.25	6.1	6.71
		evgTRINITY_GG_454Uninf_8644_c1_g2_i1	cysteine-rich motor neuron 1 protein-like	2.67	0.78	0	65.53	0	64.15	4.8	5.41
		evglcl|G0WVJSS01DG1PS	cysteine-rich motor neuron 1 protein-like	5.86	2.84	0	69.92	0	57.92	3.69	4.29
		evgTRINITY_DN30189_c0_g1_i1	cytochrome P450 3A6-like	0	0.71	0	4.11	257.44	1.55	7.06
		evgTRINITY_GG_8048_c11_g1_i1	cytochrome P450 3A19-like	0	1.42	0.83	5.13	39.21	9.27	3.96		5.17
		evgTRINITY_DN41690_c0_g2_i1	cytochrome P450 2J1-like	10.93	4.98	1.66	36.96	11.93	49.45	2.4	2.8
		evgTRINITY_DN91369_c15_g1_i1	cytochrome P450 3A19-like	40.7	23.47	23.21	87.26	218.23	106.63	2.22	1.71	2.86
		evgTRINITY_DN83960_c0_g1_i1	cytochrome P450 1A1-like	27.94	29.16	18.23	63.64	83.54	86.54	1.62	1.56
		evgTRINITY_DN65072_c0_g1_i1	cytochrome P450 3A19-like	61.35	32.71	28.18	92.39	117.64	75.72	1.22
		evgTRINITY_DN91008_c16_g1_i1	cytochrome P450 4F22-like	492.59	791.46	902.56	1356.05	1089.43	1437.17	0.83	0.92
		evgTRINITY_DN83610_c3_g1_i1	cytochrome P450 3A7-like	198.5	243.82	154.23	318.19	369.96	299.8	0.73	0.62
		evgTRINITY_DN93348_c10_g1_i1	cytochrome P450 2J1-like	37.14	62.73	42.94	84.29	79.19	69.74	0.7
		evgTRINITY_GG_4658_c0_g1_i1	cytochrome P450 2J3-like	327.99	299.27	416.48	519.43	565.76	596.97	0.69	0.67
		evgTRINITY_GG_23376_c0_g1_i1	cytochrome P450 3A24-like	23.12	18.65	13.72	48.39	210.11	34.01		1.13	3.46
		evgTRINITY_DN92655_c17_g1_i1	cytochrome P450 2E1-like	898.19	1029.41	911.81	599.81	196.49	617.15	-1.01	-0.65	-2.29
		evgTRINITY_GG_5633_c1_g1_i1	cytochrome P450 1A1-like	1072.65	458.66	1306.18	14.37	153.44	37.09	-3.78	-5.22
		evgTRINITY_GG_5182_c0_g1_i1	cytochrome P450 3A7-like	139.25	101.4	119.82	76.35	513.06	70.17			2.06
		evgTRINITY_DN92887_c11_g1_i1utrorf	cytochrome P450 3A24-like isoform X1	188.13	194.13	214.66	79.86	205.87	101.99		-1.14
		evgTRINITY_DN57708_c0_g2_i1	cytochrome P450 3A11-like (Bp v2)	4.25	0.71	1.66	2.05	564.32	0			7.76
		evgTRINITY_DN73478_c0_g1_i1	cytochrome P450 3A11-like (Bp v1)	3.04	7.82	4.97	0	147.76	13.91			4.7
		evgTRINITY_BU_DN81847_c2_g1_i4	cytochrome P450 3A24-like	16.79	8.58	13.48	45.56	205.88	42.05			3.93
		evgTRINITY_DN92624_c2_g1_i1	cytochrome P450 3A7-like	25.96	23.05	37.65	16.03	293.36	42.64			3.3
		evgTRINITY_DN91779_c7_g2_i1	cytochrome P450 4F22-like	40.7	26.31	54.7	28.74	398.95	34			3.26
		evgTRINITY_GG_21741_c0_g2_i1	cytochrome P450 3A19-like	67.32	63.27	48.93	76.21	278.56	60.96			2.19
		evgTRINITY_DN91375_c1_g1_i1	cytochrome P450 3A43-like isoform X1	25.51	47.64	24.04	17.45	150.03	26.27			2.17
		evgTRINITY_GG_23312_c1_g1_i1	cytochrome P450 3A41-like	109.82	128.18	113.4	179.29	514.88	138.42			2.11
		evgTRINITY_BU_DN81631_c8_g1_i1	cytochrome P450 3A41-like	54.11	53.2	80.27	63.41	259.42	74.76			2.02
		evgTRINITY_DN92350_c7_g1_i2	cytochrome P450 3A24-like	92.96	103.95	81.86	89.39	337.79	110.92			1.83
		evgTRINITY_DN84315_c0_g1_i1	cytochrome P450 3A24-like	209.01	309.05	196.77	340.84	852.74	236.22			1.8
		evgTRINITY_DN92350_c7_g1_i3	cytochrome P450 3A24-like	42.63	45.71	53.38	24.14	160.58	43.58			1.74
		evgTRINITY_DN91669_c19_g1_i1	cytochrome P450 4F22-like	120.87	112.35	146.7	100.6	429.64	117.45			1.73
		evgTRINITY_DN91183_c9_g1_i1	cytochrome P450 4F6-like isoform X2	86.77	61.15	103.6	80.07	282.93	76.6			1.72
		evgTRINITY_DN92011_c14_g1_i1	cytochrome p450	169.46	208.2	265.21	296.67	667.61	545.51			1.6
		evgTRINITY_GG_27660_c0_g1_i1	cytochrome P450 3A24-like	338.61	341.88	318.94	409.98	752.97	349.05			1.15
		evgTRINITY_DN91993_c3_g3_i1	cytochrome P450 3A56-like	118.44	86.75	97.8	174.51	214.82	109.72			1.06
		evgTRINITY_GG_10034_c0_g1_i1	cytochrome P450 2U1-like (Bp v1)	21.87	36.98	26.53	87.61	110.82	174.79	2.11	2.16	1.93
		evgTRINITY_GG_10034_c4_g2_i1	cytochrome P450 2U1-like (Bp v1)	3.81	7.91	9.71	26.68	13.49	54.78	2.08	2.42
		evglcl|G0WVJSS02F6A5R	cytochrome P450 2U1-like (Bp v2)	2.28	2.29	6.46	15.98	7.55	25.71	2.04	2.39
		evglcl|G0WVJSS02G9KOU	cytochrome P450 2U1-like (Bp v1)	2.88	8.46	5.22	16.43	20.61	31.76	1.97	2.04
		evgTRINITY_DN90224_c3_g2_i1	cytochrome P450 2U1-like (Bp v3)	295.19	366.2	485.67	158.09	206.29	177.71		-1.2
		evgTRINITY_GG_454Inf_483_c0_g1_i1	DBH-like monooxygenase protein 1	5.62	9.92	0	391.93	628.8	259.59	6.25	5.86	6.8
		evgTRINITY_DN93675_c0_g1_i1	DBH-like monooxygenase protein 1	8.95	10.7	37.3	82.33	3761.32	132.93		2.45	7.58
		evgTRINITY_DN73816_c0_g1_i1	DBH-like monooxygenase protein 1 isoform X2	85.03	76.8	51.39	8.21	54.22	7.73	-1.59	-3.08
		evgTRINITY_DN90222_c9_g1_i1	DBH-like monooxygenase protein 1 homolog	89.29	24.18	75.42	78.02	700.72	72.63			3.43
		evgTRINITY_DN91512_c3_g1_i1	myoglobin-like	264.21	270.22	331.52	457.83	659.8	411.06	0.82	0.58	1.16
		evgTRINITY_DN91432_c5_g2_i1	myoglobin-like isoform X1	23.14	10.94	40.8	21.81	553.5	69.56			4.42
	Oxidative/antioxidative response	evgTRINITY_DN102349_c0_g1_i1	peroxidase-like	335.98	88.8	2.3	3627.14	3.87	3172.58	3.99	4.56
		evgTRINITY_DN69852_c1_g1_i1	chorion peroxidase-like	165.82	76.8	19.89	1118.92	0	1472.71		3.86
		evgTRINITY_DN64919_c2_g1_i1	superoxide dismutase [Cu-Zn]-like (Bp v1)	7818.01	2027.68	55.53	79916.6	49.27	86706.8	4.07	4.64
		evglcl|G0WVJSS02FNI16	superoxide dismutase [Cu-Zn]-like (Bp v1)	2.19	2.26	0	32.49	0	35.96	3.61	4.22
		evglcl|G0WVJSS02F7GG3	superoxide dismutase [Cu-Zn]-like (Bp v2)	35.98	14.66	12.32	118.58	2.18	137.63		2.57
		evgTRINITY_DN104985_c0_g1_i1	superoxide dismutase [Cu-Zn]-like (Bp v2)	963.52	574.16	243.65	2832.38	105.23	2907.08		2.26
		evglcl|G0WVJSS01C904J	superoxide dismutase [Cu-Zn]-like (Bp v2)	12.31	10.63	7.58	37.28	0	60.84		2.21
		evgTRINITY_DN81523_c2_g1_i1	NADP-dependent malic enzyme-like	1539.18	1154.33	1202.58	794.43	678.55	835.58	-0.75
		evglcl|HJ4YRIA01CCZK6	NADH dehydrogenase subunit 4	32.79	52.2	22.38	111.05	55.22	96.95	1.28	1.52
		evglcl|HJ4YRIA01ATNFR	NADH dehydrogenase	207.97	658.09	264.82	1245.21	431.68	1007.64		1.56
		evglcl|HJ4YRIA02IE0C4	NADH dehydrogenase subunit 5	1737.45	4097.26	2204.46	6901.1	3972.37	6093.7		1.26
		evglcl|HJ4YRIA01CXZCF	NADH dehydrogenase subunit 5	139.09	181.22	68.79	285.38	175.61	315.25		1.19
		evglcl|HJ4YRIA02HD4VW	NADH dehydrogenase subunit 4	130.88	249.03	100.18	355.34	191.46	369.66		1.16
		evgTRINITY_GG_454Inf_702_c0_g2_i1	NADH dehydrogenase	174.59	182.59	103.83	292	155.54	386.41		1.13
		evglcl|HJ4YRIA02GWL6K	NADH dehydrogenase subunit 5	465.24	739.71	434.35	1132.52	605.6	1142.19		1.04
		evgTRINITY_DN103351_c0_g1_i1	monomeric sarcosine oxidase-like	69.24	2.84	22.38	283.32	151.74	261.16	2.87	3.08
		evgTRINITY_DN78281_c1_g1_i1	peroxisomal sarcosine oxidase-like	23.08	24.89	36.47	54.41	83.54	61.81	1.23		1.54
		evgTRINITY_DN93655_c0_g1_i1	peroxisomal sarcosine oxidase-like	436.1	436.62	358.04	963.91	746.75	1111.1	1.2	1.33	0.83
		evgTRINITY_BU_DN81243_c14_g1_i1utrorf	spermine oxidase-like	21.87	15.64	17.4	63.64	161.97	146.81	2.73	2.45	3.1
		evgTRINITY_DN94618_c0_g1_i1	superoxide dismutase [Cu-Zn], chloroplastic-like	37.66	17.78	2.49	483.5	5.11	488.33	4.05	4.62
		evgTRINITY_GG_18179_c0_g1_i1	laccase-2-like	6.68127	0.711102	4.14397	11.2918	23.8686	9.27204			2.53586
		evgTRINITY_DN92232_c3_g1_i1	laccase-15-like	102.649	106.665	164.93	273.057	124.458	290.524		1.1593
		evgTRINITY_DN46555_c0_g1_i1	laccase-2-like	41.3024	118.754	108.572	228.917	59.6716	217.893		1.30018
		evgTRINITY_GG_25171_c1_g1_i1	laccase-2-like	352.492	548.978	472.189	812.633	579.429	1082.8		1.03325
		evgTRINITY_DN12476_c0_g1_i1	tyrosinase-1	89.3772	42.6661	8.67747	3474.86	10.2124	2598.27	5.42133	5.98644
		evgTRINITY_DN25074_c0_g1_i1	tyrosinase-1	275.147	31.9996	0	4480.67	0	4313.23		5.40471
		evgTRINITY_DN744_c0_g1_i1	thioredoxin domain-containing protein 12-like isoform X2	13.24	6.29	1.57	117	27.99	54.47	3.17	3.5
		evglcl|G0WVJSS02IGHAU	thioredoxin domain-containing protein 17-like	39.48	29.87	25.69	74.94	138.1	74.18	1.58		2.09
		evgTRINITY_DN85454_c4_g1_i2	thioredoxin domain-containing protein 3 homolog isoform X2	138.79	184.79	129.25	77.99	69.47	95.01	-0.9	-0.81
		evgTRINITY_DN88054_c2_g1_i1	thioredoxin-like protein AAED1 isoform X2	109.63	96	125.98	58.51	39.21	61.81	-1.05	-0.88	-1.5
	Pattern recognition, carbohydrate binding, adhesion	evgTRINITY_BU_DN80945_c7_g2_i1	DEC-1	105.08	49.78	85.37	162.19	112.52	143.72		0.91
		evglcl|G0WVJSS02HEBDX	annexin A7-like	9.15	0	9.87	21.63	18.55	55.14	2.25
		evglcl|G0WVJSS02G61SU	annexin A7-like	200.32	226.93	132.68	517.52	428.72	326.3	1.18	1.16
		evglcl|G0WVJSS02I6DTZ	annexin A7-like	11.46	0	2.1	40.32	71.76	0.59			3.85
		evgTRINITY_DN84866_c0_g1_i1	beta-1,3-glucan-binding protein-like isoform X1	0	0	0	1.03	400.65	7.73	8.34
		evgTRINITY_GG_19826_c0_g1_i1	beta-1,3-glucan-binding protein-like	0	1.42	0	2.05	772.97	6.18	8.18
		evglcl|G0WVJSS02GRNA4	beta-1,3-glucan-binding protein-like precursor	0.62	2.29	0	305.91	0	255.37	7.07	7.7
		evgTRINITY_DN65632_c0_g1_i1	beta-1,3-glucan-binding protein-like precursor	224.72	27.58	0	5941.1	1.7	4902.98		5.99
		evgTRINITY_DN104938_c0_g1_i1	beta-1,3-glucan-binding protein-like isoform X3	3.04	25.6	0.96	4.81	7964.29	7.99			9.58
		evglcl|G0WVJSS01DP1SI	beta-glucan recognition protein	12.6	0.71	4.47	11.37	45.38	19.95			2.8
		evgTRINITY_DN91889_c3_g1_i1	C-type lectin domain family 6 member A-like	15.18	6.4	9.12	92.39	3.41	41.72		2.63
		evgTRINITY_DN21606_c0_g1_i1	complement C1q-like protein 3	0	3.56	0	1.03	363.14	0	6.24
		evgTRINITY_GG_443_c0_g2_i1	complement C1q-like protein 4	0	17.78	3.32	3932.72	5.11	4723.23	8.6	9.18
		evglcl|G0WVJSS01DS0AY	complement C1q-like protein 4	0	0	0	4.11	406.5	3.11	8.36
		evgTRINITY_DN90418_c1_g1_i2	chitinase-3-like protein 1	1.82	0	0.83	53.38	0	81.9	5.12	5.73
		evgTRINITY_DN89595_c2_g1_i2	fibrillin-1-like	3.04	0	3.32	3.08	415.2	4.64			7.37
		evgTRINITY_GG_19299_c35_g1_i2	fibropellin-1-like	116.62	39.82	39.78	139.61	993.24	242.62			3.88
		evgTRINITY_DN91238_c8_g2_i1	fibrinogen related protein 13.1-as1 precursor	20.8	35.56	53.32	115.31	28.97	78.49		1.38
		evgTRINITY_DN102510_c0_g1_i1	fibrinogen-like protein A	0	7.82	1.66	4.11	4366.26	12.36			10.26
		evgTRINITY_GG_454Uninf_8510_c0_g10_i1	fibrinogen related protein 12.1 precursor	130.59	90.62	83.29	45.35	25.76	35.13	-1.51	-1.34
		evgTRINITY_GG_21946_c0_g1_i1	fibrinogen related protein 13.1-as2 precursor	6.48	12.08	12.15	23.28	39.13	28.94	1.53
		evgTRINITY_GG_26361_c8_g2_i1	fibrinogen related protein 13.1-as2 precursor	4.43	15.57	28.87	39.07	43.92	35.02	1.25
		evgTRINITY_BU_DN82396_c9_g3_i1	fibrinogen-related protein 2.25	0	67.31	14.34	147.69	0	92.94		2.1
		evglcl|G0WVJSS02JSGF1	fibrinogen-related protein 2	0.13	3.56	13.86	25.46	0	26.19		2.06
		evgTRINITY_GG_25704_c1_g1_i1	fibrinogen-related protein 2	2.82	45.13	25.66	102.79	5.44	64.78		1.73
		evglcl|G0WVJSS02F7J1A	FREP 5	6.6	13.2	4.69	36	0	23.47		1.82
		evgTRINITY_BU_DN82297_c10_g1_i1	fibrinogen-related protein 7-1 precursor	9.14	41.5	25.28	95.58	75.95	82.47	1.73	1.79
		evgTRINITY_BU_DN82396_c7_g2_i1	FREP 7	24.73	54.31	65.55	101.3	173.25	113.43	1.42	1.14	1.79
		evglcl|G0WVJSS01DT4R5	FREP 7	9.88	31.63	13.61	39.03	41.41	41.85	1.13
		evgTRINITY_GG_27635_c0_g1_i1	fibrinogen-related protein 7-1 precursor	21.23	25.59	36.68	52.51	110.32	47.84			1.95
		evgTRINITY_GG_16092_c0_g1_i1	fibrinogen-related protein 7-1 precursor	8.53	26.89	25.14	33.84	76.02	43.73			1.85
		evgTRINITY_DN92590_c9_g1_i1	hemocytin-like	33.98	17.78	21.55	2702.34	22302.2	2522.92	8.53	6.75	9.78
		evgTRINITY_DN103478_c0_g1_i1	macrophage mannose receptor 1-like isoform X1	0.61	2.13	0	58.51	0	207.08	6.06	6.59
		evgTRINITY_DN86000_c0_g1_i1	macrophage mannose receptor 1-like, partial	49.22	16.85	18.23	31.82	8527.14	29.36			8.2
		evgTRINITY_DN92418_c3_g2_i1	macrophage mannose receptor 1-like	66.04	76.74	45.14	38.38	338.73	56.48			2.4
		evgTRINITY_DN77996_c0_g1_i1	mucin-5AC-like (Bp v1)	6.68	9.96	13.26	76.99	8.52	180.8		3.59
		evglcl|G0WVJSS01BK20D	mucin-2-like	25.51	14.93	7.46	72.88	165.38	126.72	2.9	2.59	3.31
		evgTRINITY_DN89211_c1_g1_i1	mucin-2-like	1.82	0	0.83	9.06	10.76	1.55	2.53
		evgTRINITY_DN90607_c3_g1_i2	mucin-3A-like	106.97	3.03	113.1	226.61	141.15	312.11	1.6	1.82
		evgTRINITY_DN90766_c9_g2_i1	mucin-like protein (Bp v1)	63.17	56.18	70.45	136.14	109.98	139.61	1.02	1.11
		evglcl|HJ4YRIA01BSTYI	mucin-5AC-like (Bp v2)	175.09	35.17	37.17	481.63	43.1	866.3		2.98
		evgTRINITY_GG_454Inf_787_c1_g6_i7	mucin-5AC-like, partial	2685.14	733.01	990.22	8490.34	1384.6	14385.6		2.93
		evgTRINITY_DN46513_c1_g1_i1	mucin-17-like	64.38	126.58	67.13	357.23	73.31	415.7		2.15
		evgTRINITY_DN90607_c3_g1_i1	mucin-3A-like	27.63	3.37	22.8	67.63	24.62	92.64		2.12
		evgTRINITY_DN90607_c3_g2_i1	mucin-3A-like	278.79	76.32	223.77	605.63	240.39	619.68		1.64
		evgTRINITY_GG_17277_c3_g1_i1	mucin-5AC-like (Bp v3)	230.81	173.51	190.62	79.04	73.31	100.45	-1.23	-1.15
		evgTRINITY_GG_16393_c4_g1_i1	mucin-22-like isoform X1	66.79	100.27	68.25	12.32	23.87	35.54	-1.7	-1.71
		evgTRINITY_GG_15220_c1_g1_i1	mucin-like protein (Bp v2)	757.67	516.17	373.49	28.88	219.81	33.12	-2.54	-4.16
		evgTRINITY_BU_DN79585_c0_g1_i1	mucin-22-like (Bp v1)	16.4	0.71	40.61	13.34	129.57	23.18			2.64
		evgTRINITY_GG_23438_c7_g1_i1	mucin-22-like (Bp v2)	18.82	9.24	21.02	14.37	50.82	24.15			1.6
		evgTRINITY_DN97218_c0_g1_i1	peptidoglycan-recognition protein SC2-like (Bp v2)	0	2.84	0	3.08	973.81	0.77	7.9
		evglcl|G0WVJSS02H753R	peptidoglycan-recognition protein SC2-like (Bp v5)	2.38	2.51	3.24	20.82	131.53	18.9	4.2		5.41
		evgTRINITY_DN70758_c1_g1_i1	peptidoglycan-recognition protein SC2-like (Bp v5)	20.65	31.62	45.54	168.99	2120.59	178.86		2.39	5.98
		evgTRINITY_DN43439_c0_g1_i1	peptidoglycan-recognition protein SC2-like (Bp v3)	1.82	2.84	0.83	1.03	746.75	7.73			8.39
		evgTRINITY_GG_454Uninf_232_c6_g1_i1	peptidoglycan-recognition protein SC2-like (Bp v1)	1.63	5.24	1.14	9.36	228.17	8.65			6.22
		evglcl|G0WVJSS02H2QBM	peptidoglycan-recognition protein SC2-like (Bp v4)	3.34	12.54	9.32	10.69	616.73	12.35			6.12
		evgTRINITY_DN97307_c0_g1_i1	peptidoglycan-recognition protein SC2-like (Bp v3)	126.94	330.66	164.66	259.71	1486.66	299.8			2.79
		evgTRINITY_DN58911_c0_g1_i1	peptidoglycan-recognition protein SB1-like	18.22	24.18	20.72	22.58	131.57	24.73			2.61
		evgTRINITY_GG_12053_c2_g1_i1	galectin-4-like	123.3	118.63	175.56	158.34	322.57	168.78			1.18
		evgTRINITY_DN93107_c7_g1_i1	leucine-rich repeat-containing protein 15-like	18.83	0	3.32	45.17	368.26	18.54	4.21		5.54
		evgTRINITY_GG_454Uninf_9282_c1_g1_i1	toll-like receptor 8 or 4	25.92	24.98	14.89	7.95	7.31	7.36	-1.49
		evgTRINITY_DN92194_c2_g3_i1	leucine-rich repeat-containing G-protein coupled receptor 5-like,	68.94	47.22	52.14	22.82	8.87	4.34	-2.18	-2.01	-2.56
		evgTRINITY_DN82625_c0_g1_i1	toll-like receptor 13	1.21	3.56	4.14	7.19	52.85	0			4
	Stress response, detoxification, chaperones	evglcl|HJ4YRIA02JQMCN	Alpha-crystallin B chain-like	421.44	728.68	293.03	52.83	61.92	34.85	-3.26	-3.48
		evgTRINITY_DN88119_c2_g1_i1	Alpha-crystallin B chain-like	3381.26	4475.03	1500.88	196.45	361.76	160.62	-3.7	-4.17
		evgTRINITY_DN89032_c5_g1_i1	putative amine oxidase [copper-containing] (Bp v1)	20.65	3.56	23.21	42.09	32.39	46.36	1.33	1.45
		evgTRINITY_DN64857_c1_g1_i1	putative amine oxidase [copper-containing] (Bp v3)	1441.93	1447.8	1292.09	413.69	402.36	386.75	-1.8	-1.81	-1.82
		evgTRINITY_DN48638_c0_g1_i1	putative amine oxidase [copper-containing] (Bp v2)	0.61	2.13	0	3.08	782.55	4.64			9.25
		evgTRINITY_DN29414_c0_g1_i1	putative amine oxidase [copper-containing] (Bp v2)	53.45	56.89	73.76	103.68	1507.13	114.36			4.58
		evgTRINITY_DN75731_c0_g2_i1	amine oxidase [flavin-containing] B-like isoform X1	4.25	3.56	7.34	14.37	100.74	10.18			4.21
		evgTRINITY_DN46072_c1_g1_i1	putative amine oxidase [copper-containing] (Bp v3)	159.14	147.91	174.05	180.67	88.65	112.81			-0.87
		evglcl|HJ4YRIA01DFNFT	glutathione S-transferase-like	26.69	60.21	31.34	394.43	195.83	142.06	2.62	2.7	2.26
		evglcl|G0WVJSS02JS4RK	glutathione S-transferase Mu 1-like	2.46	0	3.34	16.92	13.04	6.55	2.42	2.37
		evgTRINITY_DN99899_c0_g1_i1	probable glutathione S-transferase 7 (Bp v2)	139.1	265.7	246.88	808.95	783.44	1079.37	2.03	2.1	1.81
		evgTRINITY_DN91941_c15_g1_i4	glutathione S-transferase omega-1-like	180.56	151.64	173.93	554.29	930.14	319.11	1.83	1.35	2.43
		evglcl|G0WVJSS01A5WRN	probable glutathione S-transferase 7 (Bp v3)	1.36	8.51	12.96	25	26.56	27.34	1.73	1.73
		evgTRINITY_DN105214_c0_g1_i1	probable glutathione S-transferase 7 (Bp v1)	1052.59	1404.33	1187.66	2074.62	2223.19	1815.3	0.75	0.67	0.84
		evgTRINITY_DN102262_c0_g1_i1	glutathione S-transferase kappa 1-like	231.41	280.17	281.79	433.2	393.83	443.51	0.68	0.72
		evglcl|G0WVJSS01ERVHV	probable glutathione S-transferase 7 (Bp v3)	2.6	11.8	5.88	25.07	25.03	32.42		2.03
		evgTRINITY_DN78523_c0_g1_i1	glutathione S-transferase 4-like	6.07	36.98	7.46	10.27	182.42	13.91			3.36
		evgTRINITY_DN92288_c24_g1_i1	glutathione S-transferase C-terminal domain-containing protein-like	58.63	79.5	63.47	99.6	150.51	54.64			1.14
		evgTRINITY_DN92724_c4_g1_i1	heat shock cognate 70 kDa protein	0	0	0	0	258.4	1.55	7.69
		evgTRINITY_DN74389_c0_g1_i1	Hsp70	0.61	0.71	0	114.97	250.62	13.91	7.2	6.15	8.29
		evgTRINITY_GG_25613_c6_g1_i1	heat shock protein 70 A1-like	256.32	458.66	319.09	641.58	407.47	791.21		1.04
		evgTRINITY_DN89236_c3_g2_i1	HSP70-like protein	31.79	63.32	112.62	3.08	1.7	0	-5.11	-5.11
		evgTRINITY_DN85267_c1_g1_i1	heat shock 70 kDa protein cognate 3	0	0.71	174	0	0	0	-7.12	-6.99
		evgTRINITY_DN89236_c3_g1_i1	HSP70-like protein	42.31	71.07	165.85	2.05	0	0		-5.96
		evgTRINITY_BU_DN73110_c0_g1_i1	heat shock protein Hsp70	26.12	219.02	0	0	0	1.55		-6.18
		evgTRINITY_DN90270_c15_g1_i1	major vault protein-like	2885.6	2399.97	2905.75	3669.85	5404.44	3327.12			0.95
		evgTRINITY_DN31703_c0_g1_i1	microsomal glutathione S-transferase 1-like	200.8	183.61	168.83	278.09	313.86	280.74			0.74
		evglcl|G0WVJSS01EAWII	soma ferritin-like (Bp v2)	0	1.86	7.56	36.06	169.09	69.37	4.69	3.88	5.58
		evglcl|G0WVJSS01B6W10	soma ferritin (Bp v2)	9.21	0	8.63	37.95	23.12	28.59	2.25	2.4
		evglcl|HJ4YRIA02GP3FD	soma ferritin (Bp v2)	5295.08	5697.48	4263.06	3338.69	2734.41	1399.6	-1.03
		evglcl|HJ4YRIA01CJRD3	soma ferritin (Bp v2)	42.43	42.99	39.48	4.2	28.2	0	-1.91	-3.99
		evglcl|HJ4YRIA02H5KOX	soma ferritin (Bp v2)	16.86	26.08	18.02	8.89	0	3.91	-2.15
		evglcl|HJ4YRIA01CV16S	soma ferritin (Bp v2)	65.43	47.76	24.65	0	0	6.26		-3.69
		evglcl|HJ4YRIA02JS5J3	Soma ferritin (Bp v1)	150.95	38.58	152.62	596.62	703.15	0			2.56
		evgTRINITY_GG_454Inf_1204_c0_g2_i1	soma ferritin-like (Bp v2)	480.21	943.43	780.81	1112.76	2456.71	576.64			1.69
		evglcl|G0WVJSS01DZYOO	soma ferritin (Bp v2)	7287.86	8220.33	7715.96	6562.24	5115.29	7559.58			-0.63
		evglcl|G0WVJSS01A2A08	soma ferritin-like (Bp v1)	718.12	890.86	797.46	873.33	408.44	924.25			-1
		evglcl|G0WVJSS02HAF0I	soma ferritin-like (Bp v1)	253.24	306.56	258.89	289.93	128.7	320.23			-1.11
CELL AND TISSUE STRUCTURE, SHAPE, MOBILITY	Cytoskeleton, biomineralization, tissue growth	evgTRINITY_GG_18621_c11_g1_i1	actin	507.528	493.071	399.735	1035.18	567.699	1071.93	0.933383	1.16199
		evgTRINITY_DN90715_c12_g1_i1	actin, adductor muscle-like	83.1393	179.909	64.6459	315.145	10829.5	293.615		1.46733	6.61642
		evgTRINITY_DN89615_c6_g1_i1	actin-2/beta-actin	34.0137	57.5992	132.607	2.05306	0	0		-5.64284
		evglcl|G0WVJSS02HK7AS	actin-related protein 2/3 complex subunit 3-like	68.2765	85.062	60.6594	93.5992	168.052	59.6038			1.29538
		evgTRINITY_DN41575_c0_g1_i1	actin-binding protein anillin-like	279.399	260.263	203.054	149.874	242.096	159.17		-0.694742
		evgTRINITY_DN87864_c5_g1_i1	actin-interacting protein 1-like	1356.3	1510.38	1239.88	1312.93	2112.38	1257.91			0.59583
		evgTRINITY_DN74222_c0_g1_i1	collagen alpha-6(VI) chain-like (Bp v2)	15.4823	2.84441	0	791.312	0	633.59	6.18564	6.76362
		evgTRINITY_DN95353_c0_g1_i1	collagen alpha-3(VI) chain-like	3.03694	10.6665	4.97276	225.837	485.898	10.8174	5.18165	3.98254	6.18639
		evgTRINITY_BU_DN80783_c2_g2_i1	collagen alpha-3(VI) chain-like isoform X3	2.6968	0	5.80156	25.4272	0	34.0748	2.63758	3.22269
		evgTRINITY_DN91628_c11_g2_i2	collagen alpha-5(VI) chain-like (Bp v1)	9.11082	11.8825	3.31517	19.5041	42.6226	52.5416	2.18482
		evgTRINITY_DN59816_c0_g1_i1	collagen alpha-5(VI) chain-like (Bp v2)	239.918	2.84441	164.93	675.458	0	812.849		2.42492
		evgTRINITY_DN17434_c0_g1_i1	collagen alpha-5(VI) chain-like (Bp v3)	1073.63	1433.58	1959.27	3346.11	770.616	5418.52		1.53277
		evgTRINITY_DN18335_c0_g1_i1	collagen alpha-1(XIV) chain-like (Bp v2)	51.713	57.8766	97.7977	209.412	6734.37	177.714		1.46686	6.57257
		evgTRINITY_GG_23420_c0_g1_i1	collagen alpha-1(I) chain-like (Bp v1)	762.394	1031.54	1120.1	201.672	210.999	115.221	-2.46187	-2.62821	-2.25154
		evglcl|G0WVJSS02HSAGQ	collagen alpha-1(I) chain-like (Bp v1)	140.355	202.771	199.242	37.725	36.2122	22.3147	-2.47888	-2.58272	-2.33312
		evgTRINITY_GG_454Uninf_498_c3_g1_i1	collagen alpha-1(I) chain-like (Bp v2)	393.241	0	0	2.39182	0	0		-6.53371
		evgTRINITY_DN71834_c1_g2_i1	collagen alpha-1(XII) chain-like	0.607388	0.711102	0	2.05306	1084.32	1.54534			1.39495
		evgTRINITY_DN72940_c1_g1_i1	collagen alpha-6(VI) chain-like (Bp v1)	17.1709	18.4886	11.6031	27.7164	13881.2	23.041			9.72382
		evglcl|G0WVJSS02JZVY9	collagen alpha-1(XII) chain-like (Bp v2)	0	0.988431	2.10514	4.96841	731.693	1.63806			9.26418
		evgTRINITY_DN105071_c0_g1_i1	collagen alpha-1(XII) chain-like (Bp v2)	25.2066	60.8774	39.3345	80.2337	7378.07	64.8116			7.42676
		evglcl|G0WVJSS01ARP6H	collagen alpha-1(XIV) chain-like (Bp v1)	31.0618	46.2216	46.9346	28.4247	5.62618	55.9413			-2.68874
		evgTRINITY_DN88408_c1_g1_i1	collagen alpha-1(XXI) chain-like	2.42955	0.711102	0	181.542	0	274.252	6.69622	7.39674
		evgTRINITY_GG_454Uninf_549_c1_g4_i1	collagen alpha-1(XII) chain-like (Bp v1)	7.84138	2.73063	0	439.335	0	407.599	6.16278	6.75282
		evgTRINITY_DN91993_c9_g1_i1	collagen alpha-1(XII) chain-like (Bp v1)	323.44	91.4406	0	5566.77	8.52452	4892.6	4.65295	5.22287
		evgTRINITY_DN12479_c0_g1_i1	ectonucleotide pyrophosphatase/phosphodiesterase family member 6-like	306.124	396.795	14.9183	790.429	3.40981	1030.74		1.95115
		evgTRINITY_DN90206_c20_g1_i1	ectonucleotide pyrophosphatase/phosphodiesterase family member 5-like isoform X2	15.9014	0	10.0367	17.8719	190.676	42.4814			4.37814
		evgTRINITY_BU_DN79621_c0_g1_i1	Intermediate filament protein ifa 1	15.8346	30.876	34.6353	3.07959	0	0		-3.73519
		evglcl|G0WVJSS02JAEZU	profilin-4-like isoform X2	0	4.72883	6.27397	14.0327	187.369	15.407			5.52879
		evglcl|G0WVJSS01ERG83	profilin-4-like isoform X2	29.1668	24.4263	31.8505	48.5857	498.446	37.1345			4.86933
		evglcl|HJ4YRIA02IID4O	tubulin alpha-1A chain-like (Bp v1)	7.28866	19.4202	7.12763	34.5531	25.5736	30.4123	1.38697	1.49343
		evglcl|G0WVJSS01BO17J	tubulin alpha-1A chain-like (Bp v1)	6.74808	15.2674	9.14159	33.2288	49.016	21.712	1.69832	1.36955
		evgTRINITY_GG_454Inf_14_c0_g1_i1	tubulin alpha-1A chain-like (Bp v1)	22.7224	40.3764	12.1833	62.7827	100.487	59.1556	1.54759	1.25899	1.93384
		evgTRINITY_DN17349_c0_g1_i1	tubulin beta chain-like	17.6143	8.53322	1.86479	62.6184	10.1271	37.0882		2.34929
		evglcl|G0WVJSS02IBO87	tubulin alpha-1A chain-like (Bp v2)	246.721	176.517	173.74	108.556	83.4721	123.658	-0.916467
		evgTRINITY_GG_25484_c0_g1_i1	tubulin alpha-1A chain-like (Bp v2)	992.946	685.502	769.875	435.424	335.61	418.123	-1.41647	-0.951959
		evgTRINITY_GG_25484_c4_g1_i1	tubulin alpha-3 chain-like	779.571	574.321	596.242	314.201	183.226	360.188	-1.18398	-0.961716	-1.87385
		evgTRINITY_BU_DN80594_c0_g1_i1	tubulin alpha-1A chain-like (Bp v3)	145.366	158.355	127.328	53.8519	28.165	63.4826	-1.55856	-1.29496	-2.33164
		evgTRINITY_DN79465_c0_g1_i1	beta tubulin	1.21478	84.6211	0	0	0	0	-6.13163	-5.96188
		evgTRINITY_DN89282_c14_g1_i1	tubulin beta-4B chain isoform X5	26.7251	33.4218	98.6265	2.58686	0	0		-4.93379
		evgTRINITY_DN89282_c8_g2_i1	tubulin beta chain	70.457	92.4432	284.276	6.65193	0	0		-5.36559
		evgTRINITY_GG_454Uninf_72_c2_g1_i1	tubulin alpha-1A chain-like (Bp v1)	293.976	326.396	373.786	461.939	1808.9	679.95			2.42137
		evglcl|HJ4YRIA02JQE3W	tubulin alpha-1A chain-like (Bp v1)	9.15942	26.8228	13.6088	21.434	70.3102	31.1232			2.24525
		evgTRINITY_DN97267_c0_g1_i1	tubulin polymerization-promoting protein family member 2-like	2604.41	2369.16	2050.12	1948.43	1040.23	1453.98			-1.27533
ENERGY, METABOLISM, AND HYDROLYTIC ENZYMES	ATP biosynthesis	evglcl|G0WVJSS01DTDSW	ATP synthase subunit g, mitochondrial-like	0.741014	2.9013	0	21.5674	2.69375	14.0317	3.143
		evgTRINITY_DN78642_c2_g2_i1	ATP synthase subunit beta, mitochondrial	3.03694	122.31	0	0	0	0	-6.64286
		evglcl|HJ4YRIA01BGX0K	cytochrome b-like	1.28766	6.09414	3.38977	49.1709	29.222	32.7921	3.22357	3.37533
		evglcl|G0WVJSS02GZGXQ	cytochrome b5-like	120.961	129.307	111.879	219.678	288.487	184.127	0.932443	0.732263	1.23648
		evglcl|G0WVJSS01ELR0R	cytochrome b-c1 complex subunit 6, mitochondrial-like	262.112	403.628	207.107	884.788	242.301	784.94		1.57917
		evglcl|G0WVJSS02GAY2A	cytochrome b	126.051	126.356	70.7956	222.911	76.6866	219.377		1.23346
		evglcl|G0WVJSS01EY1WE	cytochrome c oxidase subunit 5A	21.1918	29.2121	39.434	82.8719	89.7802	68.8295	1.41386	1.32664	1.54965
		evglcl|HJ4YRIA02GJ01H	cytochrome c oxidase subunit III	5438.98	8217.76	4204.32	13576.9	7010.72	12785.2		1.13292
		evglcl|HJ4YRIA01DUK57	cytochrome c oxidase subunit I	31.6146	41.3719	26.5628	9.26958	0	9.89018	-2.33193	-1.73656
		evglcl|G0WVJSS01DHDYU	cytochrome c oxidase subunit I	123.846	0	0.828794	1.0368	0	0	-5.77257
		evgTRINITY_DN45158_c0_g2_i1	cytochrome c oxidase subunit XV assembly protein	0	0.711102	283.447	0	0	0	-7.81548	-7.68539
		evgTRINITY_BU_DN74038_c0_g1_i1	phosphoglycerate kinase precursor	21.3983	129.157	6.63035	0	0	3.09068		-4.84654
	Carbohydrate metabolism	evgTRINITY_DN82612_c4_g1_i1	chitotriosidase-1-like (Bp v1)	20.0438	1.4222	4.14397	158.086	6.81961	645.952	4.91726	5.37278
		evgTRINITY_DN102324_c0_g1_i1	chitotriosidase-1-like (Bp v2)	78.3531	4.26661	10.7743	596.415	0	1370.72	4.37818	4.89897
		evgTRINITY_DN78292_c0_g1_i1	acidic mammalian chitinase-like	13.9699	2.13331	0.828794	82.1225	188.733	219.995	4.75763	4.577	4.94841
		evgTRINITY_DN80537_c0_g3_i1	chitinase-like protein PB1E7.04c	95.5847	46.0012	68.6407	2.31996	17.2707	28.8206	-2.89926	-2.16498
		evgTRINITY_BU_DN55137_c0_g1_i1	acidic mammalian chitinase-like	19.4364	4.26661	4.14397	2.05306	896.779	1.54534			6.58696
		evgTRINITY_DN75239_c0_g1_i1	endoglucanase 4-like isoform X1 (Bp v3)	0	17.7775	0	20.1611	54059.6	24.8182	11.4722
		evgTRINITY_DN91542_c0_g1_i2	endoglucanase A-like (Bp v5)	0	0	0.464124	1.5398	4804.88	8.8239	11.4421
		evgTRINITY_DN81575_c0_g1_i1	endoglucanase E-4-like (Bp v1)	0.674201	0	0	2.8127	964.975	1.54534	8.96574
		evgTRINITY_BU_DN81306_c1_g1_i1	endoglucanase A-like (Bp v4)	0	1.4222	0	1.02653	1066.67	1.54534	8.63687
		evgTRINITY_DN82853_c3_g1_i1	endoglucanase-like (Bp v4)	0	4.97771	0	0	2410.75	1.54534	8.5943
		evgTRINITY_DN45529_c0_g1_i1	endoglucanase-like (Bp v2)	271.551	42.5594	2.48638	2679.07	803.981	2814.92	4.38695	4.68217
		evglcl|G0WVJSS02GJB65	endoglucanase-like (Bp v3)	10.4349	1.4222	0	48.7192	17.8674	76.6334	3.4664	3.84153
		evglcl|G0WVJSS02IAGJC	endoglucanase-like (Bp v3)	8.73424	1.4222	0	111.512	0	125.25		4.96929
		evglcl|G0WVJSS01CE6M8	endoglucanase-like (Bp v2)	2.81828	1.0951	0	15.5006	1108.49	26.0699		3.64962	9.35612
		evgTRINITY_DN93670_c0_g1_i1	endoglucanase A-like (Bp v3)	284.865	231.819	180.677	89.5136	3871.53	140.719			4.26776
		evgTRINITY_DN3612_c0_g1_i1	endoglucanase A-like (Bp v2)	0	0.711102	0.828794	2.05306	3314.33	1.54534			11.8811
		evgTRINITY_DN5409_c0_g1_i1	endoglucanase 4-like isoform X1 (Bp v1)	7.89605	4.26661	3.31517	8.21225	9353.03	9.27204			1.69896
		evgTRINITY_DN53270_c0_g1_i1	endoglucanase A-like isoform X1	0.607388	3.55551	0	3.07959	2030.51	4.63602			1.16714
		evgTRINITY_DN16100_c0_g1_i1	endoglucanase E-4-like (Bp v2)	2.42955	6.39992	0.828794	11.2918	2562.47	10.8174			9.46282
		evgTRINITY_DN91542_c0_g1_i3	endoglucanase A-like (Bp v4)	1.26337	6.07281	0	0	1755.08	3.94062			9.27128
		evgTRINITY_DN2425_c0_g1_i1	endoglucanase-like (Bp v1)	4.85911	11.527	2.80961	13.4476	3898.59	30.5977			9.14918
		evgTRINITY_DN82853_c0_g1_i1	endoglucanase-like (Bp v4)	0.607388	1.4222	0.828794	0	638.623	1.54534			8.91283
		evgTRINITY_DN46420_c0_g1_i1	endoglucanase-like (Bp v4)	0	2.84441	0.828794	5.13266	301.291	0			7.56239
		evgTRINITY_DN75239_c2_g1_i1	endoglucanase 4-like isoform X1 (Bp v2)	52.2354	160.709	66.3035	84.1756	6332.01	94.2658			6.58355
		evgTRINITY_DN79759_c0_g1_i1	endoglucanase A-like (Bp v1)	151.264	130.843	31.4942	100.6	1936.77	111.805			4.17258
		evgTRINITY_BU_DN80188_c8_g3_i1	endoglucanase 2-like	238.922	41.955	22.4189	255.873	1261.63	163.157			3.55125
		evgTRINITY_GG_21667_c2_g1_i1	endoglucanase A-like (Bp v6)	61.9536	23.4664	5.80156	83.7958	374.84	52.5416			3.54934
		evgTRINITY_BU_DN81737_c2_g1_i1	maltase-glucoamylase, intestinal-like	158.14	186.97	218.677	290.857	392.367	202.95			1.31619
	Cholesterol homeostasis, lipid metabolism	evgTRINITY_DN40950_c0_g1_i1	long-chain-fatty-acid--CoA ligase 5-like	276.362	250.308	230.023	161.165	1766.28	157.625			2.77878
		evgTRINITY_DN94990_c0_g1_i1	very low-density lipoprotein receptor-like	0	1.4222	0	8.50995	2676.7	0	9.96429
		evgTRINITY_BU_DN81985_c12_g3_i1	prosaposin-like isoform X2	1229.01	1100.79	1671.66	1249.29	3260.73	1098.74			1.24984
	Metabolic	evgTRINITY_GG_1133_c4_g1_i1	aldehyde dehydrogenase	722.124	704.88	867.084	728.714	2156.16	1058.4			1.46572
		evgTRINITY_DN105018_c0_g1_i1	aldehyde dehydrogenase family 3 member B1-like	889.216	1003.88	896.755	858.18	1952.11	933.386			1.42799
	Transport	evglcl|G0WVJSS01ALWK9	ADP,ATP carrier protein-like	4.26387	8.37678	5.51148	234.48	31.5748	111.728	4.28684	4.78276
		evgTRINITY_DN81915_c2_g1_i1	cytoglobin-2-like	58.5097	94.3774	83.0783	182.415	114.229	243.886	1.19145	1.4199
		evgTRINITY_GG_454Uninf_8280_c0_g1_i1	neuroglobin-like	9.08045	6.30747	3.49751	22.7993	74.2486	21.7739			3.47273
		evglcl|G0WVJSS02JS37H	haemoglobin type 1	0.850344	15.4665	6.61377	39.2238	47.0553	50.4245	2.51142	2.48774	2.54962
		evgTRINITY_DN90083_c1_g1_i1	haemoglobin type 1	0	5.68881	14.9183	8.21225	42.6226	112.81			2.49644
		evgTRINITY_DN83909_c2_g1_i1	haemoglobin type 1	354.611	452.73	767.422	490.148	1875.21	1520.77			1.78961
		evgTRINITY_DN91496_c1_g1_i1	proton myo-inositol cotransporter-like (Bp v1)	113.472	135.259	191.543	371.615	658.843	551.069	1.84186	1.62953	2.13383
		evgTRINITY_DN93288_c6_g1_i1	proton myo-inositol cotransporter-like (Bp v2)	251.374	332.796	270.783	638.451	392.128	576.412	0.994459	1.79455
TRANSCRIPTION/TRANSLATION REGULATION, CELL SIGNALING	Apoptosis	evgTRINITY_DN53331_c0_g1_i1	glyceraldehyde-3-phosphate dehydrogenase (Bp v1)	14.5773	31.9996	65.4747	1.02653	3.40981	0	-4.31242	-5.29551
		evgTRINITY_DN82953_c3_g1_i1	glyceraldehyde-3-phosphate dehydrogenase (Bp v2)	45.5541	392.528	9.11673	0	0	1.54534		-7.38623
		evglcl|G0WVJSS01AZ3NS	mucin-19	199.223	245.33	192.28	163.219	97.1795	151.443			-1.14934
		evgTRINITY_DN71530_c0_g1_i1	neutral ceramidase-like isoform X1	221.089	200.531	153.327	315.145	1548.05	330.703		0.739821	2.98284
		evgTRINITY_DN91816_c21_g1_i1	sphingomyelin phosphodiesterase-like	245.992	197.686	101.942	327.464	1577.04	372.427			3.76237
		evgTRINITY_BU_DN64887_c0_g1_i1	WD repeat-containing protein 20	0	0	0	0	325.637	1.54534	8.18386
		evgTRINITY_BU_DN79008_c0_g2_i2	WD repeat-containing protein 7-like isoform X5	258.766	228.257	226.244	166.113	171.65	134.986	-0.592668	-0.668128
		evgTRINITY_DN90047_c9_g1_i1	WD repeat-containing protein 19-like	597.063	403.764	489.817	248.421	247.211	199.349	-1.99488	-1.1648
		evgTRINITY_DN91057_c12_g1_i1	WD repeat-containing protein 48-like	194.972	164.265	212.171	107.786	211.408	137.535		-0.645638
		evgTRINITY_DN80761_c2_g1_i1	WD repeat domain phosphoinositide-interacting protein 3-like	124.515	81.7767	104.428	98.547	245.506	77.267			1.27456
		evgTRINITY_DN93293_c13_g2_i1	WD repeat and FYVE domain-containing protein 2-like isoform X2	130.588	98.132	146.696	139.608	283.014	114.355			1.14256
		evgTRINITY_DN90204_c9_g1_i1	WD repeat domain phosphoinositide-interacting protein 4-like	152.454	125.154	159.128	137.555	247.211	140.626			0.735997
		evgTRINITY_DN97100_c0_g1_i1	zonadhesin-like (Bp v1)	889.824	1423.63	1078.26	2096.18	646.158	2463.55		0.997719
		evgTRINITY_DN81849_c0_g2_i1	zonadhesin-like (Bp v2)	3.03694	1.21598	1.65759	0	264.26	0			6.86374
	Cell adhesion	evglcl|G0WVJSS02JOXY3	calmodulin-like protein 5 isoform X2	0	0	0	2.05306	313.77	4.63602	7.98824
		evglcl|HJ4YRIA01B20H7	calmodulin-like protein 5, transcript variant X3	0	0	0	3.07959	281.735	3.09068	7.83434
		evglcl|G0WVJSS01A2NX5	calmodulin-like	504.728	469.228	483.991	256.13	273.211	312.344	-0.791668	-0.78487	-0.854119
		evglcl|G0WVJSS01CBG19	calmodulin-like	275.08	321.155	298.531	124.837	157.533	220.304	-0.832995	-0.817159	-0.941237
		evglcl|G0WVJSS01C2BXW	calmodulin-like	1465.8	1887.16	1357.33	800.962	751.607	976.022	-0.89715	-0.835519
		evglcl|G0WVJSS01EL893	calmodulin-like	220.233	285.209	219.862	90.6017	105.84	109.271	-1.24296	-1.28232
		evglcl|G0WVJSS01AUWQL	calmodulin-like	142.068	193.533	142.047	45.9886	72.5095	43.4395	-1.55388	-1.83153
		evgTRINITY_DN88156_c2_g1_i1	calmodulin-like protein 5, transcript variant X2	0.607388	2.13331	0	6.15919	2601.09	4.63602			1.982
		evgTRINITY_DN90299_c2_g1_i1	putative calmodulin	5.46649	7.11102	4.14397	20.5306	436.455	21.6348			6.17942
		evgTRINITY_DN22045_c0_g1_i1	calmodulin-A-like	2.42955	3.55551	1.65759	11.2918	158.556	1.54534			5.7564
		evgTRINITY_DN14883_c0_g1_i1	calreticulin	29.762	307.196	1.65759	0	0	1.54534		-6.65265
		evgTRINITY_DN76199_c1_g1_i1	lysosomal Pro-X carboxypeptidase-like isoform X1	162.78	185.598	246.981	659.033	746.748	610.41	1.75764	1.66257	1.87811
		evgTRINITY_DN80734_c2_g1_i1	D-alanyl-D-alanine-carboxypeptidase/endopeptidase AmpH-like	100.219	125.154	119.28	368.525	148.327	310.613	1.26467	1.54899
		evgTRINITY_DN5705_c0_g1_i1	carboxypeptidase B-like	83.2122	78.9323	39.7821	137.555	117.638	196.258	1.15576	1.28919
		evgTRINITY_DN61923_c0_g1_i1	zinc carboxypeptidase A 1-like	10.3256	8.54033	9.01728	171.431	11711	89.6298		3.72281	1.2177
		evgTRINITY_BU_DN6973_c0_g1_i1	zinc carboxypeptidase A 1-like	5.43613	0	10.7743	48.247	2567.58	29.3615		2.73932	8.77315
		evgTRINITY_BU_DN79986_c0_g1_i1	cytosolic carboxypeptidase 2-like	297.025	255.719	180.271	141.908	75.4931	0	-1.74759
		evgTRINITY_DN18455_c0_g1_i1	glutamate carboxypeptidase 2-like	555.153	340.618	446.72	177.59	291.539	146.807		-1.48757
		evgTRINITY_DN91304_c6_g1_i2	carboxypeptidase Q-like	7.89605	9.95542	6.47288	13.6734	133.46	43.2695			3.96422
		evgTRINITY_DN91002_c1_g2_i1	retinoid-inducible serine carboxypeptidase-like	180.394	215.464	276.817	367.498	1082.61	282.797			2.23926
		evgTRINITY_GG_454Uninf_3959_c0_g11_i1	cathepsin B-like	58.8559	67.448	65.4001	286.31	95.3553	201.064	1.59758	1.99814
		evglcl|G0WVJSS01AN4TX	cathepsin B-like	69.1997	75.0141	94.3913	349.75	105.619	233.671		1.85273
		evgTRINITY_DN12464_c0_g2_i1	cathepsin B-like	2949.52	2316.93	3692.44	13294.2	4739.15	9260.05		1.89722
		evglcl|HJ4YRIA01B75Y9	cathepsin B-like	49.2592	59.8392	48.1446	239.274	66.6106	143.547		1.8415
		evglcl|G0WVJSS01DSG7B	cathepsin B-like	4.90162	7.47368	14.1807	31.2682	13.7245	18.2196		1.43537
		evgTRINITY_DN29810_c0_g1_i1	cathepsin B-like precursor	199.223	216.175	218.802	560.486	12713.5	406.425		1.178	5.88878
		evglcl|G0WVJSS01B91MZ	cathepsin D-like	1.36055	1.18754	3.3649	10.8094	297.165	7.63398			6.97819
		evglcl|G0WVJSS02HEXIB	cathepsin L1-like (Bp v1)	0	0	0	7.13439	1425.74	0	1.14449
		evgTRINITY_GG_13499_c9_g1_i1	cathepsin L1-like (Bp v2)	0	0	0	3.07959	199.508	1.54534	7.34841
		evgTRINITY_DN15418_c0_g1_i1	cathepsin L1-like (Bp v3)	95.8702	12.0887	0.828794	104.706	2932.52	75.7217	4.82257		6.28537
		evglcl|G0WVJSS02IJIX3	cathepsin L1-like (Bp v4)	10.7265	0	0.828794	7.18572	293.158	0	4.55596
		evgTRINITY_GG_11286_c0_g1_i1	cathepsin L1-like (Bp v5)	317.992	54.8259	105.398	841.253	5244.57	462.629	3.77188		4.99835
		evglcl|G0WVJSS02GVR61	cathepsin L1-like (Bp v5)	335.26	72.3119	58.7698	830.372	4732.44	475.022	3.69959		4.88299
		evglcl|G0WVJSS01EELMP	cathepsin L1-like (Bp v6)	166.686	116.806	240.889	345.674	287.038	461.485	1.59376	1.18569
		evgTRINITY_DN87352_c2_g1_i1	cathepsin L1-like (Bp v7)	1.21478	2.13331	0	29.2972	6260.25	12.8727		3.82317	12.3251
		evgTRINITY_DN99958_c0_g1_i1	cathepsin L1-like (Bp v8)	7.38584	50.0473	7.65805	157.121	15282.8	89.3052		2.45782	9.41498
		evglcl|G0WVJSS02JV5JD	cathepsin L1-like (Bp v9)	24.7754	12.0603	5.52805	45.075	154.055	41.2915		1.57638	3.37959
		evgTRINITY_DN92022_c9_g2_i1	cathepsin L1-like (Bp v6)	4167.08	3875.29	5738.03	8670.05	5351.08	10556.3		1.49185
		evgTRINITY_DN90707_c15_g1_i1	cathepsin L1-like (Bp v2)	0.607388	2.84441	0	9.23878	507.26	9.27204			8.37914
		evgTRINITY_DN74158_c2_g1_i1	cathepsin L1-like (Bp v10)	99.6117	115.91	29.0078	65.698	2371.69	77.267			4.82773
		evglcl|G0WVJSS02G6BU0	cathepsin L1-like (Bp v5)	7.73813	5.89503	5.81813	12.2773	103.556	4.09515			3.97574
		evgTRINITY_DN87352_c1_g1_i1	cathepsin-L-like cysteine peptidase	4309.5	2138.25	1534.28	10392.6	31194.3	6000.17			3.57619
		evgTRINITY_DN61331_c0_g1_i1	cathepsin Z-like	53.4502	59.7325	31.4942	150.9	3065.42	186.986		1.78913	5.95251
	Cell proliferation, migration, differentiation, cell cycle regulation	evgTRINITY_GG_454Uninf_11159_c0_g1_i1	CUGBP Elav-like family member 1	71.2406	56.6819	55.3468	68.5107	140.211	75.4899			1.17231
		evgTRINITY_DN72262_c0_g1_i1	multiple epidermal growth factor-like domains protein 10 (Bp v6)	3.64433	0.711102	1.65759	17.451	1.7049	18.5441	2.4223
		evgTRINITY_BU_DN81026_c1_g1_i4	multiple epidermal growth factor-like domains protein 10 (Bp v1)	27.3446	41.5852	34.3038	15.9934	10.6727	19.6722	-1.13432
		evgTRINITY_DN90923_c9_g2_i1	multiple epidermal growth factor-like domains protein 10 (Bp v3)	162.343	124.08	158.449	52.6508	47.8737	57.9039	-1.48217	-1.42716	-1.64285
		evgTRINITY_DN89944_c0_g1_i1	multiple epidermal growth factor-like domains protein 10 (Bp v4)	9.71821	6.05148	1.89794	3.07959	65.6217	9.27204			3.38717
		evgTRINITY_DN89944_c3_g1_i1	multiple epidermal growth factor-like domains protein 10 (Bp v2)	9.71821	14.222	14.0895	6.15919	88.655	6.18136			2.75773
		evgTRINITY_DN88974_c7_g1_i1	multiple epidermal growth factor-like domains protein 10 (Bp v5)	6.68127	0.711102	4.97276	7.18572	23.8686	0			2.44458
		evgTRINITY_GG_6717_c17_g2_i2	epidermal growth factor receptor substrate 15-like 1 isoform X2	112.148	140.798	158.225	80.8291	282.281	0			1.11737
		evgTRINITY_DN86505_c1_g1_i1	peptide chain release factor 1	0	0	0	0	620.585	1.54534	8.94252
		evgTRINITY_DN93550_c8_g1_i1	thymidine phosphorylase-like isoform X1	1115.77	1190.76	1369.8	1072.05	2455.18	988.184			0.972645
		evglcl|G0WVJSS01CRM7G	translationally-controlled tumor protein homolog	1.85253	2.89418	2.51953	33.352	31.285	29.9023	3.48894	3.51336
		evglcl|HJ4YRIA01B6V9R	translationally-controlled tumor protein homolog	6.88171	13.9945	14.6862	34.2348	8.95074	23.211		1.24787
		evglcl|G0WVJSS01EQ9EF	translationally-controlled tumor protein homolog	55.8858	36.6644	66.7676	97.9516	65.4171	101.962		0.895555
	Cell-to-cell signaling	evgTRINITY_GG_3204_c4_g1_i1	clathrin heavy chain linker domain-containing protein 1-like	192.542	123.021	182.335	94.4409	73.3109	60.2683	-1.12236
		evgTRINITY_DN90566_c5_g1_i1	clathrin light chain A-like isoform X5	300.384	281.618	269.723	383.215	629.399	313.642			1.12143
		evgTRINITY_DN94998_c0_g1_i1	guanylate kinase	0.607388	0	139.237	0	0	0	-6.79928	-6.66676
		evgTRINITY_DN90967_c4_g1_i1	hemorrhagic metalloproteinase-disintegrin-like kaouthiagin isoform X1	43.732	9.24432	29.0078	73.9103	3.40981	120.537		1.78847
		evgTRINITY_DN5577_c0_g1_i1	nicotinic acetylcholine receptor subunit type E	22.4734	17.0664	15.7471	160.139	13.6392	98.9018		2.76674
		evglcl|G0WVJSS01BO5WT	cytidine deaminase	156.749	115.369	117.987	42.1597	66.5424	58.862	-1.21296	-1.36886
		evglcl|G0WVJSS01B43Z2	cytidine deaminase	104.349	93.9579	94.5073	39.9218	25.4372	38.6181	-1.48248
		evglcl|G0WVJSS01BMBAP	cytidine deaminase-like	168.004	161.484	135.201	44.1717	49.2376	62.2927	-1.56971	-1.54228	-1.65886
		evglcl|G0WVJSS01AUR8H	cytidine deaminase	376.884	347.224	270.999	106.082	107.665	108.437	-1.62314	-1.63737	-1.65718
		evglcl|G0WVJSS01BJACA	cytidine deaminase	169.753	160.204	95.2118	49.1298	39.9118	41.4924	-1.69397	-1.65465
		evgTRINITY_GG_4941_c6_g1_i1	cytidine deaminase	899.712	912.536	757.832	243.514	251.32	276.508	-1.73471	-1.73678	-1.79793
		evglcl|G0WVJSS02HDBUG	cytidine deaminase	818.583	615.117	401.575	152.84	177.515	196.258	-1.79871	-1.83349
		evgTRINITY_DN80783_c0_g1_i1	endonuclease V	0	0	0	1.02653	225.047	0	7.48723
		evgTRINITY_DN102266_c0_g1_i1	endonuclease G (Bp v1)	62.9315	13.0772	3.39805	300.261	17.1002	138.478		2.98216
		evglcl|G0WVJSS02I7SKE	endonuclease G (Bp v2)	6.54765	1.4222	0	25.4683	3.90423	14.3253		2.72894
		evgTRINITY_DN91244_c15_g1_i1	endonuclease 8-like 1	244.777	319.996	276.776	407.533	298.358	417.458		0.544338
		evgTRINITY_DN17616_c1_g1_i1	myc proto-oncogene protein-like	266.643	342.751	365.498	669.299	375.079	508.386		0.843447
		evglcl|G0WVJSS02IMG9C	ribonuclease UK114-like	29.1546	21.4042	13.6254	72.8837	66.3889	66.4497	1.66165		1.59711
		evglcl|G0WVJSS01BPNKF	ribonuclease UK114-like	207.119	324.262	371.3	700.095	680.257	749.49	1.23729	1.25325
		evglcl|G0WVJSS02FHHI9	ribonuclease kappa-B-like	120.87	142.22	139.237	216.598	257.44	224.074	0.793168
		evgTRINITY_DN94612_c0_g2_i1	5'-3' exoribonuclease 2-like	1311.44	1631.18	1583.82	2379.55	1633.3	2457.09		0.668115
		evgTRINITY_DN83424_c3_g1_i1	poly(U)-specific endoribonuclease-C-like	270.774	525.959	343.27	344.915	1115.01	258.072			1.52276
		evgTRINITY_DN45020_c0_g1_i1	ribonuclease Oy-like	299.442	297.952	308.311	242.261	593.306	247.255			0.948152
		evgTRINITY_DN88423_c1_g2_i1	ATP-dependent RNA helicase DDX51/DBP6	0	0	0	0	179.816	0.77267	7.16517
		evgTRINITY_GG_454Uninf_1538_c2_g4_i1	probable ATP-dependent RNA helicase DDX43	275.493	407.54	280.223	495.414	540.642	519.992	0.691173	0.647934
		evgTRINITY_GG_14768_c1_g2_i4	ATP-dependent RNA helicase DDX3Y-like isoform X2	5.51509	6.70569	19.891	53.7287	22.5047	170.374		3.26533
		evgTRINITY_DN90150_c14_g1_i1	probable ATP-dependent RNA helicase DDX4	420.92	558.926	392.019	896.162	523.405	791.214		0.871623
		evgTRINITY_DN94503_c0_g1_i1	probable ATP-dependent RNA helicase DDX31	513.85	756.612	710.276	1066.57	601.831	968.929		0.61958
		evgTRINITY_BU_DN80044_c6_g1_i1	putative ATP-dependent RNA helicase TDRD12	145.773	132.976	165.759	87.2552	134.687	94.3121		-0.714349
		evgTRINITY_DN92857_c14_g1_i1	ATP-dependent RNA helicase dbp2-like	288.509	230.397	261.07	368.525	441.57	313.704	0.526166		0.733561
		evgTRINITY_DN86675_c0_g1_i1	transcription initiation factor TFIIA large subunit	0	0	0	0	318.817	1.54534	7.98777
		evglcl|G0WVJSS02IN4O6	transcription initiation factor TFIID subunit 10-like	3.63826	0	2.80132	13.93	5.47274	7.44854		2.14743
		evglcl|G0WVJSS01BPZFM	Y-box factor homolog	87.306	142.796	109.218	204.29	198.161	205.963	0.842786	0.845552
		evglcl|G0WVJSS02GRNYU	Y-box factor homolog	81.1531	107.071	119.098	163.927	198.894	177.498	0.811558	0.723387	0.926419
		evgTRINITY_GG_9319_c1_g1_i4	zinc finger protein 235-like	16.6667	14.1011	18.3329	52.5379	48.6238	66.5424	1.74622
		evgTRINITY_GG_25720_c0_g1_i1	zinc finger protein 233-like	19.6672	34.9364	34.9585	64.9795	86.4557	88.8262	1.41964	1.34258	1.5167
	Protease	evglcl|G0WVJSS01CX50J	chymotrypsin-like elastase family member 1	0	3.1004	0	4.34223	622.784	0	7.16873
		evgTRINITY_GG_454Uninf_1376_c0_g4_i1	chymotrypsin-like elastase family member 1	2.66643	0	3.47265	30.4367	2903.62	19.2549		3.37258	1.21253
		evgTRINITY_DN89061_c3_g1_i1utrorf	dipeptidase 1-like	37.0507	6.39992	41.4397	257.259	103.999	301.341	2.94585	3.26874
		evgTRINITY_DN92814_c7_g1_i1	putative N-acetylated-alpha-linked acidic dipeptidase	135.94	132.265	43.0973	1258.9	3.73374	1239.66		3.57446
		evgTRINITY_DN90297_c12_g1_i1	xaa-Pro dipeptidase-like isoform X2	491.705	444.104	475.139	691.913	2486.06	620.207			2.37389
		evgTRINITY_BU_DN82229_c0_g1_i1	heparanase-like isoform X1	175.535	1.4222	36.4669	468.098	0	536.233		2.78574
		evgTRINITY_DN63840_c0_g1_i1	Kunitz protein 8	0	0	0	2.05306	721.771	0	9.16531
		evglcl|G0WVJSS01EKDHJ	Biomphalaria glabrata BPTI/Kunitz domain-containing protein 4-like, transcript variant X2	5.46649	9.95542	7.45914	16.4245	66.6958	57.1931	2.55164		3.67141
		evgTRINITY_DN102302_c0_g1_i1	Biomphalaria glabrata BPTI/Kunitz domain-containing protein 4-like, transcript variant X1	47.7589	44.0812	45.5837	138.448	345.09	219.995	2.34534	1.93997	2.87898
		evglcl|G0WVJSS02H6NS0	Biomphalaria glabrata BPTI/Kunitz domain-containing protein 4-like, transcript variant X2	5.00488	9.25143	10.7743	18.5392	46.3904	23.1956	1.76521
		evgTRINITY_DN43933_c0_g1_i1	probable serine carboxypeptidase CPVL (Bp v2)	1.21478	0	0	1.02653	110.58	0	5.57156
		evgTRINITY_DN79814_c0_g1_i1	probable serine carboxypeptidase CPVL (Bp v4)	32.6775	24.5615	34.6021	116.901	77.5731	91.9632	1.62761	1.74719
		evgTRINITY_DN92914_c20_g1_i1	probable serine carboxypeptidase CPVL (Bp v1)	21.866	16.3553	32.0826	79.8231	60.4559	74.0836	1.59119	1.68939
		evgTRINITY_GG_13276_c35_g1_i1	probable serine carboxypeptidase CPVL (Bp v3)	27.9399	34.1329	24.8638	62.6184	63.0814	92.7204	1.31654	1.39962
		evgTRINITY_DN92638_c9_g1_i1	probable serine carboxypeptidase CPVL (Bp v5)	63.1684	2.84441	66.3035	260.739	1.7049	316.795		2.6787
		evgTRINITY_DN79814_c0_g2_i1	probable serine carboxypeptidase CPVL (Bp v4)	343.903	452.588	396.371	238.279	149.179	144.474	-1.16321	-1.65498	-1.44336
		evglcl|G0WVJSS02JLW59	serine protease beta	0	0.775101	0	3.07959	1150.4	0	9.14326
		evgTRINITY_DN102420_c0_g1_i1	serine protease alpha	0	2.39641	0	4.10613	1825.83	3.09068	8.9678
		evgTRINITY_GG_454Uninf_9563_c0_g3_i1	serine protease beta	0	3.66929	0	1.8067	607.781	2.87433	6.95815
		evgTRINITY_DN97272_c0_g1_i1	putative serine protease K12H4.7	236.881	219.73	192.28	661.086	1121.83	596.502	1.8726	1.52634	2.34563
		evgTRINITY_DN102331_c0_g1_i1	serpin B6-like	294.814	83.9029	4.56665	9664.91	6.81961	10442.1	5.78957	6.28574
		evgTRINITY_DN12476_c0_g1_i1	putative tyrosinase-like protein tyr-1	89.3772	42.6661	8.67747	3474.86	10.2124	2598.27	5.42133	5.98644
	Protease inhibitor	evgTRINITY_DN84471_c0_g1_i1	cyclin-dependent kinase 18-like isoform X1/cyclin-dependent kinase 17-like (LOC106056030), transcript variant X3	10.0219	21.3331	0	89.3083	0	111.265		3.28853
		evgTRINITY_BU_DN81814_c10_g2_i2	cyclin-dependent kinase-like 2 isoform X2/cyclin-dependent kinase-like 1, transcript variant X2	32.3738	22.9401	40.2379	9.03348	7.94485	4.66693	-2.79166	-2.13572
		evgTRINITY_DN73989_c0_g1_i1	Cyclin-dependent kinase 8	0.607388	0	299.195	0	0	0		-7.76263
		evgTRINITY_DN102416_c0_g1_i1	EF-hand calcium-binding domain-containing protein 1-like	551.205	528.626	451.543	377.764	277.899	275.071	-0.717617	-0.656179	-0.964533
		evglcl|G0WVJSS01DNA7Z	EF-hand calcium-binding domain-containing protein 2-like	89.3164	106.118	73.0333	51.1623	51.5563	45.263	-0.853822	-0.893496
		evgTRINITY_BU_DN68941_c0_g2_i1	peptidase inhibitor 16	0	0	0	0.513266	96.9238	0	6.28355
		evglcl|G0WVJSS02G429N	serpin B3-like (Bp v1)	30.9829	15.0896	0	3930.46	0	4267.4	7.43628	8.13634
		evgTRINITY_DN99755_c0_g1_i1	serpin B3-like (Bp v2)	19.4364	7.11102	7.45914	584.097	6.81961	231.801	4.54595	5.54126
		evgTRINITY_DN94932_c0_g1_i1	serpin-Z2B-like	23.0808	6.39992	6.63035	182.723	13.6392	160.715	3.26182	3.78992
		evglcl|G0WVJSS01A8DEO	multicystatin-like isoform X2	34.7791	52.9273	17.3384	148.888	11.5763	147.008		2.58496
		evglcl|G0WVJSS02I3Q0Z	multicystatin-like isoform X1	84.4513	92.173	48.6502	265.625	26.3578	358.225		2.33813
		evglcl|G0WVJSS02HY3RL	cystatin-like	4.71941	16.3198	15.9377	65.5646	2725.24	35.3419		1.97946	7.72469
		evglcl|HJ4YRIA01EKANC	cystatin-like	33.874	55.6366	47.0506	248.01	12403.1	111.249		1.93632	8.53167
		evglcl|G0WVJSS01DHOPK	multicystatin-like isoform X1	157.538	228.633	65.425	543.425	39.5197	511.446		1.79331
		evgTRINITY_DN5519_c0_g1_i1	multicystatin-like isoform X2	1127.56	1859.5	480.037	3884.95	274.455	3681.14		1.69542
		evglcl|G0WVJSS01EMYF5	multicystatin-like isoform X2	523.137	888.202	227.777	1616.9	123.759	1608.5		1.54496
		evglcl|G0WVJSS02IJ2Y8	cystatin-like	2.70288	2.70219	0	26.2074	992.458	18.7759			8.82124
		evglcl|G0WVJSS01AKGH7	X-box-binding protein 1-like	20.2989	24.8103	26.3059	37.9509	36.161	61.18	0.998496
	Protein modification, biosynthesis	evglcl|G0WVJSS02GMBGM	arginine kinase	136.826	251.396	228.009	515.37	157.976	662.024		1.51785
		evgTRINITY_DN99919_c0_g1_i1	arginine--tRNA ligase, cytoplasmic-like (Bp v1)	529.418	610.125	370.96	1029.24	1062.68	737.746	0.954142
		evgTRINITY_GG_17475_c0_g1_i1	arginine--tRNA ligase, cytoplasmic-like (Bp v2)	11.1942	0	22.7172	30.139	84.7167	28.3106			2.79974
		evgTRINITY_DN37888_c0_g1_i1	probable glutamate--tRNA ligase	66.8127	95.2876	51.3852	59.5388	240.391	54.0869			1.71523
		evgTRINITY_DN89418_c19_g1_i1	cytosolic non-specific dipeptidase-like	614.592	521.003	782.854	1188.48	1632.62	1092.85	1.28197	0.826333	1.31477
		evgTRINITY_DN88588_c0_g1_i1	E3 ubiquitin-protein ligase XIAP-like	203.475	399.639	304.167	645.688	719.469	469.444	1.14827
		evgTRINITY_DN90010_c20_g1_i1	E3 ubiquitin-protein ligase XIAP-like, transcript variant X2	332.849	297.952	308.311	223.784	139.802	146.807	-0.878553	-0.76632	-1.18256
		evgTRINITY_DN91246_c6_g1_i1	elongation factor 1-alpha	101.239	199.983	453.707	6.15919	2.55736	0	-6.24356	-6.23269
		evgTRINITY_DN90727_c11_g2_i1	translation elongation factor, EF-1, alpha subunit	11.5404	92.4432	7.45914	0	0	1.54534		-5.15578
		evgTRINITY_GG_10529_c13_g1_i1	17-beta-hydroxysteroid dehydrogenase type 6-like (Bp v2)	16.9036	15.3385	7.02817	92.3878	34.081	61.9064	2.22596	2.51188
		evgTRINITY_DN89772_c3_g1_i1	17-beta-hydroxysteroid dehydrogenase type 6-like (Bp v1)	416.668	434.483	478.214	267.925	458.619	339.975		-0.555844
		evgTRINITY_BU_DN82351_c5_g1_i6	17-beta-hydroxysteroid dehydrogenase type 6-like (Bp v2)	65.5008	0	65.9223	500.865	233.947	86.5545			2.29952
		evgTRINITY_DN97309_c0_g1_i1	17-beta-hydroxysteroid dehydrogenase 13-like	448.836	601.173	555.292	771.726	1324.03	702.867			1.27565
		evgTRINITY_DN82448_c0_g1_i1	guanine-N7 methyltransferase	0	0	0	0	219.967	1.54534	7.45798
		evgTRINITY_DN94652_c0_g1_i1	betaine--homocysteine S-methyltransferase 1-like	48.9312	8.53322	71.0193	499.018	496.11	483.352	3.51153	3.49174	3.47897
		evglcl|G0WVJSS01BBXHH	betaine--homocysteine S-methyltransferase 1-like	4.55541	1.82753	9.21619	48.4831	41.2416	26.688	2.82666	2.74415
		evgTRINITY_GG_16258_c9_g1_i1	phosphoethanolamine N-methyltransferase 3-like	16.3995	19.1997	17.4047	118.051	76.7207	111.265	2.51411	2.66334
		evgTRINITY_DN87998_c0_g1_i3	histone-lysine N-methyltransferase 2C-like isoform X6	54.6224	4.40883	16.0869	123.009	68.9463	240.069	2.53972	2.79387
		evgTRINITY_DN86265_c1_g1_i1	phosphoethanolamine N-methyltransferase-like isoform X1	64.3832	54.0437	37.2957	126.263	143.212	106.629	1.26531	1.14974	1.426
		evgTRINITY_DN90856_c16_g1_i1	putative methyltransferase	129.932	145.776	219.63	379.817	225.047	375.518	0.983164	1.17769
		evgTRINITY_DN90342_c7_g1_i1	arsenite methyltransferase-like	146.988	209.064	215.486	281.27	277.899	268.889	0.533893
		evgTRINITY_DN89967_c14_g1_i1	methyltransferase-like protein 24	42.5172	49.066	36.4669	86.2287	269.375	137.535		1.36633	2.62452
		evgTRINITY_DN82928_c0_g1_i1	tRNA (guanine-N(7)-)-methyltransferase non-catalytic subunit wuho-like	202.26	287.996	208.856	553.034	213.113	421.878		1.53683
		evgTRINITY_DN65114_c2_g1_i1	serine hydroxymethyltransferase, cytosolic-like	658.409	607.281	555.292	469.936	354.62	429.605	-0.537549		-0.841613
		evgTRINITY_DN48885_c0_g1_i1	probable caffeoyl-CoA O-methyltransferase 1	35.8359	26.3108	27.3502	33.8755	576.257	54.0869			4.22888
		evgTRINITY_DN83350_c3_g1_i1	arsenite methyltransferase-like isoform X3 [	68.3069	98.132	86.1945	101.627	167.081	77.267			0.959929
		evgTRINITY_DN84195_c0_g2_i1	ornithine decarboxylase-like (Bp v2)	2.42955	2.13331	2.48638	27.7164	17.049	61.8136	3.69689	4.51886
		evgTRINITY_DN76061_c1_g1_i1	ornithine decarboxylase-like (Bp v1)	4181.83	4019.08	4061.81	5716.53	6662.76	4892.53			0.677139
		evglcl|G0WVJSS02H8DB7	ornithine decarboxylase antizyme 1-like	92.2562	95.7356	131.206	99.3683	2.6767	134.908			-4.88456
		evgTRINITY_BU_DN79421_c1_g1_i1	putative phospholipase A-2-activating protein	0	0	0	1.02653	323.523	0	8.64271
		evgTRINITY_GG_10209_c0_g1_i1	acidic phospholipase A2 E-like	4.25172	0.711102	17.4047	34.9021	194.359	43.2695	3.53415	2.31497	4.61648
		evgTRINITY_DN16725_c0_g1_i1	basic phospholipase A2-like (Bp v1)	5.46649	2.84441	3.31517	16.4245	37.5079	13.9081	2.42224
		evgTRINITY_DN74667_c0_g1_i1	phospholipase A2-like	20.6512	9.24432	14.9183	45.1674	27.2785	37.0882	1.26573
		evgTRINITY_DN89542_c14_g1_i1	phospholipase B-like 1	111.152	160.709	215.486	282.296	347.8	261.163	0.869198
		evgTRINITY_BU_DN80498_c7_g2_i1	secretory phospholipase A2 receptor-like	115.811	106.246	36.2017	641.285	27.7388	760.184		3.64823
		evgTRINITY_DN90248_c16_g1_i1	cytosolic phospholipase A2-like, transcript variant X1	565.478	418.128	477.385	228.917	310.292	329.158	-0.749719	-0.818461
		evgTRINITY_DN91766_c9_g1_i1	N-acyl-phosphatidylethanolamine-hydrolyzing phospholipase D-like	97.7895	78.9323	125.148	42.0878	49.4422	26.2708	-1.34818	-1.55689
		evgTRINITY_DN25721_c0_g1_i1	basic phospholipase A2-like (Bp v2)	2.42955	6.39992	0	2.05306	1994.74	7.7267			9.21775
		evgTRINITY_GG_24991_c13_g1_i1	phospholipase B1	13.2471	25.5997	22.3774	17.451	961.566	13.9081			5.59829
		evgTRINITY_DN86939_c3_g1_i1	putative phospholipase B-like 2	155.491	84.6211	129.292	170.404	433.046	162.261			1.7687
	Signal transduction	evgTRINITY_BU_DN78922_c1_g2_i1	adenylate cyclase 9	0	0	0	0	140.092	0.77267	6.89597
		evgTRINITY_DN89898_c3_g3_i1	adenylate cyclase 9	0	0	0	0	79.8406	0.77267	6.13959
		evgTRINITY_DN90915_c9_g1_i1	ankyrin repeat domain-containing protein 45-like	119.655	83.91	106.086	68.7776	35.803	50.9962	-0.987254
		evgTRINITY_DN93415_c2_g1_i1	ankyrin-1-like (Bp v1)	181.609	163.553	146.696	72.8837	97.1795	52.5416	-1.13928	-1.38864
		evglcl|G0WVJSS01B1MBQ	ankyrin-1-like (Bp v2)	60.8117	0.682658	0	0	0	0	-5.63319
		evgTRINITY_DN64922_c0_g1_i1	ankyrin-3-like	80.2967	55.6224	42.2353	10.8402	655.945	7.7267			3.42763
		evgTRINITY_DN81919_c0_g1_i1	DCC-interacting protein 13-alpha-like isoform X2	172.498	115.198	150.84	149.874	313.702	142.171			1.63312
		evgTRINITY_DN86455_c4_g1_i1	F-box/LRR-repeat protein 5-like	385.692	302.929	381.245	252.527	347.8	213.257		-0.626736
		evgTRINITY_DN93193_c19_g1_i1	frizzled-5-like	17.6143	27.733	29.0078	70.8307	34.0981	122.082		1.9225
		evgTRINITY_GG_23295_c1_g1_i1	secreted frizzled-related protein 5-like, transcript variant X4	13.9274	6.39992	9.11673	20.5306	23.8686	35.5428	1.42882
		evgTRINITY_DN80560_c0_g1_i1	guanine nucleotide-binding protein-like 3 homolog	2.42955	0.711102	0.828794	282.481	0	469.521	7.16842	7.75677
		evglcl|G0WVJSS01A3Y42	guanine nucleotide-binding protein Rho	13.156	0.0213331	47.581	82.7179	0	116.101		2.24114
		evgTRINITY_DN74121_c1_g1_i1	guanine nucleotide-binding protein G(s) subunit alpha-like	33.4064	20.622	53.0428	25.6633	173.9	33.9975			2.23352
		evglcl|G0WVJSS01CMHNW	kynurenine 3-monooxygenase-like (Bp v3)	6.85741	11.655	29.0078	66.4885	201.503	70.3285	2.79924	2.71632	3.61148
		evgTRINITY_DN91287_c16_g1_i1	kynurenine 3-monooxygenase-like (Bp v1)	165.21	135.82	244.486	772.978	179.015	576.412		1.87164
		evgTRINITY_DN93390_c19_g1_i1	kynurenine 3-monooxygenase-like (Bp v2)	54.3309	81.4212	271.96	377.753	1783.65	380.417		1.44682	3.66429
		evgTRINITY_DN92879_c16_g1_i1	nucleoporin SEH1-like	274.369	388.503	395.973	703.523	440.053	572.224		0.839752
		evgTRINITY_DN88812_c0_g2_i1	nucleoporin Nup43-like	164.602	214.042	188.136	320.278	185.834	279.969		0.655728
		evgTRINITY_DN82079_c0_g1_i1	ras-related protein Rab-13-like	20.6512	28.4441	14.0895	43.1143	80.1305	32.4522			1.89234
		evgTRINITY_DN40909_c0_g1_i1	ras-related protein Rab-32-like isoform X3	127.552	99.3907	164.524	136.498	418.094	159.85			1.64293
		evgTRINITY_DN40900_c0_g1_i1	ras-related protein Rab-7a-like	346.053	226.863	354.823	250.741	728.113	230.379			1.19276
		evgTRINITY_BU_DN81773_c0_g1_i1	rho GTPase-activating protein 18-like	0	25.9054	36.4006	86.8035	33.365	79.3223	1.65897	1.96257
		evglcl|G0WVJSS02JC5PR	ubiquitin-like protein ISG15, transcript variant X2	4.17276	8.08523	15.573	29.4204	54.932	20.7385	1.86993	1.39246	2.52189
		evglcl|G0WVJSS01D3CPN	ubiquitin-like protein ISG15 isoform X2	18.7015	16.27	47.0175	46.5121	105.892	24.6327			1.87329
		evgTRINITY_DN64218_c0_g1_i1	ubiquitin-like protein ISG15 isoform X2	1262.29	1542.66	1294.89	2372.63	2654.4	1341.39			0.92749
		evgTRINITY_DN88541_c0_g2_i1	ubiquitin conjugation factor E4 B	0	0	0	1.02653	129.828	0	6.7424
		evgTRINITY_GG_2025_c0_g2_i1	probable E3 ubiquitin-protein ligase HERC4	89.6262	107.526	128.156	124.303	291.811	95.672			1.39856
REPRODUCTION, NEUROPEPTIDES, HORMONES, MONOAMINES		evgTRINITY_DN75299_c2_g1_i1	Temptin-like [closest to temptin from A. californica]	0	0	0	6.15919	700.715	0	9.12641
		evgTRINITY_DN85368_c1_g1_i1	Sodium- and chloride-dependent glycine transporter 2 (Bp v2)	0	0	0	0	221.637	1.54534	7.46876
		evgTRINITY_DN21856_c0_g1_i1	Ovipostatin 6	0	0.711102	0	1.02653	158.556	0	6.34541
		evgTRINITY_DN50475_c0_g1_i1	Temptin-like [closest to temptin from B. glabrata] (fragmented with evgTRINITY_DN91478_c2_g1_i1 and evgTRINITY_GG_20504_c21_g1_i2)	0.607388	9.24432	0	11.2918	463.734	6.18136	5.43938
		evgTRINITY_DN91478_c2_g1_i1	Temptin-like (maybe; %ID low) [closest to temptin from B. glabrata] (fragmented with evgTRINITY_DN50475_c0_g1_i1 and evgTRINITY_GG_20504_c21_g1_i2)	4.85911	3.55551	1.65759	137.555	3.40981	227.165	5.02577	5.58354
		evgTRINITY_GG_24487_c8_g1_i1	Dopamine receptor 2-like	5.66693	0	5.80156	76.1892	0	87.9608	3.69917	4.28207
		evgTRINITY_DN89437_c16_g1_i1	Sodium- and chloride-dependent glycine transporter 2-like (v1)	63.1684	3.55551	130.949	504.027	93.7697	451.239	2.4004	2.82905
		evgTRINITY_DN93533_c29_g1_i1	Insulin-related peptide 3-like	37.6581	15.6442	16.5759	54.4062	6.81961	71.0857		1.39903
		evgTRINITY_DN91266_c17_g1_i1	Sodium- and chloride-dependent taurine transporter-like	158.486	162.842	185.65	389.055	264.26	367.791	1.00833	1.14976
		evglcl|HJ4YRIA02GJKK4	Yolk ferritin precursor (fragmented with evglcl|G0WVJSS01D38L6 and evgTRINITY_DN102372_c0_g1_i1)	3.51678	1.07376	2.55268	16.0447	1787.05	8.43756		2.20183	9.32382
		evgTRINITY_DN100323_c0_g1_i1	Ovipostatin 3	0.607388	1.4222	0	8.21225	2227.68	7.7267			11.0567
		evgTRINITY_DN99945_c0_g1_i1	Yolk ferritin-like	0	1.4222	0.414397	6.15919	1472.34	4.63602			10.556
		evglcl|G0WVJSS01D38L6	Yolk ferritin precursor (fragmented with evglcl|HJ4YRIA02GJKK4 and evgTRINITY_DN102372_c0_g1_i1)	3.23738	0	1.27634	4.76311	1285.39	0			9.40375
		evgTRINITY_DN102372_c0_g1_i1	Yolk ferritin precursor (fragmented with evglcl|HJ4YRIA02GJKK4 and evglcl|G0WVJSS01D38L6)	33.3274	12.5581	6.43144	77.3697	8724.64	44.4904			8.90559
		evgTRINITY_DN93358_c18_g1_i1	Temptin-like isoform X1 or X2 (both good hits)	0.607388	5.68881	1.65759	5.13266	1383.68	7.7267			8.82689
		evgTRINITY_GG_4011_c32_g1_i1	FMRF-amide-like	0	4.34483	0.828794	1.02653	503.032	0			7.90274
		evgTRINITY_GG_20504_c21_g1_i2	Temptin-like [closest to temptin from B. glabrata] (fragmented with evgTRINITY_DN91478_c2_g1_i1 and evgTRINITY_DN50475_c0_g1_i1)	0.40695	0.618659	0	1.02653	98.748	1.03538			7.14297
		evgTRINITY_DN82611_c3_g1_i1	Ovipostatin 4	4.25172	57.4997	10.6832	33.4957	1342.37	43.115			5.75399
		evgTRINITY_DN85251_c1_g1_i1	Tyramine beta-hydroxylase-like/Dopamine beta-hydroxylase-like (Bp v3)	4.85911	2.84441	0.828794	1.02653	122.753	1.54534			5.24548
		evgTRINITY_GG_454Uninf_6218_c1_g1_i3	Tyramine beta-hydroxylase-like/Dopamine beta-hydroxylase-like (Bp v1)	9.60281	10.6594	6.31541	11.22	312.372	3.36884			5.0612
		evgTRINITY_DN79266_c0_g1_i1	Temptin-like (B. glabrata, A. californica non-specific)	1.82216	1.4222	2.48638	2.05306	49.4422	1.54534			4.45364
		evgTRINITY_GG_5765_c0_g2_i1	Tyramine beta-hydroxylase-like/Dopamine beta-hydroxylase-like (Bp v2)	163.387	130.132	138.409	81.096	107.409	71.0857	-0.731753	-0.925884
		evgTRINITY_DN90548_c21_g1_i1	FMRF-amide-like isoform X2	74.7088	64.7103	67.1323	22.5837	28.9834	55.6323	-0.938075
		evgTRINITY_DN87997_c3_g2_i1	Aryl hydrocarbon receptor nuclear translocator-like protein 1	34.6211	23.4664	33.1517	7.18572	17.049	16.9987	-1.12207	-1.29858
		evgTRINITY_DN90255_c11_g1_i1	Tyramine beta-hydroxylase-like/Dopamine beta-hydroxylase-like (Bp v1)	4460.49	4551.06	1991.91	471.25	1582.27	353.605		-3.1841

## Sheet: Shedding
CATEGORY		B. PFEIFFERI CDS	GENE OF INTEREST	NORMALIZED READ COUNTS						LOG2 FOLD CHANGE
				Control			Shedding			3v3 All 3 Reps	3v2 R1,R2	3v1 R3 only
				R1	R2	R3	R1	R2	R3
IMMUNE, STRESS, DEFENSE	Cell adhesion	evgTRINITY_DN89350_c16_g1_i1	protocadherin Fat 4-like	112.917	49.3786	125.791	247.604	316.965	325.793	1.62339	1.54696	1.752
		evgTRINITY_DN86761_c0_g2_i1	protocadherin Fat 3-like	7.16934	0	11.7562	19.5156	28.0567	1.80996		1.85163
		evgTRINITY_DN86761_c1_g2_i1	protocadherin Fat 3-like	18.8195	8.22977	27.0393	69.5243	53.0803	5.42988		1.74217
		evgTRINITY_DN41702_c0_g1_i1	protocadherin-23-like	552.935	686.157	315.066	357.38	3705	1503.17			1.53884
		evgTRINITY_DN70127_c0_g1_i1	cadherin-related tumor suppressor-like	874.659	642.951	717.129	274.438	387.486	285.068	-1.23752	-1.17595	-1.37928
		evgTRINITY_DN93250_c6_g1_i1	carbonyl reductase [NADPH] 1-like (Bp v1)	362.688	578.347	442.986	1027.95	1145.27	942.844	1.17846	1.23586	1.39677
		evgTRINITY_DN72929_c1_g1_i1	carbonyl reductase [NADPH] 1-like (Bp v2)	50.1854	71.3727	71.5483	135.121	124.67	100.86	0.896637
		evgTRINITY_DN87865_c0_g2_i1	carbonyl reductase	0	1.02872	349.159	0	0	0	-8.41489	-7.71939	-7.72711
		evglcl|G0WVJSS02HLSFU	caveolin-1-like (Bp v1)	72.3117	168.114	130.611	336.73	240.598	93.9731		1.21395
		evgTRINITY_DN99929_c0_g1_i1	caveolin-1-like (Bp v2)	1296.75	1327.05	1397.81	2002.79	439.05	590.952			-1.16238
		evgTRINITY_GG_9019_c0_g1_i1	dermatopontin 2	0.896167	2.04716	15.7533	359.782	26.343	37.7286	4.47857
		evgTRINITY_DN93533_c21_g1_i1	dermatopontin 2	0	6.17233	9.40497	241.554	24.0075	31.3394		4.36546	2.55119
		evglcl|G0WVJSS01ANSJ0	dermatopontin 2	0	2.06773	5.61947	78.5381	16.7885	13.4208	3.69785	3.87353
		evgTRINITY_GG_22084_c2_g1_i1	dermatopontin 3	0	2.28376	13.8723	400.497	31.8103	70.4164	4.84896	4.99942	3.63722
		evgTRINITY_DN102466_c0_g1_i1	dermatopontin-like isoform X1	1568.47	1225.16	1207.4	6249.3	7314.17	10226.7	2.57152	2.34385	2.95486
		evglcl|HJ4YRIA01DF23H	dermatopontin-like isoform X1	214.901	167.733	170.43	614.095	492.418	856.581	1.82512	1.58317	2.23172
		evglcl|HJ4YRIA01D6341	dermatopontin-like (Bp v1)	561.431	1085.8	573.915	268.437	186.092	209.729	-1.73946	-1.71581
		evgTRINITY_GG_24027_c0_g1_i1	dermatopontin-like (Bp v2)	110.049	203.111	93.4619	52.5702	14.6198	32.8417	-2.88417	-2.11515
		evgTRINITY_DN85078_c0_g1_i1	dermatopontin-like (Bp v2)	312.198	589.653	320.204	125.888	81.8725	84.0364	-2.61265	-1.97869
		evgTRINITY_DN97367_c0_g1_i1	dermatopontin-like (Bp v3)	299.32	460.106	162.236	42.6904	41.7059	83.2581	-2.4494	-2.86791
		evgTRINITY_DN102517_c0_g1_i1	mammalian ependymin-related protein 1-like (Bp v1)	1.79233	4.44408	6.40713	56.9246	82.1759	4.5249		3.99128
		evgTRINITY_GG_454Uninf_12265_c0_g1_i1	mammalian ependymin-related protein 1-like (Bp v2)	10.8347	19.6897	3.82077	67.8045	103.992	2.42534		2.85281
		evglcl|HJ4YRIA01D9WCK	mammalian ependymin-related protein 1-like (Bp v3)	2.93943	16.5624	3.87955	32.9326	36.0036	0		2.95645
		evgTRINITY_GG_8561_c37_g1_i1	ficolin-2-like (Bp v1)	4.3016	0	2.39827	2.37846	116.997	156.706	5.19772	4.25944	5.95224
		evgTRINITY_DN23074_c0_g1_i1	ficolin-2-like (Bp v2)	48.393	6.17233	8.19408	41.4707	875.825	1221.72	5.61523	4.22354	5.85956
		evgTRINITY_DN94795_c0_g1_i1	ficolin-1-like	133.529	442.35	457.317	1219.73	1685.68	1907.7	2.2184	2.68315	2.46485
		evglcl|G0WVJSS01CV8ZS	ficolin-1-like, partial	0.224042	9.7317	9.24038	20.1011	25.0539	29.3485	1.88516	1.76826	2.16355
		evgTRINITY_DN93021_c10_g1_i1	ficolin-2-like (Bp v3)	5.377	0	1.17562	1.21973	139.048	0.904979		4.56177
		evgTRINITY_DN90820_c12_g1_i1	ficolin-2-like isoform X1	28.8207	7.20105	5.83108	22.016	326.83	487.63			5.11157
		evglcl|G0WVJSS01BX361	galectin-4-like	31.6257	34.4107	37.3377	83.5878	67.0404	54.9956	0.982966
		evgTRINITY_DN91788_c11_g1_i1	galectin-4-like	649.551	751.111	885.489	1386.84	1603.08	1385.75	0.936183	0.971511	0.874673
		evgTRINITY_DN74702_c1_g1_i1	galectin-6-like	102.163	113.159	81.1178	65.8652	30.3316	52.4888	-0.989675	-1.31842	-0.875541
		evglcl|G0WVJSS02HYCA4	galectin-4-like	18.1832	14.4741	32.9762	45.3494	52.1552	18.6788		1.14715
	Cellular defense	evgTRINITY_GG_12842_c9_g1_i1	ADAM family mig-17-like (Bp v1)	35.8467	163.567	50.5517	241.506	207.771	197.286	1.36636
		evgTRINITY_DN85819_c3_g1_i1	ADAM family mig-17-like (Bp v2)	1498.39	1093.53	898.962	3296.92	2435.88	2953.82	1.31487	1.29339	1.34799
		evglcl|G0WVJSS01CIWKB	allograft inflammatory factor 1-like	31.6168	46.169	65.5291	12.6607	30.9685	125.023			1.39364
		evgTRINITY_DN97358_c0_g1_i1	aplysianin-A-like,	1135.95	1708.63	1196.62	2770.98	2715.94	1384.96		1.25536
		evgTRINITY_GG_9443_c0_g1_i1	GTPase IMAP family member 1-like	32.8893	17.7866	25.8049	55.156	67.5181	81.6563	1.42173	1.25759	1.69289
		evgTRINITY_DN91832_c20_g1_i1	GTPase IMAP family member 7-like (Bp v1)	234.796	243.807	213.763	351.281	400.377	294.118	0.594294	0.736222
		evgTRINITY_GG_13931_c1_g1_i1	GTPase IMAP family member 7-like (Bp v2)	103.122	159.071	98.5641	58.62	49.7666	48.3259	-1.19634	-1.14226
		evgTRINITY_BU_DN81665_c0_g1_i1	GTPase IMAP family member 8-like	0.896167	0	141.263	0	0.75829	0	-6.99613		-6.42623
		evgTRINITY_GG_11960_c3_g1_i1	GTPase IMAP family member 4-like	26.0157	24.8951	63.6011	86.5517	78.4754	37.3123		1.12666
		evgTRINITY_DN90760_c10_g1_i1	GTPase IMAP family member 4-like	11.7219	20.9962	32.9879	44.5322	46.0433	0		1.47693
		evglcl|G0WVJSS01A8VOM	late histone H1-like	234.428	255.936	223.873	111.08	166.634	175.72	-0.653964	-0.773355
		evglcl|G0WVJSS02IO01E	histone H1, gonadal-like	506.397	689.233	419.379	284.781	237.17	333.575	-0.915635	-1.46859
		evglcl|G0WVJSS02I38HS	Histone H3.3 (Bp v1)	139.193	181.127	154.394	226.649	256.044	159.738		0.695748
		evglcl|G0WVJSS02HF2FK	histone H2A.V	352.14	453.923	318.852	236.175	234.478	302.716		-0.67192
		evglcl|HJ4YRIA01DKT6E	late histone H1-like	115.202	114.281	101.903	41.0072	69.3835	99.8826		-0.988717
		evgTRINITY_DN91623_c14_g2_i1	macrophage-expressed gene 1 protein-like isoform X2	6158.5	5465.52	7178.75	3889.95	7872.5	10563.8			0.764298
		evgTRINITY_GG_16068_c11_g1_i1	multidrug resistance-associated protein 1-like isoform X2	0	21.6031	36.4442	37.8115	0	178.281			3.17717
		evgTRINITY_DN92637_c6_g1_i1	multidrug resistance-associated protein 1-like	49.2892	37.034	43.498	39.0312	188.814	338.462			2.97739
		evgTRINITY_BU_DN82182_c2_g2_i1	multidrug resistance-associated protein 1-like isoform X1	39.1804	34.4416	18.4808	0	7.93929	21.0408		-2.75668
		evgTRINITY_DN91832_c11_g1_i3	multidrug resistance-associated protein 4-like	327.101	277.6	258.637	146.367	267.676	170.136			-0.739228
		evgTRINITY_BU_DN77885_c1_g1_i1	multiple epidermal growth factor-like domains protein 10, transcript variant X5	0	0.514361	0.58781	0	53.0348	1.80996		4.82727
		evgTRINITY_GG_19531_c1_g1_i2	multiple epidermal growth factor-like domains protein 10 (Bp v1)	23.4975	43.8852	55.1954	26.6266	41.2585	165.258			2.19271
		evgTRINITY_DN90923_c14_g1_i1	multiple epidermal growth factor-like domains protein 6	20.0831	50.8806	39.207	50.8503	32.7202	142.534			1.95967
		evgTRINITY_DN90923_c15_g1_i1	multiple epidermal growth factor-like domains protein 10 (Bp v2)	23.372	77.5244	59.8274	94.858	33.8576	206.724			1.93799
		evgTRINITY_GG_454Uninf_4858_c0_g1_i1	multiple epidermal growth factor-like domains protein 6	17.6186	59.5835	64.6474	55.1682	33.1903	171.964			1.84487
		evgTRINITY_GG_2835_c2_g1_i1	multiple epidermal growth factor-like domains protein 6	10.6196	33.1865	19.7152	32.091	10.9421	71.5296			1.74986
		evgTRINITY_GG_454Uninf_2199_c0_g2_i1	multiple epidermal growth factor-like domains protein 10 (Bp v1)	14.5538	24.8128	43.3569	16.2833	16.6445	92.6427			1.73415
		evglcl|G0WVJSS01ERHRC	multiple epidermal growth factor-like domains protein 10 (Bp v3)	2.24042	6.30606	12.8143	4.46419	8.25019	24.0544			1.7325
		evgTRINITY_GG_19531_c1_g1_i1	multiple epidermal growth factor-like domains protein 10 (Bp v1)	24.9672	48.3087	69.4792	31.1518	27.4577	144.389			1.58966
		evgTRINITY_DN93193_c17_g1_i1	multiple epidermal growth factor-like domains protein 11, partial	61.719	131.738	170.677	158.955	133.429	361.005			1.55766
		evgTRINITY_GG_15582_c1_g1_i2	multiple epidermal growth factor-like domains protein 10 (Bp v3)	101.482	158.084	286.863	179.836	191.612	507.322			1.44828
		evglcl|G0WVJSS02IC8M5	multiple epidermal growth factor-like domains protein 11	46.6007	34.9765	74.0641	25.6142	67.4878	118.552			1.18679
		evgTRINITY_DN89410_c9_g1_i1	multiple epidermal growth factor-like domains protein 10 (Bp v3)	76.3086	122.058	145.401	64.5479	147.957	232.408			1.27643
		evgTRINITY_GG_16229_c0_g1_i1	multiple epidermal growth factor-like domains protein 10 (Bp v3)	197.067	324.695	253.276	165.187	257.508	519.431			1.15624
		evgTRINITY_DN92495_c12_g1_i2	multiple epidermal growth factor-like domains protein 10 (Bp v4)	955.314	675.87	882.891	557.414	1710.7	1541.18			0.887265
		evgTRINITY_DN68979_c0_g1_i1	Vacuolar sorting-associated 28 homolog; vacuolar protein sorting-associated protein 28 homolog	0.896167	0	322.12	0	0	0	-7.92543	-7.63279	-7.61856
		evgTRINITY_DN61848_c1_g1_i1	zinc carboxypeptidase A 1-like	57.3547	37.9392	24.688	268.34	13501.1	10.8598		7.15862
	Metal binding and transport	evgTRINITY_DN93642_c0_g1_i1	CDK5RAP1-like protein	588.782	648.177	778.261	1186.79	1065.4	1049.78	0.712163	0.744568	0.656519
		evgTRINITY_DN92914_c13_g1_i1	cytochrome P450 18a1-like	0	0.514361	0.387955	12.9779	24.5003	49.7015	5.36574	4.69752	6.34176
		evgTRINITY_GG_7613_c2_g1_i1	cytochrome P450 18a1-like	11.6502	8.22977	4.70248	32.9326	33.7363	77.1314	2.48544		3.21415
		evgTRINITY_DN92350_c7_g1_i2	cytochrome P450 3A24-like (Bp v1)	137.158	150.378	116.116	45.7153	86.3009	75.0861	-0.958268	-1.18485	-0.885891
		evgTRINITY_DN91183_c9_g1_i1	cytochrome P450 4F6-like isoform X2	128.018	88.47	146.953	54.8876	67.4878	54.9051	-1.31533	-0.978218
		evgTRINITY_DN91076_c26_g1_i1	cytochrome P450 10-like	56.4585	38.0627	30.5661	17.0762	9.85777	20.8145	-1.36496	-1.58586
		evgTRINITY_DN93348_c10_g1_i5	cytochrome P450 2J1-like	38.2843	94.1691	45.8375	5.37899	13.2473	6.75115	-2.74945	-2.68233
		evgTRINITY_DN92011_c14_g1_i1	cytochrome p450	250.031	301.199	376.199	1783.06	965.189	578.155		2.12567	0.911883
		evgTRINITY_DN76333_c0_g1_i1	cytochrome P450 26A1-like	130.84	88.47	108.157	25.6142	53.8386	83.2581		-1.44397
		evgTRINITY_BU_DN82356_c9_g1_i7	cytochrome P450 2J1-like	110.202	267.529	24.4999	3.43963	5.08054	15.3485		-4.86125
		evgTRINITY_GG_454Uninf_399_c0_g1_i1	cytochrome P450 18a1-like	2.6885	5.14361	2.35124	17.6372	19.488	65.1766			4.17175
		evgTRINITY_DN92655_c17_g1_i1	cytochrome P450 2E1-like	1325.23	1489.2	1293.37	801.811	3599.99	4987.28			1.88315
		evgTRINITY_GG_454Uninf_399_c1_g2_i1	cytochrome P450 2E1-like	115.812	143.383	92.686	92.2478	216.469	367.449			1.66415
		evgTRINITY_DN90506_c11_g1_i1	cytochrome P450 3A24-like (Bp v2)	595.055	453.666	480.829	524.482	940.279	974.663			0.947778
		evgTRINITY_DN91548_c20_g1_i1	cytochrome P450 2U1-like (Bp v1)	92.3052	24.6893	29.3905	252.483	192.606	131.222	1.96732	2.16838
		evgTRINITY_DN82707_c1_g1_i1	dihydropyrimidinase-like	520.673	408.402	308.013	204.914	157.724	251.584	-1.85416	-1.18864
		evgTRINITY_DN93675_c0_g1_i1	DBH-like monooxygenase protein 1	13.2095	15.4823	52.9029	168.127	991.047	110.091	3.93749	4.23454	1.9615
		evgTRINITY_GG_454Inf_483_c0_g1_i1	DBH-like monooxygenase protein 1	8.29851	14.3507	0	62.4011	40.9856	69.0952	2.85745	2.75959	3.17539
		evgTRINITY_DN90222_c9_g1_i1	DBH-like monooxygenase protein 1 homolog	131.737	34.9765	106.982	258.582	426.811	444.345	2.43568	1.88676	2.26692
		evgTRINITY_DN73816_c0_g1_i1	DBH-like monooxygenase protein 1 isoform X2	125.463	111.102	72.8885	223.137	255.544	180.996	1.88742	1.21852
	Oxidative/antioxidative response	evgTRINITY_DN69852_c1_g1_i1	chorion peroxidase-like	244.654	111.102	28.2149	78.0624	442.083	897.74			2.78416
		evgTRINITY_GG_7798_c0_g1_i1	dual oxidase 2-like	54.7469	93.1713	119.337	55.034	80.6138	198.218			1.14836
		evgTRINITY_DN85529_c2_g1_i1	dual oxidase 2-like	63.6279	149.165	130.494	101.237	148.625	287.783			1.32297
		evgTRINITY_DN91274_c9_g1_i1	dual oxidase 1-like	581.613	545.222	402.062	507.406	1898.66	946.608			0.954768
		evgTRINITY_DN93488_c9_g1_i1	peroxidasin homolog	3106.12	3533.66	3545.67	1583.2	2084.78	2466.97	-0.731259	-0.887916
		evgTRINITY_DN81450_c2_g1_i1	peroxiredoxin-5, mitochondrial-like	120.086	119.332	83.4691	58.5468	74.3124	68.7784	-0.6757
		evglcl|G0WVJSS01C7GCM	peroxiredoxin-2-like	33.3285	50.7777	58.8751	65.8652	70.6423	89.6382			0.925226
		evglcl|G0WVJSS02I6J60	peroxiredoxin 1-like	232.564	286.91	253.511	301.443	372.472	365.322			0.523452
		evgTRINITY_DN103351_c0_g1_i1	monomeric sarcosine oxidase-like	102.163	4.11488	31.7418	97.578	141.8	301.358			2.6397
		evgTRINITY_DN93655_c0_g1_i1	peroxisomal sarcosine oxidase-like	643.448	631.635	507.868	1067.26	726.441	963.803			0.713749
		evgTRINITY_DN95024_c0_g1_i1	thioredoxin domain-containing 12	0	0	0	2.43945	128.257	0.904979	6.63862
		evgTRINITY_GG_454Uninf_4801_c1_g6_i1	thioredoxin domain-containing 12	0	0	0	0	121.683	2.96833	6.56113
		evglcl|G0WVJSS01B0VVX	thioredoxin domain-containing 12-like isoform X2	0	0	0	2.43945	97.789	0	6.25243
		evgTRINITY_DN102363_c0_g1_i1	thioredoxin-2 isoform X2	0.896167	1.02872	0	0	95.5445	0	4.89364	5.23327
		evgTRINITY_DN25074_c0_g1_i1	tyrosinase-1	405.964	46.2925	0	393.691	5.64168	0.904979			-7.07622
		evgTRINITY_BU_DN75459_c0_g1_i1	tyrosinase-3	502.75	64.8094	22.3368	10.9775	1.51658	9.04979		-5.02397
		evglcl|G0WVJSS02FL5AL	tyrosinase-3	54.4063	8.94987	8.10003	3.35424	0	0		-3.51355
		evglcl|G0WVJSS02GKBAX	tyrosinase-3	81.5602	47.5681	21.9136	5.24482	6.0739	16.4344		-3.04579
		evglcl|G0WVJSS01EN4ZA	thioredoxin 4B	77.9666	103.901	103.455	137.829	160.757	142.987	0.627684	0.65119
		evglcl|G0WVJSS02HI8N6	thioredoxin domain-containing 12-like isoform X2	1.79233	1.19332	0	2.6834	292.275	2.02715		6.43637
		evgTRINITY_DN744_c0_g1_i1	thioredoxin domain-containing 12-like isoform X2	19.5364	9.0939	2.23368	17.7836	2034.15	7.49323		6.32224
		evglcl|G0WVJSS02HCZFC	thioredoxin, mitochondrial-like	14.1236	12.6533	0	10.6482	39.105	36.6607			1.99959
	Pattern recognition, carbohydrate binding, adhesion	evglcl|G0WVJSS02HVR9U	Angiopoietin-1 receptor	102.405	38.3919	71.0545	941.652	354.326	566.381	3.12798		3.55358
		evgTRINITY_GG_454Uninf_1208_c2_g8_i1	angiopoietin-related 2-like (Bp v1)	28.0769	26.1089	58.3343	90.406	122.684	78.2807	1.36226	1.49339
		evglcl|G0WVJSS01A3KFN	angiopoietin-related 2-like (Bp v2)	15.4051	38.8342	31.6595	82.3924	73.228	49.4028	1.2422	1.43391
		evgTRINITY_GG_454Uninf_7855_c3_g2_i1	angiopoietin-related 2-like (Bp v2)	63.2336	152.518	185.149	317.763	264.946	276.933	1.97936	1.11826
		evglcl|G0WVJSS02HGVD1	angiopoietin-related 2-like (Bp v2)	71.5142	55.1806	62.7546	102.555	124.761	108.444		0.84627
		evglcl|G0WVJSS02IZ21L	angiopoietin-related 2-like (Bp v1)	6.3359	11.8817	17.9047	3.20788	0	2.24435	-2.46449	-2.48118
		evgTRINITY_DN95055_c0_g1_i1	fibrinogen C domain-containing protein 1-like	22.4042	5.14361	1.17562	14.6367	528.528	6.33486		4.52646
		evglcl|G0WVJSS01A8299	angiopoietin-related protein 2-like	24.4474	25.2448	36.5971	49.1793	60.6404	42.1901	0.873823
		evglcl|HJ4YRIA02IW63O	Angiopoietin-1 receptor	2356.36	1111.57	1780.14	26097.1	7804.21	11698.6			2.74741
		evglcl|HJ4YRIA01B3DMZ	Angiopoietin-1 receptor	620.184	335.229	488.059	3982.6	1418.43	1842.37			1.94256
		evglcl|G0WVJSS01BZ9Y4	angiopoietin-related protein 2-like	35.309	22.1895	39.7477	12.1729	60.4963	2.76019			-3.14149
		evglcl|HJ4YRIA02IT8CR	annexin A7-like	10.7092	7.59196	20.0326	72.0492	24.8112	38.1177			1.57933
		evglcl|G0WVJSS02GRNA4	beta-1,3-glucan-binding protein-like	0.914091	3.31248	0	26.7852	15.1051	0.904979		3.53389
		evgTRINITY_DN91889_c3_g1_i1	C-type lectin domain family 6 member A-like	22.4042	9.25849	12.9318	46.3496	13.6492	69.6834			2.22937
		evglcl|HJ4YRIA01AGLF7	chitinase-3-like protein 1	0	0	0	1.14654	2.63885	143.711	6.81548
		evgTRINITY_BU_DN81064_c4_g2_i2	fibropellin-1-like	0	0.936136	5.70176	0	0	13.6199			2.51468
		evgTRINITY_DN93524_c10_g1_i6	fibrillin-1-like	0	3.7034	10.1809	0	28.5951	20.2625			2.47429
		evgTRINITY_DN93524_c9_g1_i3	fibrillin-1-like, transcript variant X1	226.453	197.041	269.593	274.292	348.783	378.091			0.723548
		evgTRINITY_DN92590_c9_g1_i1	hemocytin-like	50.1316	25.718	30.5661	314.226	5273.28	570.028	5.83695	6.53421	4.11324
		evglcl|G0WVJSS01EV755	FREP 14	0	6.31635	1.39899	10.8312	17.1146	2.76019		2.28155
		evgTRINITY_BU_DN82396_c7_g2_i1	FREP 7	36.4919	78.5634	92.9799	147.001	160.492	81.1043		1.14439
		evglcl|G0WVJSS02JSGF1	FREP2	0.188195	5.14361	19.6564	147.758	66.5399	37.1042	3.26327	3.56844
		evglcl|G0WVJSS02I5PGR	FREP2	4.02379	25.1831	6.95968	169.152	98.2971	71.4391	3.18148	3.43239	2.52931
		evglcl|G0WVJSS02I4ZO2	LBP/BPI3.2	24.4026	46.7965	63.7422	87.9544	218.66	198.996	1.89532		2.14463
		evgTRINITY_DN86768_c2_g1_i1	macrophage mannose receptor 1-like (Bp v1)	1098.36	1722.8	1086.32	2058.47	1943.63	2098.25	0.642475
		evgTRINITY_DN92418_c3_g2_i1	macrophage mannose receptor 1-like (Bp v2)	97.4313	111.02	64.0243	31.0542	30.7638	69.4934		-1.53537
		evglcl|G0WVJSS01CTD31	mucin-5AC-like (Bp v1)	8.49567	5.874	4.62019	52.7409	49.1827	45.9458	2.87622	2.93718	2.83414
		evgTRINITY_DN80969_c0_g1_i2	mucin-5AC-like (Bp v1)	134.524	180.15	90.1113	897.449	949.841	1011.35	2.81629	2.77172	2.92135
		evgTRINITY_GG_454Uninf_7374_c0_g2_i1	mucin-5AC-like (Bp v1)	14.1415	27.7755	6.53645	98.0049	102.756	81.2943	2.58925	2.68689	2.32417
		evglcl|G0WVJSS02JD4VW	mucin-5AC-like (Bp v1)	56.6019	49.4918	21.5021	247.848	245.549	230.263	2.49138	2.52477	2.44295
		evglcl|G0WVJSS02GE393	mucin-5AC-like (Bp v1)	12.5732	5.55509	11.6857	62.0474	54.0661	58.4345	2.49739	2.49944	2.54645
		evgTRINITY_BU_DN79997_c5_g2_i1	mucin-5AC-like (Bp v1)	76.3714	109.363	43.1688	485.243	367.323	421.892	2.47198	2.46971	2.47658
		evglcl|G0WVJSS01D03WP	mucin-5AC-like (Bp v1)	39.6196	43.0623	20.6792	194.327	148.898	164.806	2.28253	2.29895	2.27125
		evglcl|G0WVJSS01AK0WW	mucin-3A-like	5.71755	1.02872	4.74951	12.3436	21.3534	27.0136	2.27379	2.28529
		evglcl|G0WVJSS01BU4RS	mucin-5AC-like (Bp v1)	84.2397	151.222	58.781	512.285	282.842	311.313	1.96574		1.65878
		evgTRINITY_GG_16393_c4_g1_i1	mucin-22-like isoform X1	98.5426	145.05	96.8124	241.969	534.359	452.472	1.84785		2.11239
		evgTRINITY_DN90270_c16_g1_i1	mucin-22-like isoform X1	106.662	209.859	121.853	344.426	537.377	459.232	1.61163	1.58985	1.65375
		evgTRINITY_DN77996_c0_g1_i1	mucin-5AC-like (Bp v2)	9.85784	14.4021	18.8099	43.9101	31.8482	26.2444	1.21859	1.38884
		evgTRINITY_DN91861_c14_g1_i1	mucin-5AC-like (Bp v3)	138.01	192.371	177.519	69.5243	74.3124	76.9232	-1.19716	-1.22612	-1.11384
		evgTRINITY_DN82188_c0_g1_i1	mucin-2-like (Bp v1)	1.79233	3.08616	0	0	83.4119	0		4.11468
		evgTRINITY_DN78041_c0_g1_i1	mucin-5AC-like (Bp v4)	0.896167	0	1.17562	15.8564	8.34119	1.80996		3.48736
		evgTRINITY_BU_DN79585_c0_g1_i1	mucin-22-like	24.1965	1.02872	57.6054	119.533	240.378	9.95477		2.64939
		evglcl|G0WVJSS01BK20D	mucin-2-like (Bp v2)	37.639	21.6031	10.5806	53.6679	69.0044	10.8598		1.38917
		evgTRINITY_DN90607_c3_g1_i1	mucin-3A-like	40.7667	4.87614	32.3413	36.9699	54.4983	133.837			2.32956
		evgTRINITY_DN90607_c3_g1_i2	mucin-3A-like	157.833	4.38235	160.425	134.841	333.026	467.521			2.56229
		evgTRINITY_DN58911_c0_g1_i1	peptidoglycan-recognition protein SB1-like	26.885	34.9765	29.3905	56.1074	83.1844	138.462		1.18552	2.21954
		evgTRINITY_DN70758_c1_g1_i1	peptidoglycan-recognition protein SC2-like precursor	30.4607	45.7472	64.6004	87.3445	117.179	55.3123		1.11646
		evgTRINITY_DN89356_c14_g1_i1	toll-like receptor 2	137.114	63.7807	108.157	176.86	265.401	274.209	1.29529		1.45233
		evgTRINITY_DN83861_c0_g1_i1	toll-like receptor 7	56.4585	41.1488	43.498	7.31835	26.5401	26.2444	-1.21317	-1.43486
		evgTRINITY_BU_DN80833_c1_g1_i1	leucine-rich repeat and immunoglobulin-like domain-containing nogo receptor-interacting protein 2	2.6885	11.3159	13.1552	4.28124	34.6159	33.9277			1.89913
		evglcl|G0WVJSS01CNELC	toll-like receptor 3	8.96167	29.8329	19.9856	36.5918	37.9145	62.4436			1.66535
		evgTRINITY_DN105124_c0_g1_i1	toll-like receptor 3	441.174	643.506	788.501	484.792	1116.12	1888.69			1.61685
		evgTRINITY_DN97442_c0_g1_i1	toll-like receptor 4	112.917	104.93	161.06	56.1074	166.065	242.534			0.948773
	Stress response, detoxification, chaperones	evglcl|HJ4YRIA01ERORD	alpha-crystallin B chain-like (Bp v1)	173.856	182.084	233.949	356.16	341.23	296.833	0.751826	0.826462
		evgTRINITY_DN70965_c0_g2_i1	alpha-crystallin B chain-like (Bp v2)	18.8195	32.9191	24.688	17.0762	46.2557	5.42988			-2.44975
		evgTRINITY_DN89032_c5_g1_i1	putative amine oxidase [copper-containing] (Bp v1)	30.4697	5.14361	32.9174	113.434	225.212	34.3892		2.83223
		evgTRINITY_BU_DN80986_c6_g1_i1	putative amine oxidase [copper-containing] (Bp v1)	83.1554	0	89.1238	197.998	307.676	105.991		2.11188
		evgTRINITY_GG_115_c1_g1_i1	putative amine oxidase [copper-containing] (Bp v2)	60.6257	56.9809	45.9198	158.015	224.499	63.7558		1.79871
		evgTRINITY_DN46072_c1_g1_i1	putative amine oxidase [copper-containing] (Bp v2)	234.796	213.974	246.88	189.057	124.36	216.29		-0.564878
		evglcl|HJ4YRIA01DFNFT	glutathione S-transferase-like	39.3776	87.1018	44.462	262.656	497.021	239.829	2.53843	2.69999	2.7547
		evgTRINITY_DN90489_c10_g1_i1	glutathione S-transferase omega-1-like isoform X1	195.615	138.908	429.254	662.506	915.589	566.608	1.48793	1.62118
		evgTRINITY_GG_24565_c0_g1_i1	glutathione S-transferase 4-like	863.645	908.824	637.057	565.013	451.736	562.635	-0.689688	-0.661739
		evgTRINITY_DN91941_c15_g1_i4	glutathione S-transferase omega-1-like	266.413	219.365	246.716	91.0891	162.456	147.403	-0.867232	-0.941914	-0.761968
		evgTRINITY_DN99899_c0_g1_i1	probable glutathione S-transferase 7	205.24	384.371	350.194	155.283	117.497	141.955	-1.17758	-1.22314
		evglcl|G0WVJSS01B7RGI	glutathione S-transferase Mu 1-like	84.6251	115.834	65.0824	172.933	150.665	101.801		0.867562
		evgTRINITY_GG_4693_c3_g2_i1	glutathione S-transferase C-terminal domain-containing protein-like	15.665	15.6366	26.3574	5.63513	0	0		-2.59828
		evglcl|G0WVJSS01B6W10	soma ferritin	13.5949	0	12.2382	24.5775	36.2993	60.4617	2.17487	1.77254	2.77546
		evglcl|HJ4YRIA01BV90B	soma ferritin	30.407	28.1767	11.7092	57.1563	45.4367	50.3983	1.17415	1.11919
		evglcl|G0WVJSS01CAH0T	soma ferritin	1223.39	1457.21	1271.79	2117.5	1731.49	1970.57	0.558279	0.545186	0.598214
		evglcl|G0WVJSS01DZYOO	soma ferritin	10752.8	11892	10944.9	15456.6	15225.2	17647.6	0.524867		0.674334
		evglcl|G0WVJSS02IZ8A5	soma ferritin	71.2184	87.9968	68.0214	93.3944	109.527	195.186			1.38588
		evglcl|HJ4YRIA02G89W4	soma ferritin	579.865	667.836	695.638	826.327	715.234	1067.76			0.737838
		evglcl|G0WVJSS02JL0IH	soma ferritin	469.753	570.601	431.876	650.748	630.95	744.346			0.617176
		evglcl|G0WVJSS02ISPHX	universal stress protein a-like protein	122.587	113.818	157.686	147.819	197.686	256.29			0.978258
CELL AND TISSUE STRUCTURE, SHAPE, MOBILITY	Cytoskeleton, biomineralization, tissue growth	evgTRINITY_DN44130_c1_g1_i1	actin (Bp v1)	7.16934	3.08616	0	7.31835	5.30803	19.0046			2.41935
		evgTRINITY_DN44130_c0_g1_i1	actin (Bp v2)	8.06551	3.08616	1.17562	4.8789	9.09948	20.8145			2.39862
		evgTRINITY_DN95353_c0_g1_i1	collagen alpha-3(VI) chain-like (Bp v2)	4.48084	15.4308	7.05373	290.295	2101.98	5.42988	6.45539	6.82666
		evgTRINITY_DN91628_c11_g2_i2	collagen alpha-5(VI) chain-like (Bp v1)	13.4425	17.1899	4.70248	31.7129	53.8386	73.3033	2.12714	1.81782	2.63925
		evgTRINITY_DN93221_c8_g1_i1	collagen alpha-3(VI) chain-like isoform X2	7501.82	10648.3	7586.28	3570.14	2697.24	5781.91		-1.45752
		evgTRINITY_DN90834_c12_g1_i1	collagen alpha-2(IV) chain-like (Bp v1)	3300.46	5281.45	3555.08	1553.93	1245.87	1740.28	-1.41836	-1.53688
		evglcl|G0WVJSS01CY1RP	collagen alpha-3(VI) chain-like isoform X3	54.2898	49.0906	62.931	2.51263	19.0558	38.5159	-1.44867	-2.28528
		evgTRINITY_DN99669_c0_g1_i1	collagen alpha-6(VI) chain-like isoform X1	690.945	1381.57	591.337	159.784	148.625	203.62	-2.37619	-2.54348
		evgTRINITY_DN19058_c0_g1_i1	collagen alpha-5(VI) chain-like (Bp v2)	26.885	152.251	23.5124	6.09863	0.75829	6.33486	-3.81174
		evgTRINITY_DN70999_c0_g2_i1	collagen alpha-3(VI) chain-like (Bp v3)	52.9456	96.0414	45.7787	7.52571	1.51658	2.64254	-3.91289	-3.67952	-4.23682
		evgTRINITY_DN99800_c0_g1_i1	collagen alpha-6(VI) chain-like, partial [	905.129	4081.97	2306.57	208.573	201.705	63.3486	-3.94127	-3.61173
		evgTRINITY_GG_454Uninf_5710_c0_g2_i1	collagen alpha-3(VI) chain-like isoform X4	363.002	378.055	420.872	137.085	259.623	322.1		-0.963189
		evgTRINITY_BU_DN80783_c2_g2_i1	collagen alpha-3(VI) chain-like isoform X3	3.97898	0	8.22935	7.17198	15.7724	49.9277			3.54283
		evgTRINITY_DN17434_c0_g1_i1	collagen alpha-5(VI) chain-like (Bp v3)	1584.08	2073.9	2779.17	6674.34	3855.99	4391.94			1.31926
		evgTRINITY_DN89607_c14_g1_i1	collagen alpha-4(VI) chain-like	110.229	157.394	141.075	217.111	381.42	219.005			0.717638
		evgTRINITY_GG_23420_c0_g1_i1	collagen alpha-1(I) chain-like (Bp v2)	1124.87	1492.28	1588.83	570.27	578.984	996.817	-0.973511	-1.28733
		evglcl|G0WVJSS01ARP6H	collagen alpha-1(XIV) chain-like (Bp v2)	45.83	66.8669	66.5754	31.8226	11.8976	36.534	-1.14641	-1.42523
		evgTRINITY_DN71246_c1_g1_i1	collagen alpha-1(XII) chain-like, partial	23.8112	8.43551	2.19841	44.3126	62.885	0		2.17352
		evgTRINITY_DN93113_c17_g1_i1	collagen alpha-1(XIV) chain-like (Bp v1)	1408.25	1964.72	1107.43	4233.51	2990.88	2734.85	1.15217	1.26659
		evgTRINITY_DN93026_c2_g1_i1	collagen alpha-1(IV) chain-like	2688.5	4283.6	2765.97	1308.77	976.677	1386.43	-1.46794	-1.51272
		evgTRINITY_DN61598_c0_g1_i1	collagen alpha-1(V) chain-like	4954.91	9850.01	6328.37	2466.28	719.617	1996.38	-2.27576	-2.16247
		evglcl|G0WVJSS02GCKG3	collagen alpha-1(I) chain-like (Bp v1)	56.8529	252.397	39.8418	30.981	3.48813	6.7602	-3.41418
		evgTRINITY_DN85906_c0_g1_i1	tubulin alpha chain-like	52.8739	9.25849	21.1612	50.0331	2927.85	4.04526		5.47192
		evgTRINITY_DN85906_c1_g1_i1	tubulin alpha-1 chain (Bp v2)	20.6118	4.11488	2.363	7.31835	936.283	1.14027		5.38479
		evgTRINITY_DN83274_c0_g2_i1	alpha 1 type VII collagen precursor	4.92892	1.54308	1.17562	20.7353	10.6161	43.3847			3.96284
		evgTRINITY_DN18335_c0_g1_i1	collagen alpha-1(XIV) chain-like (Bp v3)	76.2997	83.7276	138.723	207.353	207.688	91.4029		1.56498
		evglcl|G0WVJSS02HSAGQ	collagen alpha-1(I) chain-like (Bp v2)	207.086	293.34	282.619	100.115	113.66	210.236		-1.28269
		evgTRINITY_DN80628_c0_g1_i1	collagen alpha-1(I) chain-like (Bp v3)	13731.9	35535.1	14015.2	4443.24	597.335	4440.95		-3.18316
		evgTRINITY_DN4988_c0_g1_i1	collagen alpha-1(XXII) chain-like	654.202	522.59	684.211	872.104	1673.55	1170.14			0.927731
		evgTRINITY_DN78423_c0_g2_i1	collagen alpha-1(XII) chain-like (Bp v3)	56.4585	42.1776	39.9711	0	37.1562	17.1946			-1.34546
		evgTRINITY_DN105071_c0_g1_i1	collagen alpha-1(XII) chain-like (Bp v2)	37.1909	88.0688	55.795	78.1478	13.8767	5.63802			-3.27226
		evgTRINITY_GG_454Uninf_498_c3_g1_i1	collagen alpha-1(I) chain-like (Bp v1)	580.206	0	0	0	0	2.38915			-6.72636
		evgTRINITY_DN89793_c1_g1_i1	kazrin-like isoform X2	467.799	520.533	529.359	317.129	423.884	342.082			-0.543977
		evglcl|G0WVJSS01BPBY8	paramyosin-like isoform X2	1778.52	2851.91	2558.69	2269.54	336.756	706.897			-1.77489
		evglcl|HJ4YRIA02IGLHX	profilin-like isoform X1	127.238	188.235	182.492	121.472	58.3959	38.8598	-1.18199		-2.6375
		evgTRINITY_DN92257_c7_g4_i1	transmembrane protein 223-like	286.774	386.038	298.608	524.482	446.633	421.72	0.51926	0.583342
		evgTRINITY_DN76901_c0_g1_i1	tubulin beta chain	8.59424	1.02872	0	8.53808	211.464	2.26245	4.35966
		evgTRINITY_GG_454Uninf_72_c2_g1_i1	tubulin alpha-1A chain-like	433.745	472.183	530.205	690.365	734.783	692.309	0.559712	0.574258	0.548635
		evgTRINITY_BU_DN80594_c0_g1_i1	tubulin alpha-1 chain (Bp v1)	214.48	229.086	180.611	148.892	106.873	128.308	-0.69865	-0.699852	-0.671857
		evgTRINITY_GG_25484_c4_g1_i1	tubulin alpha-3 chain-like	1150.21	830.847	845.753	506.796	601.839	480.2	-0.836766	-0.767374
		evgTRINITY_DN17349_c0_g1_i1	tubulin beta-1 chain	25.9889	12.3447	2.64515	14.6367	1701.13	8.14481		5.67227
		evgTRINITY_DN85906_c2_g1_i1	tubulin alpha-1D chain-like	2.49135	2.05744	0	2.43945	122.699	0		4.77439
		evgTRINITY_DN22250_c0_g1_i1	tubulin gamma-1 chain	249.135	316.846	208.085	154.905	154.691	207.24		-0.735264
		evgTRINITY_DN89238_c0_g1_i1	cytochrome b-c1 complex subunit Rieske, mitochondrial-like	334.27	436.178	406.765	634.257	1007.01	1001.81	1.16594		1.36869
		evgTRINITY_GG_454Uninf_7554_c2_g1_i1	cytochrome b5-like	24.0621	45.4283	55.2659	16.2955	16.1667	0	-1.89952
		evglcl|G0WVJSS01DHDYU	cytochrome c oxidase subunit I	182.729	0	1.17562	2.43945	0	0	-5.61727		-6.84329
		evgTRINITY_DN45158_c0_g2_i1	cytochrome c oxidase subunit XV assembly protein	0	1.02872	402.062	0	0	0	-8.24375	-7.92192	-7.93163
		evglcl|G0WVJSS02F6T6A	cytochrome c oxidase subunit 5A, mitochondrial-like	13.326	32.8574	15.8709	5.84248	0	27.7105		-2.58932
		evglcl|G0WVJSS01EY1WE	cytochrome c oxidase subunit 5A, mitochondrial-like	31.2673	42.2599	55.936	29.4564	27.6852	4.78734			-2.93554
		evglcl|HJ4YRIA01DUK57	cytochrome c oxidase subunit I	46.6455	59.851	37.6787	57.6686	8.69758	4.04526			-3.25919
	Carbohydrate metabolism	evglcl|HJ4YRIA01AGLF7	chitinase-3-like protein 1	0	0	0	1.14654	2.63885	143.711	6.81548
		evgTRINITY_DN92909_c10_g1_i1utrorf	chitinase domain-containing protein 1-like	343.232	285.985	224.544	131.73	169.857	218.1		-0.915966
		evgTRINITY_DN102324_c0_g1_i1	acidic mammalian chitinase-like	115.606	6.17233	15.2831	9.7578	139.525	355.657			2.87763
		evgTRINITY_DN80537_c0_g3_i1	chitinase-like protein PB1E7.04c	141.03	66.548	97.3649	9.68462	127.772	5.23983			-4.15999
	Cholesterol homeostasis, lipid metabolism	evgTRINITY_DN40950_c0_g1_i1	long-chain-fatty-acid--CoA ligase 5-like	407.756	362.11	326.282	134.17	237.345	193.666	-0.954132	-0.974983	-0.896238
		evglcl|G0WVJSS01AV0ND	low-density lipoprotein receptor-related protein 8-like	2.07015	0	4.36155	5.64733	12.4435	13.1584	2.68914
	Metabolic	evgTRINITY_DN102590_c0_g1_i1	aldehyde dehydrogenase, mitochondrial-like	647.033	969.055	715.953	426.904	421.609	528.155		-0.874738
		evglcl|G0WVJSS02I7Y7L	arginase-1-like isoform X2	1.59518	1.4505	0	9.61144	33.9031	5.30318	3.51734
		evglcl|G0WVJSS01DLWKN	arginase-1-like isoform X3	8.19097	2.45864	3.63267	51.509	42.8434	13.1132	2.85328	3.22468
		evglcl|G0WVJSS02GC6A6	arginase-1-like isoform X3	10.4403	7.05703	8.57028	78.1966	40.5837	26.8417	2.4234	2.6885
		evgTRINITY_DN91405_c14_g1_i1	arginase-1-like isoform X2	122.085	112.285	357.189	2649.23	2561.06	567.784		3.72887
		evglcl|HJ4YRIA01BPE6I	arginase-1-like isoform X2	3.58467	2.05744	1.17562	37.7383	15.9241	4.5249		3.29114
		evgTRINITY_GG_24589_c0_g1_i1	arginase-1-like isoform X2	103.158	14.6078	56.1947	352.415	561.893	87.05		2.94873
		evglcl|G0WVJSS02GOWYP	arginase-1-like isoform X2	6.27317	1.02872	3.52686	25.6142	15.1658	4.5249		2.36686
		evgTRINITY_DN47504_c1_g1_i1	argininosuccinate synthase-like	996.538	290.099	1672.91	2236.98	4939.5	3671.5	1.87355		1.84656
		evgTRINITY_DN34178_c0_g1_i1	surfeit locus protein 2-like	299.32	445.395	281.596	614.742	557.214	562.617	0.756346	0.774689
	Transport	evglcl|G0WVJSS01BZO4L	ADP,ATP carrier -like	861.683	723.037	857.592	1168.86	950.486	1157.98			0.522952
		evglcl|G0WVJSS01DXZ44	neuroglobin-like	128.331	72.0413	58.5694	0	23.5146	11.4208	-2.8433	-2.82342	-2.893
		evglcl|G0WVJSS02H1ED4	hemoglobin, partial	311.382	515.739	537.071	177.446	193.857	374.164		-1.29365
		evgTRINITY_DN93288_c6_g1_i1	proton myo-inositol cotransporter-like	370.888	481.442	384.099	883.081	471.922	657.92			0.699214
IMMUNITY, STRESS, DEFENSE	Cell adhesion	evgTRINITY_DN89350_c16_g1_i1	protocadherin Fat 4-like	112.917	49.3786	125.791	247.604	316.965	325.793	1.62339	1.54696	1.752
		evgTRINITY_DN86761_c0_g2_i1	protocadherin Fat 3-like	7.16934	0	11.7562	19.5156	28.0567	1.80996		1.85163
		evgTRINITY_DN86761_c1_g2_i1	protocadherin Fat 3-like	18.8195	8.22977	27.0393	69.5243	53.0803	5.42988		1.74217
		evgTRINITY_DN41702_c0_g1_i1	protocadherin-23-like	552.935	686.157	315.066	357.38	3705	1503.17			1.53884
		evgTRINITY_DN70127_c0_g1_i1	cadherin-related tumor suppressor-like	874.659	642.951	717.129	274.438	387.486	285.068	-1.23752	-1.17595	-1.37928
		evgTRINITY_DN93250_c6_g1_i1	carbonyl reductase [NADPH] 1-like (Bp v1)	362.688	578.347	442.986	1027.95	1145.27	942.844	1.17846	1.23586	1.39677
		evgTRINITY_DN72929_c1_g1_i1	carbonyl reductase [NADPH] 1-like (Bp v2)	50.1854	71.3727	71.5483	135.121	124.67	100.86	0.896637
		evgTRINITY_DN87865_c0_g2_i1	carbonyl reductase	0	1.02872	349.159	0	0	0	-8.41489	-7.71939	-7.72711
		evglcl|G0WVJSS02HLSFU	caveolin-1-like (Bp v1)	72.3117	168.114	130.611	336.73	240.598	93.9731		1.21395
		evgTRINITY_DN99929_c0_g1_i1	caveolin-1-like (Bp v2)	1296.75	1327.05	1397.81	2002.79	439.05	590.952			-1.16238
		evgTRINITY_GG_9019_c0_g1_i1	dermatopontin 2	0.896167	2.04716	15.7533	359.782	26.343	37.7286	4.47857
		evgTRINITY_DN93533_c21_g1_i1	dermatopontin 2	0	6.17233	9.40497	241.554	24.0075	31.3394		4.36546	2.55119
		evglcl|G0WVJSS01ANSJ0	dermatopontin 2	0	2.06773	5.61947	78.5381	16.7885	13.4208	3.69785	3.87353
		evgTRINITY_GG_22084_c2_g1_i1	dermatopontin 3	0	2.28376	13.8723	400.497	31.8103	70.4164	4.84896	4.99942	3.63722
		evgTRINITY_DN102466_c0_g1_i1	dermatopontin-like isoform X1	1568.47	1225.16	1207.4	6249.3	7314.17	10226.7	2.57152	2.34385	2.95486
		evglcl|HJ4YRIA01DF23H	dermatopontin-like isoform X1	214.901	167.733	170.43	614.095	492.418	856.581	1.82512	1.58317	2.23172
		evglcl|HJ4YRIA01D6341	dermatopontin-like (Bp v1)	561.431	1085.8	573.915	268.437	186.092	209.729	-1.73946	-1.71581
		evgTRINITY_GG_24027_c0_g1_i1	dermatopontin-like (Bp v2)	110.049	203.111	93.4619	52.5702	14.6198	32.8417	-2.88417	-2.11515
		evgTRINITY_DN85078_c0_g1_i1	dermatopontin-like (Bp v2)	312.198	589.653	320.204	125.888	81.8725	84.0364	-2.61265	-1.97869
		evgTRINITY_DN97367_c0_g1_i1	dermatopontin-like (Bp v3)	299.32	460.106	162.236	42.6904	41.7059	83.2581	-2.4494	-2.86791
		evgTRINITY_DN102517_c0_g1_i1	mammalian ependymin-related protein 1-like (Bp v1)	1.79233	4.44408	6.40713	56.9246	82.1759	4.5249		3.99128
		evgTRINITY_GG_454Uninf_12265_c0_g1_i1	mammalian ependymin-related protein 1-like (Bp v2)	10.8347	19.6897	3.82077	67.8045	103.992	2.42534		2.85281
		evglcl|HJ4YRIA01D9WCK	mammalian ependymin-related protein 1-like (Bp v3)	2.93943	16.5624	3.87955	32.9326	36.0036	0		2.95645
		evgTRINITY_GG_8561_c37_g1_i1	ficolin-2-like (Bp v1)	4.3016	0	2.39827	2.37846	116.997	156.706	5.19772	4.25944	5.95224
		evgTRINITY_DN23074_c0_g1_i1	ficolin-2-like (Bp v2)	48.393	6.17233	8.19408	41.4707	875.825	1221.72	5.61523	4.22354	5.85956
		evgTRINITY_DN94795_c0_g1_i1	ficolin-1-like	133.529	442.35	457.317	1219.73	1685.68	1907.7	2.2184	2.68315	2.46485
		evglcl|G0WVJSS01CV8ZS	ficolin-1-like, partial	0.224042	9.7317	9.24038	20.1011	25.0539	29.3485	1.88516	1.76826	2.16355
		evgTRINITY_DN93021_c10_g1_i1	ficolin-2-like (Bp v3)	5.377	0	1.17562	1.21973	139.048	0.904979		4.56177
		evgTRINITY_DN90820_c12_g1_i1	ficolin-2-like isoform X1	28.8207	7.20105	5.83108	22.016	326.83	487.63			5.11157
		evglcl|G0WVJSS01BX361	galectin-4-like	31.6257	34.4107	37.3377	83.5878	67.0404	54.9956	0.982966
		evgTRINITY_DN91788_c11_g1_i1	galectin-4-like	649.551	751.111	885.489	1386.84	1603.08	1385.75	0.936183	0.971511	0.874673
		evgTRINITY_DN74702_c1_g1_i1	galectin-6-like	102.163	113.159	81.1178	65.8652	30.3316	52.4888	-0.989675	-1.31842	-0.875541
		evglcl|G0WVJSS02HYCA4	galectin-4-like	18.1832	14.4741	32.9762	45.3494	52.1552	18.6788		1.14715
	Cellular defense	evgTRINITY_GG_12842_c9_g1_i1	ADAM family mig-17-like (Bp v1)	35.8467	163.567	50.5517	241.506	207.771	197.286	1.36636
		evgTRINITY_DN85819_c3_g1_i1	ADAM family mig-17-like (Bp v2)	1498.39	1093.53	898.962	3296.92	2435.88	2953.82	1.31487	1.29339	1.34799
		evglcl|G0WVJSS01CIWKB	allograft inflammatory factor 1-like	31.6168	46.169	65.5291	12.6607	30.9685	125.023			1.39364
		evgTRINITY_DN97358_c0_g1_i1	aplysianin-A-like,	1135.95	1708.63	1196.62	2770.98	2715.94	1384.96		1.25536
		evgTRINITY_GG_9443_c0_g1_i1	GTPase IMAP family member 1-like	32.8893	17.7866	25.8049	55.156	67.5181	81.6563	1.42173	1.25759	1.69289
		evgTRINITY_DN91832_c20_g1_i1	GTPase IMAP family member 7-like (Bp v1)	234.796	243.807	213.763	351.281	400.377	294.118	0.594294	0.736222
		evgTRINITY_GG_13931_c1_g1_i1	GTPase IMAP family member 7-like (Bp v2)	103.122	159.071	98.5641	58.62	49.7666	48.3259	-1.19634	-1.14226
		evgTRINITY_BU_DN81665_c0_g1_i1	GTPase IMAP family member 8-like	0.896167	0	141.263	0	0.75829	0	-6.99613		-6.42623
		evgTRINITY_GG_11960_c3_g1_i1	GTPase IMAP family member 4-like	26.0157	24.8951	63.6011	86.5517	78.4754	37.3123		1.12666
		evgTRINITY_DN90760_c10_g1_i1	GTPase IMAP family member 4-like	11.7219	20.9962	32.9879	44.5322	46.0433	0		1.47693
		evglcl|G0WVJSS01A8VOM	late histone H1-like	234.428	255.936	223.873	111.08	166.634	175.72	-0.653964	-0.773355
		evglcl|G0WVJSS02IO01E	histone H1, gonadal-like	506.397	689.233	419.379	284.781	237.17	333.575	-0.915635	-1.46859
		evglcl|G0WVJSS02I38HS	Histone H3.3 (Bp v2)	139.193	181.127	154.394	226.649	256.044	159.738		0.695748
		evglcl|G0WVJSS02HF2FK	histone H2A.V	352.14	453.923	318.852	236.175	234.478	302.716		-0.67192
		evglcl|HJ4YRIA01DKT6E	late histone H1-like	115.202	114.281	101.903	41.0072	69.3835	99.8826		-0.988717
		evglcl|G0WVJSS02HF2FK	histone H2A.V	352.14	453.923	318.852	236.175	234.478	302.716		-0.67192
		evgTRINITY_DN91623_c14_g2_i1	macrophage-expressed gene 1 protein-like isoform X2	6158.5	5465.52	7178.75	3889.95	7872.5	10563.8			0.764298
		evgTRINITY_GG_16068_c11_g1_i1	multidrug resistance-associated protein 1-like isoform X2	0	21.6031	36.4442	37.8115	0	178.281			3.17717
		evgTRINITY_DN92637_c6_g1_i1	multidrug resistance-associated protein 1-like	49.2892	37.034	43.498	39.0312	188.814	338.462			2.97739
		evgTRINITY_BU_DN82182_c2_g2_i1	multidrug resistance-associated protein 1-like isoform X1	39.1804	34.4416	18.4808	0	7.93929	21.0408		-2.75668
		evgTRINITY_DN91832_c11_g1_i3	multidrug resistance-associated protein 4-like	327.101	277.6	258.637	146.367	267.676	170.136			-0.739228
		evgTRINITY_DN91832_c11_g1_i3	multidrug resistance-associated protein 4-like	327.101	277.6	258.637	146.367	267.676	170.136			-0.739228
		evgTRINITY_BU_DN77885_c1_g1_i1	multiple epidermal growth factor-like domains protein 10, transcript variant X5	0	0.514361	0.58781	0	53.0348	1.80996		4.82727
		evgTRINITY_GG_19531_c1_g1_i2	multiple epidermal growth factor-like domains protein 10 (Bp v1)	23.4975	43.8852	55.1954	26.6266	41.2585	165.258			2.19271
		evgTRINITY_DN90923_c14_g1_i1	multiple epidermal growth factor-like domains protein 6	20.0831	50.8806	39.207	50.8503	32.7202	142.534			1.95967
		evgTRINITY_DN90923_c15_g1_i1	multiple epidermal growth factor-like domains protein 10 (Bp v2)	23.372	77.5244	59.8274	94.858	33.8576	206.724			1.93799
		evgTRINITY_GG_454Uninf_4858_c0_g1_i1	multiple epidermal growth factor-like domains protein 6	17.6186	59.5835	64.6474	55.1682	33.1903	171.964			1.84487
		evgTRINITY_GG_2835_c2_g1_i1	multiple epidermal growth factor-like domains protein 6	10.6196	33.1865	19.7152	32.091	10.9421	71.5296			1.74986
		evgTRINITY_GG_454Uninf_2199_c0_g2_i1	multiple epidermal growth factor-like domains protein 10 (Bp v1)	14.5538	24.8128	43.3569	16.2833	16.6445	92.6427			1.73415
		evglcl|G0WVJSS01ERHRC	multiple epidermal growth factor-like domains protein 10 (Bp v3)	2.24042	6.30606	12.8143	4.46419	8.25019	24.0544			1.7325
		evgTRINITY_GG_19531_c1_g1_i1	multiple epidermal growth factor-like domains protein 10 (Bp v1)	24.9672	48.3087	69.4792	31.1518	27.4577	144.389			1.58966
		evgTRINITY_DN93193_c17_g1_i1	multiple epidermal growth factor-like domains protein 11, partial	61.719	131.738	170.677	158.955	133.429	361.005			1.55766
		evgTRINITY_GG_15582_c1_g1_i2	multiple epidermal growth factor-like domains protein 10 (Bp v3)	101.482	158.084	286.863	179.836	191.612	507.322			1.44828
		evglcl|G0WVJSS02IC8M5	multiple epidermal growth factor-like domains protein 11	46.6007	34.9765	74.0641	25.6142	67.4878	118.552			1.18679
		evgTRINITY_DN89410_c9_g1_i1	multiple epidermal growth factor-like domains protein 10 (Bp v3)	76.3086	122.058	145.401	64.5479	147.957	232.408			1.27643
		evgTRINITY_GG_16229_c0_g1_i1	multiple epidermal growth factor-like domains protein 10 (Bp v3)	197.067	324.695	253.276	165.187	257.508	519.431			1.15624
		evgTRINITY_DN92495_c12_g1_i2	multiple epidermal growth factor-like domains protein 10 (Bp v4)	955.314	675.87	882.891	557.414	1710.7	1541.18			0.887265
		evgTRINITY_DN68979_c0_g1_i1	Vacuolar sorting-associated 28 homolog; vacuolar protein sorting-associated protein 28 homolog	0.896167	0	322.12	0	0	0	-7.92543	-7.63279	-7.61856
		evgTRINITY_DN61848_c1_g1_i1	zinc carboxypeptidase A 1-like	57.3547	37.9392	24.688	268.34	13501.1	10.8598		7.15862
	Metal binding and transport	evgTRINITY_DN93642_c0_g1_i1	CDK5RAP1-like protein	588.782	648.177	778.261	1186.79	1065.4	1049.78	0.712163	0.744568	0.656519
		evgTRINITY_DN92914_c13_g1_i1	cytochrome P450 18a1-like	0	0.514361	0.387955	12.9779	24.5003	49.7015	5.36574	4.69752	6.34176
		evgTRINITY_GG_7613_c2_g1_i1	cytochrome P450 18a1-like	11.6502	8.22977	4.70248	32.9326	33.7363	77.1314	2.48544		3.21415
		evgTRINITY_DN92350_c7_g1_i2	cytochrome P450 3A24-like (Bp v1)	137.158	150.378	116.116	45.7153	86.3009	75.0861	-0.958268	-1.18485	-0.885891
		evgTRINITY_DN91183_c9_g1_i1	cytochrome P450 4F6-like isoform X2	128.018	88.47	146.953	54.8876	67.4878	54.9051	-1.31533	-0.978218
		evgTRINITY_DN91076_c26_g1_i1	cytochrome P450 10-like	56.4585	38.0627	30.5661	17.0762	9.85777	20.8145	-1.36496	-1.58586
		evgTRINITY_DN93348_c10_g1_i5	cytochrome P450 2J1-like	38.2843	94.1691	45.8375	5.37899	13.2473	6.75115	-2.74945	-2.68233
		evgTRINITY_DN92011_c14_g1_i1	cytochrome p450	250.031	301.199	376.199	1783.06	965.189	578.155		2.12567	0.911883
		evgTRINITY_DN76333_c0_g1_i1	cytochrome P450 26A1-like	130.84	88.47	108.157	25.6142	53.8386	83.2581		-1.44397
		evgTRINITY_BU_DN82356_c9_g1_i7	cytochrome P450 2J1-like	110.202	267.529	24.4999	3.43963	5.08054	15.3485		-4.86125
		evgTRINITY_GG_454Uninf_399_c0_g1_i1	cytochrome P450 18a1-like	2.6885	5.14361	2.35124	17.6372	19.488	65.1766			4.17175
		evgTRINITY_DN92655_c17_g1_i1	cytochrome P450 2E1-like	1325.23	1489.2	1293.37	801.811	3599.99	4987.28			1.88315
		evgTRINITY_GG_454Uninf_399_c1_g2_i1	cytochrome P450 2E1-like	115.812	143.383	92.686	92.2478	216.469	367.449			1.66415
		evgTRINITY_DN90506_c11_g1_i1	cytochrome P450 3A24-like (Bp v2)	595.055	453.666	480.829	524.482	940.279	974.663			0.947778
		evgTRINITY_DN91548_c20_g1_i1	cytochrome P450 2U1-like (Bp v1)	92.3052	24.6893	29.3905	252.483	192.606	131.222	1.96732	2.16838
		evgTRINITY_DN82707_c1_g1_i1	dihydropyrimidinase-like	520.673	408.402	308.013	204.914	157.724	251.584	-1.85416	-1.18864
		evgTRINITY_DN93675_c0_g1_i1	DBH-like monooxygenase protein 1	13.2095	15.4823	52.9029	168.127	991.047	110.091	3.93749	4.23454	1.9615
		evgTRINITY_GG_454Inf_483_c0_g1_i1	DBH-like monooxygenase protein 1	8.29851	14.3507	0	62.4011	40.9856	69.0952	2.85745	2.75959	3.17539
		evgTRINITY_DN90222_c9_g1_i1	DBH-like monooxygenase protein 1 homolog	131.737	34.9765	106.982	258.582	426.811	444.345	2.43568	1.88676	2.26692
		evgTRINITY_DN73816_c0_g1_i1	DBH-like monooxygenase protein 1 isoform X2	125.463	111.102	72.8885	223.137	255.544	180.996	1.88742	1.21852
	Oxidative/antioxidative response	evgTRINITY_DN69852_c1_g1_i1	chorion peroxidase-like	244.654	111.102	28.2149	78.0624	442.083	897.74			2.78416
		evgTRINITY_GG_7798_c0_g1_i1	dual oxidase 2-like	54.7469	93.1713	119.337	55.034	80.6138	198.218			1.14836
		evgTRINITY_DN85529_c2_g1_i1	dual oxidase 2-like	63.6279	149.165	130.494	101.237	148.625	287.783			1.32297
		evgTRINITY_DN91274_c9_g1_i1	dual oxidase 1-like	581.613	545.222	402.062	507.406	1898.66	946.608			0.954768
		evgTRINITY_DN93488_c9_g1_i1	peroxidasin homolog	3106.12	3533.66	3545.67	1583.2	2084.78	2466.97	-0.731259	-0.887916
		evgTRINITY_DN81450_c2_g1_i1	peroxiredoxin-5, mitochondrial-like	120.086	119.332	83.4691	58.5468	74.3124	68.7784	-0.6757
		evglcl|G0WVJSS01C7GCM	peroxiredoxin-2-like	33.3285	50.7777	58.8751	65.8652	70.6423	89.6382			0.925226
		evglcl|G0WVJSS02I6J60	peroxiredoxin 1-like	232.564	286.91	253.511	301.443	372.472	365.322			0.523452
		evgTRINITY_DN103351_c0_g1_i1	monomeric sarcosine oxidase-like	102.163	4.11488	31.7418	97.578	141.8	301.358			2.6397
		evgTRINITY_DN93655_c0_g1_i1	peroxisomal sarcosine oxidase-like	643.448	631.635	507.868	1067.26	726.441	963.803			0.713749
		evgTRINITY_DN95024_c0_g1_i1	thioredoxin domain-containing 12	0	0	0	2.43945	128.257	0.904979	6.63862
		evgTRINITY_GG_454Uninf_4801_c1_g6_i1	thioredoxin domain-containing 12	0	0	0	0	121.683	2.96833	6.56113
		evglcl|G0WVJSS01B0VVX	thioredoxin domain-containing 12-like isoform X2	0	0	0	2.43945	97.789	0	6.25243
		evgTRINITY_DN102363_c0_g1_i1	thioredoxin-2 isoform X2	0.896167	1.02872	0	0	95.5445	0	4.89364	5.23327
		evglcl|G0WVJSS01EN4ZA	thioredoxin 4B	77.9666	103.901	103.455	137.829	160.757	142.987	0.627684	0.65119
		evglcl|G0WVJSS02HI8N6	thioredoxin domain-containing 12-like isoform X2	1.79233	1.19332	0	2.6834	292.275	2.02715		6.43637
		evgTRINITY_DN744_c0_g1_i1	thioredoxin domain-containing 12-like isoform X2	19.5364	9.0939	2.23368	17.7836	2034.15	7.49323		6.32224
		evglcl|G0WVJSS02HCZFC	thioredoxin, mitochondrial-like	14.1236	12.6533	0	10.6482	39.105	36.6607			1.99959
	Pattern recognition, carbohydrate binding, adhesion	evglcl|G0WVJSS02HVR9U	Angiopoietin-1 receptor	102.405	38.3919	71.0545	941.652	354.326	566.381	3.12798		3.55358
		evglcl|G0WVJSS01CV8ZS	angiopoietin-related 2-like (Bp v1)	0.224042	9.7317	9.24038	20.1011	25.0539	29.3485	1.88516	1.76826	2.16355
		evgTRINITY_GG_454Uninf_1208_c2_g8_i1	angiopoietin-related 2-like (Bp v1)	28.0769	26.1089	58.3343	90.406	122.684	78.2807	1.36226	1.49339
		evglcl|G0WVJSS01A3KFN	angiopoietin-related 2-like (Bp v2)	15.4051	38.8342	31.6595	82.3924	73.228	49.4028	1.2422	1.43391
		evgTRINITY_GG_454Uninf_7855_c3_g2_i1	angiopoietin-related 2-like (Bp v2)	63.2336	152.518	185.149	317.763	264.946	276.933	1.97936	1.11826
		evglcl|G0WVJSS02HGVD1	angiopoietin-related 2-like (Bp v2)	71.5142	55.1806	62.7546	102.555	124.761	108.444		0.84627
		evglcl|G0WVJSS02IZ21L	angiopoietin-related 2-like (Bp v1)	6.3359	11.8817	17.9047	3.20788	0	2.24435	-2.46449	-2.48118
		evgTRINITY_DN95055_c0_g1_i1	fibrinogen C domain-containing protein 1-like	22.4042	5.14361	1.17562	14.6367	528.528	6.33486		4.52646
		evglcl|G0WVJSS01A8299	angiopoietin-related protein 2-like	24.4474	25.2448	36.5971	49.1793	60.6404	42.1901	0.873823
		evglcl|HJ4YRIA02IW63O	Angiopoietin-1 receptor	2356.36	1111.57	1780.14	26097.1	7804.21	11698.6			2.74741
		evglcl|HJ4YRIA01B3DMZ	Angiopoietin-1 receptor	620.184	335.229	488.059	3982.6	1418.43	1842.37			1.94256
		evglcl|G0WVJSS01BZ9Y4	angiopoietin-related protein 2-like	35.309	22.1895	39.7477	12.1729	60.4963	2.76019			-3.14149
		evglcl|HJ4YRIA02IT8CR	annexin A7-like	10.7092	7.59196	20.0326	72.0492	24.8112	38.1177			1.57933
		evglcl|G0WVJSS02GRNA4	beta-1,3-glucan-binding protein-like	0.914091	3.31248	0	26.7852	15.1051	0.904979		3.53389
		evgTRINITY_DN91889_c3_g1_i1	C-type lectin domain family 6 member A-like	22.4042	9.25849	12.9318	46.3496	13.6492	69.6834			2.22937
		evglcl|HJ4YRIA01AGLF7	chitinase-3-like protein 1	0	0	0	1.14654	2.63885	143.711	6.81548
		evgTRINITY_BU_DN81064_c4_g2_i2	fibropellin-1-like	0	0.936136	5.70176	0	0	13.6199			2.51468
		evgTRINITY_DN93524_c10_g1_i6	fibrillin-1-like	0	3.7034	10.1809	0	28.5951	20.2625			2.47429
		evgTRINITY_DN93524_c9_g1_i3	fibrillin-1-like, transcript variant X1	226.453	197.041	269.593	274.292	348.783	378.091			0.723548
		evglcl|G0WVJSS01EV755	FREP 14	0	6.31635	1.39899	10.8312	17.1146	2.76019		2.28155
		evgTRINITY_BU_DN82396_c7_g2_i1	FREP 7	36.4919	78.5634	92.9799	147.001	160.492	81.1043		1.14439
		evglcl|G0WVJSS02JSGF1	FREP2	0.188195	5.14361	19.6564	147.758	66.5399	37.1042	3.26327	3.56844
		evglcl|G0WVJSS02I5PGR	FREP2	4.02379	25.1831	6.95968	169.152	98.2971	71.4391	3.18148	3.43239	2.52931
		evglcl|G0WVJSS02I4ZO2	LBP/BPI3.2	24.4026	46.7965	63.7422	87.9544	218.66	198.996	1.89532		2.14463
		evgTRINITY_DN86768_c2_g1_i1	macrophage mannose receptor 1-like (Bp v1)	1098.36	1722.8	1086.32	2058.47	1943.63	2098.25	0.642475
		evgTRINITY_DN92418_c3_g2_i1	macrophage mannose receptor 1-like (Bp v2)	97.4313	111.02	64.0243	31.0542	30.7638	69.4934		-1.53537
		evglcl|G0WVJSS01CTD31	mucin-5AC-like (Bp v1)	8.49567	5.874	4.62019	52.7409	49.1827	45.9458	2.87622	2.93718	2.83414
		evgTRINITY_DN80969_c0_g1_i2	mucin-5AC-like (Bp v1)	134.524	180.15	90.1113	897.449	949.841	1011.35	2.81629	2.77172	2.92135
		evgTRINITY_GG_454Uninf_7374_c0_g2_i1	mucin-5AC-like (Bp v1)	14.1415	27.7755	6.53645	98.0049	102.756	81.2943	2.58925	2.68689	2.32417
		evglcl|G0WVJSS02JD4VW	mucin-5AC-like (Bp v1)	56.6019	49.4918	21.5021	247.848	245.549	230.263	2.49138	2.52477	2.44295
		evglcl|G0WVJSS02GE393	mucin-5AC-like (Bp v1)	12.5732	5.55509	11.6857	62.0474	54.0661	58.4345	2.49739	2.49944	2.54645
		evgTRINITY_BU_DN79997_c5_g2_i1	mucin-5AC-like (Bp v1)	76.3714	109.363	43.1688	485.243	367.323	421.892	2.47198	2.46971	2.47658
		evglcl|G0WVJSS01D03WP	mucin-5AC-like (Bp v1)	39.6196	43.0623	20.6792	194.327	148.898	164.806	2.28253	2.29895	2.27125
		evglcl|G0WVJSS01AK0WW	mucin-3A-like	5.71755	1.02872	4.74951	12.3436	21.3534	27.0136	2.27379	2.28529
		evglcl|G0WVJSS01BU4RS	mucin-5AC-like (Bp v1)	84.2397	151.222	58.781	512.285	282.842	311.313	1.96574		1.65878
		evgTRINITY_GG_16393_c4_g1_i1	mucin-22-like isoform X1	98.5426	145.05	96.8124	241.969	534.359	452.472	1.84785		2.11239
		evgTRINITY_DN90270_c16_g1_i1	mucin-22-like isoform X1	106.662	209.859	121.853	344.426	537.377	459.232	1.61163	1.58985	1.65375
		evgTRINITY_DN77996_c0_g1_i1	mucin-5AC-like (Bp v2)	9.85784	14.4021	18.8099	43.9101	31.8482	26.2444	1.21859	1.38884
		evgTRINITY_DN91861_c14_g1_i1	mucin-5AC-like (Bp v3)	138.01	192.371	177.519	69.5243	74.3124	76.9232	-1.19716	-1.22612	-1.11384
		evgTRINITY_DN82188_c0_g1_i1	mucin-2-like (Bp v1)	1.79233	3.08616	0	0	83.4119	0		4.11468
		evgTRINITY_DN78041_c0_g1_i1	mucin-5AC-like (Bp v4)	0.896167	0	1.17562	15.8564	8.34119	1.80996		3.48736
		evgTRINITY_BU_DN79585_c0_g1_i1	mucin-22-like	24.1965	1.02872	57.6054	119.533	240.378	9.95477		2.64939
		evglcl|G0WVJSS01BK20D	mucin-2-like (Bp v2)	37.639	21.6031	10.5806	53.6679	69.0044	10.8598		1.38917
		evgTRINITY_DN90607_c3_g1_i1	mucin-3A-like	40.7667	4.87614	32.3413	36.9699	54.4983	133.837			2.32956
		evgTRINITY_DN90607_c3_g1_i2	mucin-3A-like	157.833	4.38235	160.425	134.841	333.026	467.521			2.56229
		evgTRINITY_DN58911_c0_g1_i1	peptidoglycan-recognition protein SB1-like	26.885	34.9765	29.3905	56.1074	83.1844	138.462		1.18552	2.21954
		evgTRINITY_DN70758_c1_g1_i1	peptidoglycan-recognition protein SC2-like precursor	30.4607	45.7472	64.6004	87.3445	117.179	55.3123		1.11646
		evgTRINITY_DN70758_c1_g1_i1	peptidoglycan-recognition protein SC2-like precursor	30.4607	45.7472	64.6004	87.3445	117.179	55.3123		1.11646
		evgTRINITY_DN89356_c14_g1_i1	toll-like receptor 2	137.114	63.7807	108.157	176.86	265.401	274.209	1.29529		1.45233
		evgTRINITY_DN83861_c0_g1_i1	toll-like receptor 7	56.4585	41.1488	43.498	7.31835	26.5401	26.2444	-1.21317	-1.43486
		evgTRINITY_BU_DN80833_c1_g1_i1	leucine-rich repeat and immunoglobulin-like domain-containing nogo receptor-interacting protein 2	2.6885	11.3159	13.1552	4.28124	34.6159	33.9277			1.89913
		evglcl|G0WVJSS01CNELC	toll-like receptor 3	8.96167	29.8329	19.9856	36.5918	37.9145	62.4436			1.66535
		evgTRINITY_DN105124_c0_g1_i1	toll-like receptor 3	441.174	643.506	788.501	484.792	1116.12	1888.69			1.61685
		evgTRINITY_DN97442_c0_g1_i1	toll-like receptor 4	112.917	104.93	161.06	56.1074	166.065	242.534			0.948773
	Stress response, detoxification, chaperones	evglcl|HJ4YRIA01ERORD	alpha-crystallin B chain-like (Bp v1)	173.856	182.084	233.949	356.16	341.23	296.833	0.751826	0.826462
		evgTRINITY_DN70965_c0_g2_i1	alpha-crystallin B chain-like (Bp v2)	18.8195	32.9191	24.688	17.0762	46.2557	5.42988			-2.44975
		evgTRINITY_DN89032_c5_g1_i1	putative amine oxidase [copper-containing] (Bp v1)	30.4697	5.14361	32.9174	113.434	225.212	34.3892		2.83223
		evgTRINITY_BU_DN80986_c6_g1_i1	putative amine oxidase [copper-containing] (Bp v1)	83.1554	0	89.1238	197.998	307.676	105.991		2.11188
		evgTRINITY_GG_115_c1_g1_i1	putative amine oxidase [copper-containing] (Bp v2)	60.6257	56.9809	45.9198	158.015	224.499	63.7558		1.79871
		evgTRINITY_DN46072_c1_g1_i1	putative amine oxidase [copper-containing] (Bp v2)	234.796	213.974	246.88	189.057	124.36	216.29		-0.564878
		evglcl|HJ4YRIA01DFNFT	glutathione S-transferase-like	39.3776	87.1018	44.462	262.656	497.021	239.829	2.53843	2.69999	2.7547
		evgTRINITY_DN90489_c10_g1_i1	glutathione S-transferase omega-1-like isoform X1	195.615	138.908	429.254	662.506	915.589	566.608	1.48793	1.62118
		evgTRINITY_GG_24565_c0_g1_i1	glutathione S-transferase 4-like	863.645	908.824	637.057	565.013	451.736	562.635	-0.689688	-0.661739
		evgTRINITY_DN91941_c15_g1_i4	glutathione S-transferase omega-1-like	266.413	219.365	246.716	91.0891	162.456	147.403	-0.867232	-0.941914	-0.761968
		evgTRINITY_DN99899_c0_g1_i1	probable glutathione S-transferase 7	205.24	384.371	350.194	155.283	117.497	141.955	-1.17758	-1.22314
		evglcl|G0WVJSS01B7RGI	glutathione S-transferase Mu 1-like	84.6251	115.834	65.0824	172.933	150.665	101.801		0.867562
		evgTRINITY_GG_4693_c3_g2_i1	glutathione S-transferase C-terminal domain-containing protein-like	15.665	15.6366	26.3574	5.63513	0	0		-2.59828
		evglcl|G0WVJSS01B6W10	soma ferritin	13.5949	0	12.2382	24.5775	36.2993	60.4617	2.17487	1.77254	2.77546
		evglcl|HJ4YRIA01BV90B	soma ferritin	30.407	28.1767	11.7092	57.1563	45.4367	50.3983	1.17415	1.11919
		evglcl|G0WVJSS01CAH0T	soma ferritin	1223.39	1457.21	1271.79	2117.5	1731.49	1970.57	0.558279	0.545186	0.598214
		evglcl|G0WVJSS01DZYOO	soma ferritin	10752.8	11892	10944.9	15456.6	15225.2	17647.6	0.524867		0.674334
		evglcl|G0WVJSS02IZ8A5	soma ferritin	71.2184	87.9968	68.0214	93.3944	109.527	195.186			1.38588
		evglcl|HJ4YRIA02G89W4	soma ferritin	579.865	667.836	695.638	826.327	715.234	1067.76			0.737838
		evglcl|G0WVJSS02JL0IH	soma ferritin	469.753	570.601	431.876	650.748	630.95	744.346			0.617176
		evglcl|G0WVJSS02ISPHX	universal stress protein a-like protein	122.587	113.818	157.686	147.819	197.686	256.29			0.978258
TRANSCRIPTION/TRANSLATION REGULATION, CELL SIGNALING	Apoptosis	evgTRINITY_DN102327_c0_g1_i1	glyceraldehyde-3-phosphate dehydrogenase-like	2.6885	2.05744	0	1.21973	95.3018	0		4.3563
		evglcl|G0WVJSS01AZ3NS	mucin-19	293.943	354.909	272.744	685.486	291.942	528.508			0.854585
		evgTRINITY_DN89686_c7_g1_i1	WD repeat and HMG-box DNA-binding 1-like	68.1087	61.7233	35.2686	10.9775	26.5401	28.0544	-1.31474	-1.52613
		evgTRINITY_DN81965_c3_g1_i1	leucine-rich repeat and WD repeat-containing 1	0	1.02872	89.3472	0	0	0	-6.13252	-5.77476
		evgTRINITY_DN93353_c12_g1_i1	WD repeat-containing 43-like	250.031	262.324	206.909	398.85	389.003	283.259		0.716218
	Cell adhesion	evgTRINITY_GG_14633_c22_g1_i1	calreticulin-like	6268.78	8434.87	4854.03	3228.13	2082.82	2525.31	-1.31935	-1.33373
		evgTRINITY_BU_DN87414_c0_g1_i1	calreticulin-like	2201.24	2371.27	1399.89	964.73	512.566	655.069	-1.48528	-1.43859	-1.61363
		evglcl|G0WVJSS01DIBSR	calreticulin-like	242.055	329.931	211.224	56.3513	83.2071	63.4481	-1.94878	-1.89555	-2.25246
		evgTRINITY_DN79814_c0_g2_i1	probable serine carboxypeptidase CPVL	507.41	654.74	562.241	108.86	173.883	192.091	-1.85766	-2.17831	-1.56298
		evgTRINITY_DN61923_c0_g1_i1	zinc carboxypeptidase A 1-like	15.2348	12.3549	12.7908	107.336	8234.87	3.56562		7.97234
		evgTRINITY_BU_DN6973_c0_g1_i1	zinc carboxypeptidase A 1-like	8.0207	0	15.2831	31.7129	1278.48	3.61992		6.73585
		evgTRINITY_DN5705_c0_g1_i1	carboxypeptidase B-like	122.775	114.188	56.4298	291.514	225.212	104.073		1.39368
		evgTRINITY_DN80734_c2_g1_i1	D-alanyl-D-alanine-carboxypeptidase/endopeptidase AmpH-like	147.868	181.055	169.195	331.765	238.861	462.444			1.49648
		evglcl|G0WVJSS01AN4TX	cathepsin B-like	102.1	108.52	133.891	175.299	219.737	125.62		0.781244
		evgTRINITY_DN102317_c0_g1_i1	cathepsin L, putative	10.754	110.073	0	0	2.27487	5.42988		-4.69498
		evgTRINITY_DN87352_c2_g1_i1	cathepsin L1-like (Bp v1)	1.79233	3.08616	0	17.8324	41.8879	1.80996		3.83578
		evgTRINITY_DN99958_c0_g1_i1	cathepsin L1-like (Bp v2)	10.8974	72.4014	10.8627	197.62	135.491	13.2127		2.37867
		evgTRINITY_DN94571_c0_g1_i1	cathepsin L1-like (Bp v2)	72.5896	98.7572	344.457	31.7129	8.34119	0.904979			-6.8656
		evgTRINITY_DN61331_c0_g1_i1	cathepsin Z-like	78.8627	86.4126	44.6736	218.794	301.799	176.471	1.72487	1.88395	1.34434
	Cell proliferation, migration, differentiation, cell cycle regulation	evgTRINITY_BU_DN77885_c1_g1_i1	PREDICTED: multiple epidermal growth factor-like domains protein 10 isoform X5	0	0.514361	0.58781	0	53.0348	1.80996		4.82727
		evgTRINITY_GG_19531_c1_g1_i2	multiple epidermal growth factor-like domains protein 10, partial	23.4975	43.8852	55.1954	26.6266	41.2585	165.258			2.19271
		evgTRINITY_DN90923_c14_g1_i1	Biomphalaria glabrata multiple epidermal growth factor-like domains 6	20.0831	50.8806	39.207	50.8503	32.7202	142.534			1.95967
		evgTRINITY_DN90923_c15_g1_i1	PREDICTED: multiple epidermal growth factor-like domains protein 10 isoform X1	23.372	77.5244	59.8274	94.858	33.8576	206.724			1.93799
		evgTRINITY_GG_454Uninf_4858_c0_g1_i1	Biomphalaria glabrata multiple epidermal growth factor-like domains 6	17.6186	59.5835	64.6474	55.1682	33.1903	171.964			1.84487
		evgTRINITY_GG_2835_c2_g1_i1	Biomphalaria glabrata multiple epidermal growth factor-like domains 6	10.6196	33.1865	19.7152	32.091	10.9421	71.5296			1.74986
		evgTRINITY_GG_454Uninf_2199_c0_g2_i1	multiple epidermal growth factor-like domains protein 10, partial	14.5538	24.8128	43.3569	16.2833	16.6445	92.6427			1.73415
		evglcl|G0WVJSS01ERHRC	multiple epidermal growth factor-like domains protein 10 (Bp v1)	2.24042	6.30606	12.8143	4.46419	8.25019	24.0544			1.7325
		evgTRINITY_GG_19531_c1_g1_i1	multiple epidermal growth factor-like domains protein 10, partial	24.9672	48.3087	69.4792	31.1518	27.4577	144.389			1.58966
		evgTRINITY_GG_15582_c1_g1_i2	multiple epidermal growth factor-like domains protein 10 (Bp v1)	101.482	158.084	286.863	179.836	191.612	507.322			1.44828
		evglcl|G0WVJSS02IC8M5	Biomphalaria glabrata multiple epidermal growth factor-like domains 11	46.6007	34.9765	74.0641	25.6142	67.4878	118.552			1.18679
		evgTRINITY_DN89410_c9_g1_i1	multiple epidermal growth factor-like domains protein 10 (Bp v1)	76.3086	122.058	145.401	64.5479	147.957	232.408			1.27643
		evgTRINITY_GG_16229_c0_g1_i1	multiple epidermal growth factor-like domains protein 10 (Bp v1)	197.067	324.695	253.276	165.187	257.508	519.431			1.15624
		evgTRINITY_DN92946_c15_g2_i1	death-associated inhibitor of apoptosis 1-like	23.3004	10.2872	11.7562	4.8789	0	0		-2.35359
		evgTRINITY_DN12462_c0_g1_i1	eukaryotic peptide chain release factor subunit 1	538.337	553.452	499.639	870.884	964.544	711.314	0.677878	0.798626
		evglcl|G0WVJSS02F332G	translationally-controlled tumor homolog	433.879	517.735	535.401	830.035	716.098	723.576	0.696422	0.644215	0.562131
	Cell-to-cell signaling	evgTRINITY_DN94998_c0_g1_i1	guanylate kinase	0.896167	0	197.504	0	0	0	-7.22596	-6.92444	-6.97425
		evgTRINITY_DN91985_c11_g1_i8	A disintegrin and metalloproteinase with thrombospondin motifs 2-like isoform X3	67.9205	42.8668	62.8252	4.98868	27.6321	24.905	-1.57156	-1.78537
		evgTRINITY_DN91502_c0_g1_i1	acetylcholine receptor subunit beta-like 1-like	84.2397	85.3839	94.0497	48.789	42.4642	67.8735	-0.723811
	Nucleic acid biosynthesis, metabolism, and repair	evgTRINITY_DN92655_c9_g2_i1	deoxyribonuclease-1-like	1766.26	7596.93	626.853	178.056	114.896	55.1313	-4.83766	-4.62537
		evglcl|G0WVJSS02HNPDM	endonuclease G, mitochondrial-like	0	0	0	1.96376	86.1341	1.25792	6.86888
		evglcl|G0WVJSS02FIZDS	endonuclease mitochondrial-like	3.5309	0.277755	0	0	219.495	0	5.42421
		evgTRINITY_DN99849_c0_g1_i1	tRNA-splicing endonuclease subunit Sen54-like isoform X2	298.424	400.173	339.754	572.051	527.011	484.164	0.679365	0.666694
		evgTRINITY_DN99640_c0_g1_i1	endonuclease G, mitochondrial-like	62.9647	14.4021	4.14994	51.4358	5165.89	20.0543		6.33414
		evgTRINITY_DN102266_c0_g1_i1	endonuclease G, mitochondrial-like	92.8519	18.9182	4.82005	54.9974	7078.22	17.9548		6.2435
		evglcl|G0WVJSS02I7SKE	endonuclease G, mitochondrial-like	9.66068	2.05744	0	5.97665	528.771	3.22173		5.69166
		evglcl|G0WVJSS01BQZ0K	endonuclease mitochondrial-like	1.56829	1.63567	0	1.28071	161.319	0		5.51413
		evglcl|G0WVJSS01C29AB	tRNA-splicing endonuclease subunit Sen15-like isoform X1	3.67429	0.802403	24.0062	67.2679	39.4386	9.16744		2.41797
		evglcl|G0WVJSS01AMZOG	DNA annealing helicase and endonuclease ZRANB3-like	118.294	164.595	125.791	258.582	78.8621	64.2535			-1.56412
		evgTRINITY_DN90139_c15_g1_i1	general transcription factor IIH subunit 3-like	276.916	259.238	297.432	521.408	464.377	440.725	0.774129	0.826163	0.684221
		evgTRINITY_DN17616_c1_g1_i1	myc proto-oncogene protein-like	393.417	495.844	518.449	746.472	796.962	701.359	0.672723	0.717894	0.593814
		evgTRINITY_DN93337_c5_g1_i1	reverse transcriptase-like protein 52 [Biomphalaria glabrata]	19.7605	20.9962	47.354	86.942	74.0167	79.5477	1.43498	1.44215	1.41752
		evglcl|G0WVJSS02HT1HC	putative reverse transcriptase	7.20519	1.69739	9.28741	28.1391	18.434	26.8055	1.93692	1.87547
		evglcl|G0WVJSS01EV5ZA	reverse transcriptase	16.597	19.8749	29.9666	15.2466	16.5459	46.9503			1.16751
		evgTRINITY_DN92653_c18_g1_i1	decapping and exoribonuclease -like	724.999	1000.95	768.856	1591.74	1248.77	1356.45	0.751778	0.769239	0.718476
		evgTRINITY_GG_5943_c13_g2_i1	poly(U)-specific endoribonuclease-C-like	68.1087	76.1254	72.8885	21.9551	30.3316	46.1539	-1.13663
		evgTRINITY_DN76474_c1_g1_i1	probable ATP-dependent RNA helicase DDX5 isoform X1	5841.02	6560.68	8186.07	13973.1	12072.4	9824.67	0.89595	0.922693
		evgTRINITY_GG_454Uninf_11007_c0_g1_i1	ATP-dependent RNA helicase DDX42	957.107	1191.26	1088.63	1703.96	1669	1603.62	0.622922	0.644496	0.587953
		evgTRINITY_DN94503_c0_g1_i1	probable ATP-dependent RNA helicase DDX31	758.158	1094.56	1007.51	1606.38	1403.59	1377.38	0.616988	0.657381
		evgTRINITY_DN74969_c0_g1_i1	probable ATP-dependent RNA helicase DDX56	0	1.02872	524.327	0	0	0		-8.33435	-8.31248
		evgTRINITY_DN77379_c0_g1_i1	transcription initiation factor TFIID subunit 5-like	746.507	824.006	1031.02	1290.47	1408.7	1321.27	0.627729	0.637759
		evgTRINITY_DN92428_c1_g1_i1	CW-type zinc finger 3-like	270.696	340.836	331.266	507.979	499.857	407.458	0.585399	0.681522
		evgTRINITY_DN74103_c1_g1_i1	zinc finger protein zic 4-like	145.179	150.193	78.7666	14.6367	37.1562	46.1539	-1.91912	-2.24398
		evgTRINITY_GG_9319_c1_g1_i4	zinc finger 345-like	24.5908	20.3995	26.0047	123.851	20.489	113.611			2.27214
		evgTRINITY_GG_25720_c0_g1_i1	zinc finger 345-like	29.0179	50.5411	49.5877	156.588	36.1553	142.136			1.73698
		evgTRINITY_DN79916_c1_g1_i1	zinc finger 1-like isoform X1	297.528	234.548	263.339	103.677	226.729	144.797			-0.853556
	Protease	evgTRINITY_GG_454Uninf_1376_c0_g4_i1	chymotrypsin-like elastase family member 1	3.93417	0	4.92585	26.0167	936.905	0		6.93656
		evgTRINITY_DN89061_c3_g1_i1utrorf	dipeptidase 1-like	54.6662	9.25849	58.781	119.533	246.444	334.842	2.59822		3.26592
		evgTRINITY_GG_454Uninf_7956_c0_g2_i1	heparanase-like	27.2076	36.7562	41.9344	1.21973	6.6047	16.4706	-2.64878
		evgTRINITY_DN88241_c2_g1_i3	heparanase-like, partial	8.06551	3.08616	10.1691	30.4931	43.723	11.7647		2.32376
		evgTRINITY_DN102302_c0_g1_i1	BPTI Kunitz domain-containing 4-like isoform X1	70.4656	63.7704	64.6592	1333.31	1139.06	781.64	4.23845	4.29465	3.57168
		evglcl|G0WVJSS01EKDHJ	BPTI Kunitz domain-containing 4-like	8.06551	14.4021	10.5806	239.7	171.722	119.53	3.95246	4.16213	3.42885
		evglcl|G0WVJSS02H6NS0	BPTI Kunitz domain-containing 4-like	7.38442	13.3837	15.2831	219.294	160.917	126.489	3.76438	3.92982	3.38578
		evgTRINITY_DN86401_c0_g1_i1	A disintegrin and metalloproteinase with thrombospondin motifs 7-like isoform X1	264.369	233.52	231.597	75.623	156.966	157.466	-0.991212	-1.5996	-0.626238
		evgTRINITY_GG_454Uninf_3202_c1_g1_i2	zinc metalloproteinase nas-14-like	5.61001	5.11274	3.13891	37.8359	24.9856	9.55658		2.65944
		evgTRINITY_DN91942_c6_g1_i1	zinc metalloproteinase nas-13-like (Bp v1)	48.393	93.6136	117.562	165.883	106.919	220.815			1.34253
		evgTRINITY_DN92806_c21_g1_i1	zinc metalloproteinase nas-13-like (Bp v2)	143.387	225.29	231.597	163.443	202.463	418.1			1.72878
		evgTRINITY_DN79814_c0_g2_i1	probable serine carboxypeptidase CPVL	507.41	654.74	562.241	108.86	173.883	192.091	-1.85766	-2.17831	-1.56298
		evgTRINITY_DN79519_c0_g1_i1	serpin B6-like	1519.9	1746.77	1882.31	3944.59	3419.13	2125.8		1.11681
		evglcl|G0WVJSS02GKBAX	tyrosinase tyr-3 (Bp v1)	81.5602	47.5681	21.9136	5.24482	6.0739	16.4344		-3.45789
		evgTRINITY_BU_DN75459_c0_g1_i1	tyrosinase tyr-3 (Bp v2)	502.75	64.8094	22.3368	10.9775	1.51658	9.04979		-5.23968
		evgTRINITY_DN25074_c0_g1_i1	tyrosinase tyr-1	405.964	46.2925	0	393.691	5.64168	0.904979			-7.76221
	Protease inhibitor	evgTRINITY_DN82535_c0_g1_i1	EF-hand calcium-binding domain-containing protein 6-like	923.949	706.731	730.061	315.909	718.1	390.046			-1.45919
		evgTRINITY_DN90937_c10_g1_i1utrorf	inter-alpha-trypsin inhibitor heavy chain H2-like	263.375	339.879	895.6	1403.44	1200.79	951.396	1.24552	1.37279
		evglcl|G0WVJSS02IJ2Y8	cystatin	3.98794	3.90914	0	16.5639	30.8851	2.1448		2.96942
		evglcl|HJ4YRIA01EKANC	cystatin	49.9793	80.4871	66.74	232.382	242.145	54.1992		1.84729
		evglcl|G0WVJSS02HY3RL	cystatin	6.96322	23.6092	22.6072	45.0079	50.0016	10.6245		1.48356
		evgTRINITY_BU_DN81814_c10_g2_i2	cyclin-dependent kinase-like 2 isoform X2	47.7657	33.1865	57.0764	12.5388	23.052	32.896		-1.33367
		evgTRINITY_DN73989_c0_g1_i1	Cyclin-dependent kinase 8	0.896167	0	424.399	0	0	0		-7.99923	-8.78413
	Protein modification, biosynthesis	evgTRINITY_DN82491_c3_g1_i1	arginine kinase-like	1.18294	0	0	1.21973	146.911	0.904979	5.95818
		evgTRINITY_DN90010_c20_g1_i1	E3 ubiquitin-protein ligase XIAP-like (Bp v1)	491.1	431.034	437.331	304.931	279.051	345.702	-0.547573	-0.632713
		evgTRINITY_DN91148_c0_g1_i1	E3 ubiquitin-protein ligase XIAP-like (Bp v2)	127.238	147.004	164.211	222.405	652.41	214.562			0.573465
		evgTRINITY_BU_DN81760_c4_g1_i1	methyltransferase-like protein 24	422.749	207.246	357.636	883.52	785.785	611.06	1.26118	1.33754
		evgTRINITY_DN90856_c16_g1_i1	putative methyltransferase DDB_G0268948	191.708	210.888	311.54	417.146	527.011	424.435	0.937136	0.984716
		evgTRINITY_DN92984_c8_g1_i1	(adenine(58)-N(1))-methyltransferase non-catalytic subunit TRM6-like	493.708	677.845	574.879	1044.01	819.711	912.997	0.668563		0.663745
		evgTRINITY_DN92861_c11_g1_i1	guanine-N7 methyltransferase-like	526.05	535.964	509.044	797.7	691.537	780.092	0.531534		0.593974
		evgTRINITY_DN84692_c0_g1_i1	(S)-coclaurine N-methyltransferase-like	103.059	133.734	78.7666	37.8115	60.6632	60.6336	-0.981943
		evgTRINITY_GG_4213_c0_g1_i1	methyltransferase-like protein 9	22.44	22.3027	21.2905	2.91514	0.765873	16.5702	-1.642
		evglcl|G0WVJSS02HAFR9	methyltransferase-like protein 24	61.6742	23.7943	60.4975	109.007	99.6848	67.3667		1.92817
		evgTRINITY_DN94652_c0_g1_i1	betaine--homocysteine S-methyltransferase 1-like	72.1952	12.3447	100.739	126.839	186.918	314.019			2.31118
		evglcl|G0WVJSS02H8DB7	ornithine decarboxylase antizyme 1-like	136.119	138.497	186.113	172.933	68.9437	296.643			0.962693
		evgTRINITY_DN16091_c0_g1_i1	peptidyl-prolyl cis-trans isomerase cyp6-like	8844.54	7905.65	6777.78	2241.51	3245.49	7334.97		-1.51627
		evgTRINITY_BU_DN80498_c7_g2_i1	secretory phospholipase A2 receptor-like	170.872	153.701	51.3511	1162.57	1517.63	525.105	3.87433	3.47288	2.66184
		evglcl|G0WVJSS01B10ZK	calcium-independent phospholipase A2-gamma-like	0	2.40721	5.44313	12.2216	20.0643	10.5702	2.26645	2.45737
		evgTRINITY_DN91981_c15_g1_i1	calcium-independent phospholipase A2-gamma-like	515.296	318.554	1475.84	2539.44	3886.64	2282.65	1.91415	2.44556
		evglcl|G0WVJSS01EHG5H	basic phospholipase A2-like	222.509	381.152	262.469	684.059	533.055	492.544	0.979957	1.71287
		evgTRINITY_GG_10209_c0_g1_i1	group 10 secretory phospholipase A2	6.27317	1.02872	24.688	78.0624	123.601	6.33486		3.17553
		evgTRINITY_DN92105_c1_g1_i1	N-acyl-phosphatidylethanolamine-hydrolyzing phospholipase D-like	47.4969	39.0914	44.6736	10.9775	25.7818	23.5295		-1.21336
		evgTRINITY_GG_454Uninf_2241_c0_g3_i1	basic phospholipase A2 caudoxin-like	8.03862	36.8488	45.955	26.6144	28.36	104.154			1.74682
	Signal transduction	evgTRINITY_DN93415_c2_g1_i1	ankyrin-1-like (Bp v1)	267.954	236.606	208.085	51.2285	90.9948	103.168	-1.53298	-1.72975	-1.17885
		evgTRINITY_DN64922_c0_g1_i1	ankyrin-3-like (Bp v1)	118.473	80.4666	59.9096	704.55	427.046	184.996		2.68635
		evgTRINITY_GG_24251_c6_g1_i1	ankyrin-3-like (Bp v2)	83.3436	63.1223	54.0786	0	32.6065	38.2535	-1.48353	-1.99488
		evglcl|G0WVJSS01DXQCI	ankyrin-1-like (Bp v2)	0	13.6923	17.505	7.72086	0	41.9548			1.95336
		evgTRINITY_DN41769_c0_g1_i1	F-box/WD repeat-containing protein 4-like	361.075	457.904	471.048	706.087	712.588	647.811	0.679218	0.722277	0.656797
		evgTRINITY_BU_DN82087_c7_g1_i1	F-box/LRR-repeat protein 4-like	66.3164	89.4987	67.0104	34.1523	50.0471	41.6291	-0.817852
		evgTRINITY_DN94793_c0_g1_i1	F-box only protein 39-like	3.58467	2.05744	1.17562	1.3539	138.009	1.80996		4.45286
		evgTRINITY_DN92655_c18_g1_i1	frizzled-9-like	112.917	166.653	89.3472	23.1748	56.8717	68.7784		-1.68573
		evgTRINITY_DN80560_c0_g1_i1	guanine nucleotide-binding protein-like 3 homolog	3.58467	1.02872	1.17562	0	128.947	122.453	5.14895	4.52994	5.78536
		evglcl|G0WVJSS02IO980	hepatocyte growth factor receptor-like	13.0303	29.8638	65.9053	25.4923	18.6008	131.656			1.89282
		evgTRINITY_DN52027_c0_g1_i1	dual specificity mitogen-activated protein kinase kinase 5-like isoform X1	119.19	141.964	177.519	235.407	240.378	212.67	0.64863	0.721557
		evgTRINITY_GG_454Uninf_11644_c0_g1_i2	serine/threonine-protein kinase mos-like	476.761	615.175	382.077	235.407	373.079	1621.72			1.73625
		evgTRINITY_BU_DN79662_c0_g1_i1	MAP kinase-activating death domain protein-like isoform X11	108.696	155.378	166.915	71.7686	115.419	54.697			-1.37312
		evgTRINITY_DN92840_c12_g1_i1	myeloid differentiation primary response protein MyD88-like isoform X1 [	562.793	539.05	685.387	683.046	913.072	910.409			0.624873
		evgTRINITY_DN92520_c10_g1_i1	rho GTPase-activating protein 8-like	25.9889	14.4021	30.5661	79.2821	94.0279	55.2037	1.66879	1.85761	1.23426
		evgTRINITY_BU_DN81773_c0_g1_i1	rho GTPase-activating protein 18-like (Bp v1)	0	37.4763	51.6333	101.262	1664.47	85.7649		4.65784
		evgTRINITY_GG_5756_c0_g1_i1	rho GTPase-activating protein 18-like (Bp v2)	1.01267	0	1.4225	1.42708	49.2206	1.18552		4.14858
		evgTRINITY_DN93604_c0_g1_i1	bone morphogenetic 3-like	119.862	135.781	84.7505	34.0425	66.2139	113.113		-1.16822
		evgTRINITY_DN29765_c0_g2_i1	bone morphogenetic protein 10	22.4042	6.17233	47.0248	59.7665	287.392	114.932			2.14385
		evglcl|G0WVJSS02HPDF7	ubiquitin ISG15	5.30531	2.28376	39.5009	66.78	77.0726	70.344	2.15495	2.15997
		evglcl|G0WVJSS02JC5PR	ubiquitin ISG15	6.15667	11.6966	22.0899	66.7556	54.248	42.534	1.99792	2.15262	1.65957
		evgTRINITY_DN64218_c0_g1_i1	poly-histidine-tagged ubiquitin	1862.43	2231.71	1836.77	3225.94	4149.94	3513.95	0.876513	0.897848	0.846567
		evgTRINITY_DN89607_c1_g1_i1	ubiquitin 7	1255.53	1746.77	1296.71	2296.74	1979.89	1962.9	0.537296
		evgTRINITY_GG_454Uninf_5324_c1_g6_i1	polyubiquitin	564.075	493.673	590.996	716.833	830.646	799.477			0.556463
		evgTRINITY_DN91396_c3_g1_i1	polyubiquitin	9348.1	8787.28	8624.16	11978.8	13584.6	12501.4		0.518826
		evgTRINITY_DN92181_c15_g1_i1	E3 ubiquitin- ligase RNF34-like	1795.02	2790.92	2901.43	5829.07	4145.44	4175.5	0.91815
		evgTRINITY_DN85164_c0_g2_i1	E3 ubiquitin- ligase FANCL-like	164.895	211.917	164.587	320.788	286.633	277.829	0.781621	0.753938	0.641426
		evgTRINITY_DN90010_c20_g1_i1	E3 ubiquitin- ligase XIAP-like	491.1	431.034	437.331	304.931	279.051	345.702	-0.547573	-0.632713
		evgTRINITY_DN86608_c0_g2_i1	E3 ubiquitin- ligase UBR5-like	397.325	405.378	318.617	227.21	244.215	240.091	-0.655242	-0.663145	-0.619689
		evgTRINITY_DN93077_c17_g1_i1	E3 hybrid ubiquitin- ligase UBE2O-like	505.34	546.251	623.079	761.109	897.815	726.128		0.571152
REPRODUCTION, NEUROPEPTIDES, HORMONES, MONOAMINES		evgTRINITY_DN99945_c0_g1_i1	Yolk ferritin-like	0	2.05744	0.58781	8.53808	81.7815	0.904979	4.53973	4.92588
		evgTRINITY_DN94507_c0_g1_i1	Ovipostatin 5	299.32	601.802	150.479	2999.3	4241.11	2727.61	3.24308	3.35661	2.96409
		evgTRINITY_DN93032_c13_g1_i3	Neuropeptide Y receptor type 5-like	29.5735	48.3499	43.498	165.883	173.648	76.9232	1.76698	2.05974	0.948953
		evgTRINITY_DN89603_c2_g1_i1utrorf	Tyramine beta-hydroxylase-like/Dopamine beta-hydroxylase-like (v4)	799.829	920.561	581.921	1786.07	1516.61	1478.74	1.05392	1.10301	0.956516
		evgTRINITY_DN93135_c15_g1_i1	FMRF-amide receptor-like (fragmented with evgTRINITY_GG_454Uninf_5136_c1_g1_i1)	325.309	263.353	618.377	685.486	788.621	969.233	1.01658
		evgTRINITY_GG_454Uninf_5136_c1_g1_i1	FMRF-amide receptor-like (fragmented with evgTRINITY_DN93135_c15_g1_i1)	25.0927	29.8329	50.5517	64.6454	65.9712	80.5432	0.992355	0.890073	1.19672
		evgTRINITY_DN102372_c0_g1_i1	Snail yolk ferritin	49.1727	18.1672	9.12282	176.067	399.49	71.5748		3.4204
		evglcl|G0WVJSS01A4BPB	Small cardioactive peptides	39.0639	8.87786	15.2948	70.6831	92.9208	28.9684		1.92835
		evglcl|G0WVJSS01AOFRL	Bursicon alpha-like	10.8615	22.3747	7.71207	30.6029	23.4615	102.507			2.9114
		evgTRINITY_GG_454Uninf_2029_c1_g1_i1	Bursicon alpha-like	47.3893	36.2624	42.8396	21.8453	60.7087	229.62			2.45675
		evgTRINITY_DN93504_c13_g1_i1	Octopamine receptor-like	54.6662	120.36	170.465	78.0624	48.5305	591.857			2.35596
		evgTRINITY_DN89437_c16_g1_i1	Sodium- and chloride-dependent glycine transporter 2-like (Bp v1)	93.2014	5.14361	185.748	182.959	166.065	420.815			2.07305
		evgTRINITY_DN91266_c17_g1_i1	Sodium- and chloride-dependent taurine transporter-like	233.837	235.577	263.339	296.393	430.709	657.92			1.44719
		evgTRINITY_DN91969_c20_g1_i1	D(2) dopamine receptor A-like	91.5973	141.614	123.37	286.745	168.075	215.331			0.871226
		evgTRINITY_DN93358_c13_g1_i1	Tyramine beta-hydroxylase-like/Dopamine beta-hydroxylase-like (v5)	64.6764	75.5904	56.324	46.3496	41.5315	23.6652	-0.810158
		evgTRINITY_DN82526_c2_g1_i1	Pedal peptide 2	126.566	103.212	84.7035	58.9249	27.5487	71.0047	-0.991755	-1.2694
		evgTRINITY_DN68911_c0_g1_i2	Ovipostatin 2	43.4641	53.1849	21.9724	17.7592	9.03123	16.905	-1.41355	-1.52081
		evgTRINITY_GG_24206_c0_g2_i1	Insulin-like growth factor-binding protein complex acid labile subunit	69.6232	96.0106	48.8823	17.9909	31.4084	107.177		-1.51011
